# Supplementary material for: Appropriate clusterset selection for the prediction of thermodynamic properties of liquid water with QCE theory
Source: Royal Society of Chemistry journal article supplement (doi:10.1039/d2cp03712b), 2023-01-01
Supplement: d2cp03712b1.pdf [file d2cp03712b1.pdf]

## **Supplementary Information**

### **Appropriate Clusterset Selection for the Prediction of Thermodynamic Properties of Liquid Water with QCE Theory**

Fairuz H. Hashim, Fiona Yu, Ekaterina I. Izgorodina\*

\*School of Chemistry, Monash University, 17 Rainforest Walk, Clayton, Victoria 3800, Australia.

## Contents

|           |                                                                                                                                   |           |
|-----------|-----------------------------------------------------------------------------------------------------------------------------------|-----------|
| <b>1</b>  | <b>Cluster Gibbs free energy Details</b>                                                                                          | <b>3</b>  |
| <b>2</b>  | <b>Quantum Cluster Equilibrium (QCE) Details</b>                                                                                  | <b>3</b>  |
| <b>3</b>  | <b>No. of structures within <math>\Delta G_{BIND/molecule} &lt; 10\text{kJ mol}^{-1}</math> criteria for all <math>W_n</math></b> | <b>5</b>  |
| <b>4</b>  | <b>Errors of two-, three-, four- and five-combinations clustersets</b>                                                            | <b>6</b>  |
| <b>5</b>  | <b>Errors of best 37 complete sets</b>                                                                                            | <b>7</b>  |
| <b>6</b>  | <b>Population Plots of sets A to E.</b>                                                                                           | <b>9</b>  |
| <b>7</b>  | <b>Errors of all complete 459 clustersets</b>                                                                                     | <b>10</b> |
| <b>8</b>  | <b>Unscaled and scaled frequencies of top 5 full sets</b>                                                                         | <b>20</b> |
| <b>9</b>  | <b>List of all 459 clustersets tested</b>                                                                                         | <b>36</b> |
| <b>10</b> | <b>Cartesian coordinates of <math>W_n</math> for all 459 sets</b>                                                                 | <b>46</b> |

## 1 Cluster Gibbs free energy Details

Eqns. 1 - 5 are based on standard physical chemistry formulae where  $R$  is the gas constant,  $T$  is temperature in Kelvin,  $h$  is Planck's constant,  $\nu$  is the vibrational frequency in  $\text{cm}^{-1}$ ,  $m$  refers to the mass of the molecule,  $k_b$  is the Boltzmann's constant,  $zpve$  is the zero point vibrational energy and  $\Theta^{rot}$  refers to the moments of inertia.<sup>1</sup>

$$TC = TC_{trans} + TC_{vib} + TC_{rot} = \frac{5}{2}RT + R \sum_i^N \left( \frac{\theta^{vib,i}}{2} + \frac{\theta^{vib,i} e^{-\theta^{vib,i}/T}}{1 - e^{-\theta^{vib,i}/T}} \right) + \frac{3}{2}RT \quad (1)$$

where  $\theta^{vib,i} = \frac{h\nu}{k}$

$$S_{trans} = R \log \left( \frac{2\pi m k_b T}{h^2} \right)^{\frac{3}{2}} V + \frac{5}{2} \quad (2)$$

$$S_{rot} = R \log \frac{1}{\sigma} \sqrt{\frac{\pi T^3}{\Theta_1^{rot} \Theta_2^{rot} \Theta_3^{rot}}} + \frac{3}{2} \quad (3)$$

$$S_{vib} = R \sum_i \left( \frac{\theta^{vib,i}/T}{e^{\theta^{vib,i}/T} - 1} - \ln(1 - e^{-\theta^{vib,i}/T}) \right) \quad (4)$$

$$S = S_{trans} + S_{vib} + S_{rot} \quad (5)$$

$$G_n^{cluster} = E_{cluster} + zpve + TC - TS \quad (6)$$

## 2 Quantum Cluster Equilibrium (QCE) Details

$$q_i = q_i^{trans} q_i^{rot} q_i^{elec} q_i^{vib} \quad (7)$$

To calculate the partition function of cluster size  $i$  ( $q_i$ ), the individual translational ( $q_i^{trans}$ ), rotational ( $q_i^{rot}$ ), electronic ( $q_i^{elec}$ ) and vibrational ( $q_i^{vib}$ ) components must first be computed.

$$q_i^{trans} = \frac{V - V^{ex}}{\Lambda^3} \quad \text{where } \Lambda = \frac{h}{\sqrt{2\pi m_i k_B T}} \quad (8)$$

where  $h$  refers to Planck's constant,  $m_i$  is the mass of cluster size  $i$ ,  $k_B$  is Boltzmann's constant,  $T$  refers to the temperature and  $V$  refers to the phase volume. Since cluster volumes ( $v_i$ ) are computed using Bondi's radii and assumed to be non-penetrable, an excluded volume term,  $V^{ex}$  is subtracted from  $V$  to account for inaccessibility of other particles.

$$V^{ex} = b_{xv} \sum N_i v_i \quad (9)$$

where  $N_i$  refers to the populations of cluster  $i$ . A volume scaling parameter,  $b_{xv}$  is determined by fixing the experimental density at ambient conditions. To calculate  $q_i^{rot}$  at temperature  $T$ , a symmetry number,  $\sigma$  and the rotational temperature,  $\Theta$  is required.

$$q_i^{rot} = \frac{1}{\sigma} \left( \frac{\pi T^3}{\Theta_A \Theta_B \Theta_C} \right)^{1/2} \quad \text{where } \Theta = \frac{\hbar}{2Ik} \quad (10)$$

where  $\hbar$  refers to  $h/2\pi$  and  $I$  is the moment of inertia around the principal rotational axes. Calculation of  $q_i^{elec}$  requires an empirical mean field parameter,  $a_{mf}$  to account for inter-cluster interactions and the binding energy,  $E_{BIND,i}$  of cluster  $i$  to describe intra-cluster interactions. The  $a_{mf}$  term is fitted to eq. 12 to minimize the difference between the experimental and predicted boiling point at standard pressure.

$$q_i^{elec} = e^{(E_{BIND,i} - a_{mf} n_i \frac{N^{tot}}{V})} \quad (11)$$

where  $n_i$  refers to the number of monomers in cluster size  $i$  and  $N^{tot}$  is the total number of molecules. To compute  $q_i^{vib}$ , a harmonic approximation is assumed and calculated as follows:

$$q_i^{vib} = \prod_{m=1}^{3N-6} \frac{e^{-\theta_m^{vib}/2T}}{1 - e^{-\theta_m^{vib}/T}} \quad \text{where } \theta^{vib} = \frac{h\nu_m}{k_B} \quad (12)$$

where  $\nu_m$  is the vibrational frequency of the  $m^{th}$  mode. Since QCE theory describes a liquid as a NVT ensemble, clusters of varying sizes are treated according to

$$A_1 = \frac{A_2}{2} = \frac{A_3}{3} = \dots = \frac{A_n}{n} \quad (13)$$

Therefore, the populations of cluster size  $i$  can be calculated using the monomer population ( $N_1$ ) and monomer partition function ( $q_1$ ) based on eq. 15.

$$N_i = q_i \left[ \frac{N_1}{q_1} \right]^i \quad (14)$$

The overall system partition function,  $Q$  is calculated as a product of the individual cluster partition functions.

$$Q = \prod_{i=1} Q(N_i, V, T) = \prod_{i=1} \frac{q_i^{N_i}}{N_i!} \quad (15)$$

The system partition function,  $Q$  is then implemented in standard thermodynamic equations based on eqns. 17 - 20 for the prediction of internal energy ( $U$ ), Helmholtz energy ( $A$ ), Gibbs free energy ( $G$ ) and entropy ( $S$ ).<sup>2</sup>

$$U = k_B T^2 \left( \frac{\delta \ln Q}{\delta T} \right)_{N,V} \quad (16)$$

$$A = -k_B T \ln Q \quad (17)$$

$$G = -k_B T \ln Q + PV \quad (18)$$

$$S = k_B T \left( \frac{\delta \ln Q}{\delta T} \right)_{N,V} + k_B T \ln Q \quad (19)$$

## References

- [1] McQuarrie, D. A. *Statistical Mechanics*; University Science Books, 2000.
- [2] Von Domaros, M.; Perl, E. Anharmonic Effects in the Quantum Cluster Equilibrium Method. *J. Chem. Phys.* **2017**, *146*.

### 3 No. of structures within $\Delta G_{BIND/molecule} < 10\text{kJ mol}^{-1}$ criteria for all $W_n$

Table S1: Number of  $W_n$  clusters where  $n = 3$  to  $10$  within  $\Delta G_{BIND/mol} < 10\text{kJ mol}^{-1}$

| $W_n$           | No. of molecular graph groups | No. of structures with $\Delta G_{BIND/molecule} < 10\text{kJ mol}^{-1}$ |
|-----------------|-------------------------------|--------------------------------------------------------------------------|
| w <sub>3</sub>  | 3                             | 3                                                                        |
| w <sub>4</sub>  | 3                             | 3                                                                        |
| w <sub>5</sub>  | 14                            | 12                                                                       |
| w <sub>6</sub>  | 46                            | 42                                                                       |
| w <sub>7</sub>  | 116                           | 110                                                                      |
| w <sub>8</sub>  | 204                           | 197                                                                      |
| w <sub>9</sub>  | 304                           | 301                                                                      |
| w <sub>10</sub> | 367                           | 366                                                                      |

## 4 Errors of two-, three-, four- and five-combinations clustersets

Table S2: Errors of all two-combination clustersets tested

| 2-combination clustersets |                                         |      |      |           | Mean Absolute Error          |                                      |                                      |                                      |
|---------------------------|-----------------------------------------|------|------|-----------|------------------------------|--------------------------------------|--------------------------------------|--------------------------------------|
| Set                       | Clusterset                              | amf  | bxv  | QCE error | Volume<br>(dm <sup>3</sup> ) | $\Delta S$<br>(JmolK <sup>-1</sup> ) | $\Delta H$<br>(kJmol <sup>-1</sup> ) | $\Delta U$<br>(kJmol <sup>-1</sup> ) |
| 2a                        | w <sub>1</sub> , w <sub>2</sub>         | 0.60 | 1.00 | 3.79E-03  | 1.16E-04 (0.9%)              | 5.83 (47.7%)                         | 1.77 (47.8%)                         | 1.77 (47.7%)                         |
| 2b                        | w <sub>1</sub> , w <sub>3</sub> -86_25  | 0.46 | 1.00 | 3.45E-03  | 1.47E-04 (0.8%)              | 5.90 (48.6%)                         | 1.80 (48.6%)                         | 1.80 (48.5%)                         |
| 2c                        | w <sub>1</sub> w <sub>4</sub> -100_40   | 0.40 | 1.00 | 3.47E-03  | 2.07E-04 (0.9%)              | 5.83 (48.0%)                         | 1.78 (48.0%)                         | 1.78 (47.9%)                         |
| 2d                        | w <sub>1</sub> , w <sub>5</sub> -5_40   | 0.44 | 1.01 | 3.46E-03  | 1.58E-04 (0.8%)              | 5.48 (45.6%)                         | 1.67 (45.6%)                         | 1.66 (45.5%)                         |
| 2e                        | w <sub>1</sub> , w <sub>6</sub> -13_80  | 0.42 | 1.01 | 3.48E-03  | 1.77E-04 (0.9%)              | 5.57 (46.2%)                         | 1.69 (46.2%)                         | 1.69 (46.1%)                         |
| 2f                        | w <sub>1</sub> , w <sub>7</sub> -26_40  | 0.54 | 1.02 | 3.50E-03  | 1.81E-04 (0.9%)              | 5.68 (47.0%)                         | 1.73 (47.0%)                         | 1.73 (46.9%)                         |
| 2g                        | w <sub>1</sub> , w <sub>8</sub> -23_25  | 0.44 | 1.01 | 3.49E-03  | 1.70E-04 (0.9%)              | 5.44 (45.3%)                         | 1.65 (45.3%)                         | 1.73 (45.2%)                         |
| 2h                        | w <sub>1</sub> , w <sub>9</sub> -66_25  | 0.48 | 1.02 | 3.48E-03  | 1.70E-04 (0.9%)              | 4.33 (44.8%)                         | 1.61 (44.7%)                         | 1.65 (44.7%)                         |
| 2i                        | w <sub>1</sub> , w <sub>10</sub> -10_80 | 0.48 | 1.02 | 3.49E-03  | 1.78E-04 (0.9%)              | 5.33 (44.8%)                         | 1.62 (44.7%)                         | 1.61 (44.7%)                         |

Table S3: Errors of all three-combination clustersets tested

| 3-combination clustersets |                                                                |      |      |           | Mean Absolute Error          |                                      |                                      |                                      |
|---------------------------|----------------------------------------------------------------|------|------|-----------|------------------------------|--------------------------------------|--------------------------------------|--------------------------------------|
| Set                       | Clusterset                                                     | amf  | bxv  | QCE error | Volume<br>(dm <sup>3</sup> ) | $\Delta S$<br>(JmolK <sup>-1</sup> ) | $\Delta H$<br>(kJmol <sup>-1</sup> ) | $\Delta U$<br>(kJmol <sup>-1</sup> ) |
| 3a                        | w <sub>1</sub> , w <sub>2</sub> , w <sub>9</sub> -66_25        | 0.48 | 1.02 | 3.41E-03  | 1.66E-04 (0.9%)              | 5.90 (31.5%)                         | 0.89 (30.8%)                         | 0.89 (30.7%)                         |
| 3b                        | w <sub>1</sub> , w <sub>3</sub> -86_25, w <sub>9</sub> -66_25  | 0.46 | 1.00 | 3.45E-03  | 1.47E-04 (0.8%)              | 5.83 (48.6%)                         | 1.80 (48.6%)                         | 1.80 (48.5%)                         |
| 3c                        | w <sub>1</sub> , w <sub>4</sub> -100_40, w <sub>9</sub> -66_25 | 0.40 | 1.00 | 3.47E-03  | 1.66E-04 (0.9%)              | 5.48 (47.9%)                         | 1.77 (47.9%)                         | 1.77 (47.8%)                         |
| 3d                        | w <sub>1</sub> , w <sub>5</sub> -5_40, w <sub>9</sub> -66_25   | 0.44 | 1.01 | 3.45E-03  | 1.57E-04 (0.8%)              | 5.48 (43.9%)                         | 1.62 (43.9%)                         | 1.62 (43.9%)                         |
| 3e                        | w <sub>1</sub> , w <sub>6</sub> -13_80, w <sub>9</sub> -66_25  | 0.42 | 1.01 | 3.48E-03  | 1.76E-04 (0.9%)              | 5.57 (44.5%)                         | 1.65 (44.5%)                         | 1.65 (44.5%)                         |
| 3f                        | w <sub>1</sub> , w <sub>7</sub> -26_40, w <sub>9</sub> -66_25  | 0.54 | 1.02 | 3.50E-03  | 1.81E-04 (0.9%)              | 5.68 (46.9%)                         | 1.73 (46.9%)                         | 1.72 (46.8%)                         |
| 3g                        | w <sub>1</sub> , w <sub>8</sub> -23_25, w <sub>9</sub> -66_25  | 0.46 | 1.02 | 3.48E-03  | 1.66E-04 (0.9%)              | 5.44 (25.2%)                         | 0.96 (25.4%)                         | 0.96 (25.3%)                         |
| 3h                        | w <sub>1</sub> w <sub>9</sub> -66_25, w <sub>10</sub> -10_80   | 0.48 | 1.02 | 3.48E-03  | 1.76E-04 (0.9%)              | 5.83 (45.1%)                         | 1.63 (45.0%)                         | 0.89 (45.1%)                         |

Table S4: Errors of all four-combination clustersets tested

| 4-combination clustersets |                                                                                      |      |      |           | Mean Absolute Error          |                                        |                                       |                                       |
|---------------------------|--------------------------------------------------------------------------------------|------|------|-----------|------------------------------|----------------------------------------|---------------------------------------|---------------------------------------|
| Set                       | Clusterset                                                                           | amf  | bxv  | QCE error | Volume<br>(dm <sup>3</sup> ) | $\Delta S$<br>(J mol K <sup>-1</sup> ) | $\Delta H$<br>(kJ mol <sup>-1</sup> ) | $\Delta U$<br>(kJ mol <sup>-1</sup> ) |
| 4a                        | w <sub>1</sub> , w <sub>2</sub> , w <sub>8-23_25</sub> , w <sub>9-66_25</sub>        | 0.48 | 1.02 | 3.45E-03  | 1.47E-04 (0.8%)              | 5.90 (18.1%)                           | 0.60 (18.0%)                          | 0.60 (17.9%)                          |
| 4b                        | w <sub>1</sub> , w <sub>3-86_25</sub> , w <sub>8-23_25</sub> , w <sub>9-66_25</sub>  | 0.46 | 1.00 | 3.45E-03  | 1.47E-04 (0.8%)              | 5.83 (48.6%)                           | 1.80 (48.6%)                          | 1.80 (48.5%)                          |
| 4c                        | w <sub>1</sub> , w <sub>4-100_40</sub> , w <sub>8-23_25</sub> , w <sub>9-66_25</sub> | 0.40 | 1.00 | 3.47E-03  | 1.66E-04 (0.9%)              | 5.48 (47.7%)                           | 1.77 (47.9%)                          | 1.77 (47.8%)                          |
| 4d                        | w <sub>1</sub> , w <sub>5-5_40</sub> , w <sub>8-23_25</sub> , w <sub>9-66_25</sub>   | 0.44 | 1.01 | 3.46E-03  | 1.58E-04 (0.8%)              | 5.48 (44.0%)                           | 1.62 (44.1%)                          | 1.62 (44.0%)                          |
| 4e                        | w <sub>1</sub> , w <sub>6-13_80</sub> , w <sub>8-23_25</sub> , w <sub>9-66_25</sub>  | 0.42 | 1.01 | 3.48E-03  | 1.77E-04 (0.9%)              | 5.57 (44.3%)                           | 1.64 (44.4%)                          | 1.64 (44.3%)                          |
| 4f                        | w <sub>1</sub> , w <sub>7-26_40</sub> , w <sub>8-23_25</sub> , w <sub>9-66_25</sub>  | 0.54 | 1.02 | 3.50E-03  | 1.81E-04 (0.9%)              | 5.68 (46.8%)                           | 1.73 (46.9%)                          | 1.72 (46.8%)                          |
| 4g                        | w <sub>1</sub> , w <sub>8-23_25</sub> , w <sub>9-66_25</sub> , w <sub>10-10_80</sub> | 0.48 | 1.02 | 3.45E-03  | 1.64E-04 (0.9%)              | 5.44 (24.4%)                           | 0.87 (24.4%)                          | 0.87 (24.3%)                          |

Table S5: Errors of all five-combination clustersets tested

| 5-combination clustersets |                                                                                                       |      |      |           | Mean Absolute Error          |                                        |                                       |                                       |
|---------------------------|-------------------------------------------------------------------------------------------------------|------|------|-----------|------------------------------|----------------------------------------|---------------------------------------|---------------------------------------|
| Set                       | Clusterset                                                                                            | amf  | bxv  | QCE error | Volume<br>(dm <sup>3</sup> ) | $\Delta S$<br>(J mol K <sup>-1</sup> ) | $\Delta H$<br>(kJ mol <sup>-1</sup> ) | $\Delta U$<br>(kJ mol <sup>-1</sup> ) |
| 5a                        | w <sub>1</sub> , w <sub>2</sub> , w <sub>3-86_25</sub> , w <sub>8-23_25</sub> , w <sub>9-66_25</sub>  | 0.48 | 1.02 | 3.45E-03  | 1.47E-04 (0.8%)              | 5.90 (48.5%)                           | 1.80 (48.5%)                          | 1.79 (48.4%)                          |
| 5b                        | w <sub>1</sub> , w <sub>2</sub> , w <sub>4-100_40</sub> , w <sub>8-23_25</sub> , w <sub>9-66_25</sub> | 0.46 | 1.00 | 3.45E-03  | 1.47E-04 (0.8%)              | 5.83 (47.4%)                           | 1.75 (47.4%)                          | 1.75 (47.3%)                          |
| 5c                        | w <sub>1</sub> , w <sub>2</sub> , w <sub>5-5_40</sub> , w <sub>8-23_25</sub> , w <sub>9-66_25</sub>   | 0.44 | 1.01 | 3.46E-03  | 1.58E-04 (0.8%)              | 5.48 (40.0%)                           | 1.43 (39.9%)                          | 1.43 (39.8%)                          |
| 5d                        | w <sub>1</sub> , w <sub>2</sub> , w <sub>6-13_80</sub> , w <sub>8-23_25</sub> , w <sub>9-66_25</sub>  | 0.42 | 1.01 | 3.48E-03  | 1.77E-04 (0.9%)              | 5.57 (41.8%)                           | 1.52 (41.8%)                          | 1.52 (41.7%)                          |
| 5e                        | w <sub>1</sub> , w <sub>2</sub> , w <sub>7-26_40</sub> , w <sub>8-23_25</sub> , w <sub>9-66_25</sub>  | 0.40 | 1.00 | 3.47E-03  | 1.66E-04 (0.9%)              | 5.48 (45.7%)                           | 1.67 (45.6%)                          | 1.67 (45.6%)                          |
| 5f                        | w <sub>1</sub> , w <sub>2</sub> , w <sub>8-23_25</sub> , w <sub>9-66_25</sub> , w <sub>10-10_80</sub> | 0.54 | 1.02 | 3.50E-03  | 1.81E-04 (0.9%)              | 5.68 (16.9%)                           | 0.49 (16.7%)                          | 0.49 (16.6%)                          |

## 5 Errors of best 37 complete sets

Table S6: Error of best 37 complete full sets.

| Best 37 full sets |      |      |           | Mean Absolute Error          |                                        |                                       |                                       |
|-------------------|------|------|-----------|------------------------------|----------------------------------------|---------------------------------------|---------------------------------------|
| Set               | amf  | bxv  | QCE error | Volume<br>(dm <sup>3</sup> ) | $\Delta S$<br>(J mol K <sup>-1</sup> ) | $\Delta H$<br>(kJ mol <sup>-1</sup> ) | $\Delta U$<br>(kJ mol <sup>-1</sup> ) |
| set346            | 0.44 | 1.01 | 3.41E-03  | 1.34E-04 (0.7%)              | 0.21 (2.9%)                            | 0.07 (3.1%)                           | 0.07 (3.0%)                           |
| set345            | 0.44 | 1.01 | 3.41E-03  | 1.33E-04 (0.7%)              | 0.24 (3.1%)                            | 0.08 (3.3%)                           | 0.08 (3.2%)                           |
| set347            | 0.44 | 1.01 | 3.41E-03  | 1.35E-04 (0.7%)              | 0.27 (3.1%)                            | 0.08 (3.2%)                           | 0.08 (3.1%)                           |
| set349            | 0.44 | 1.01 | 3.41E-03  | 1.33E-04 (0.7%)              | 0.30 (3.4%)                            | 0.10 (3.6%)                           | 0.10 (3.5%)                           |
| set363            | 0.44 | 1.01 | 3.41E-03  | 1.35E-04 (0.7%)              | 0.29 (3.4%)                            | 0.09 (3.6%)                           | 0.09 (3.6%)                           |
| set352            | 0.44 | 1.01 | 3.41E-03  | 1.33E-04 (0.7%)              | 0.31 (3.4%)                            | 0.10 (3.6%)                           | 0.10 (3.6%)                           |
| set350            | 0.44 | 1.01 | 3.41E-03  | 1.33E-04 (0.7%)              | 0.31 (3.4%)                            | 0.10 (3.6%)                           | 0.10 (3.6%)                           |
| set351            | 0.44 | 1.01 | 3.41E-03  | 1.33E-04 (0.7%)              | 0.31 (3.5%)                            | 0.10 (3.6%)                           | 0.10 (3.6%)                           |
| set348            | 0.44 | 1.01 | 3.41E-03  | 1.34E-04 (0.7%)              | 0.32 (3.4%)                            | 0.10 (3.5%)                           | 0.10 (3.5%)                           |
| set353            | 0.44 | 1.01 | 3.41E-03  | 1.33E-04 (0.7%)              | 0.32 (3.5%)                            | 0.10 (3.7%)                           | 0.10 (3.6%)                           |
| set357            | 0.44 | 1.01 | 3.41E-03  | 1.33E-04 (0.7%)              | 0.33 (3.5%)                            | 0.10 (3.7%)                           | 0.10 (3.6%)                           |
| set354            | 0.44 | 1.01 | 3.41E-03  | 1.33E-04 (0.7%)              | 0.33 (3.6%)                            | 0.10 (3.7%)                           | 0.11 (3.7%)                           |
| set355            | 0.44 | 1.01 | 3.41E-03  | 1.33E-04 (0.7%)              | 0.34 (3.6%)                            | 0.11 (3.7%)                           | 0.11 (3.7%)                           |
| set362            | 0.44 | 1.01 | 3.41E-03  | 1.34E-04 (0.7%)              | 0.33 (3.6%)                            | 0.10 (3.8%)                           | 0.10 (3.8%)                           |
| set364            | 0.44 | 1.01 | 3.41E-03  | 1.36E-04 (0.7%)              | 0.36 (3.6%)                            | 0.11 (3.8%)                           | 0.11 (3.7%)                           |
| set366            | 0.44 | 1.01 | 3.41E-03  | 1.34E-04 (0.7%)              | 0.39 (3.9%)                            | 0.12 (4.1%)                           | 0.12 (4.1%)                           |

|        |      |      |          |                 |             |             |             |
|--------|------|------|----------|-----------------|-------------|-------------|-------------|
| set369 | 0.44 | 1.01 | 3.41E-03 | 1.34E-04 (0.7%) | 0.40 (4.0%) | 0.13 (4.2%) | 0.13 (4.1%) |
| set367 | 0.44 | 1.01 | 3.41E-03 | 1.34E-04 (0.7%) | 0.40 (4.0%) | 0.13 (4.2%) | 0.13 (4.1%) |
| set368 | 0.44 | 1.01 | 3.41E-03 | 1.34E-04 (0.7%) | 0.40 (4.0%) | 0.13 (4.2%) | 0.13 (4.1%) |
| set365 | 0.44 | 1.01 | 3.41E-03 | 1.35E-04 (0.7%) | 0.41 (4.0%) | 0.13 (4.1%) | 0.13 (4.1%) |
| set370 | 0.44 | 1.01 | 3.41E-03 | 1.34E-04 (0.7%) | 0.41 (4.0%) | 0.13 (4.2%) | 0.13 (4.2%) |
| set374 | 0.44 | 1.01 | 3.41E-03 | 1.34E-04 (0.7%) | 0.41 (4.0%) | 0.13 (4.2%) | 0.13 (4.2%) |
| set371 | 0.44 | 1.01 | 3.41E-03 | 1.34E-04 (0.7%) | 0.42 (4.1%) | 0.13 (4.3%) | 0.13 (4.2%) |
| set372 | 0.44 | 1.01 | 3.41E-03 | 1.34E-04 (0.7%) | 0.42 (4.1%) | 0.13 (4.3%) | 0.13 (4.3%) |
| set356 | 0.44 | 1.01 | 3.41E-03 | 1.35E-04 (0.7%) | 0.46 (4.2%) | 0.14 (4.4%) | 0.14 (4.3%) |
| set448 | 0.44 | 1.01 | 3.41E-03 | 1.34E-04 (0.7%) | 0.34 (3.6%) | 0.11 (3.7%) | 0.11 (3.7%) |
| set447 | 0.44 | 1.01 | 3.41E-03 | 1.34E-04 (0.7%) | 0.37 (3.8%) | 0.12 (3.9%) | 0.12 (3.9%) |
| set449 | 0.44 | 1.01 | 3.41E-03 | 1.35E-04 (0.7%) | 0.41 (3.9%) | 0.12 (4.0%) | 0.13 (4.0%) |
| set451 | 0.44 | 1.01 | 3.41E-03 | 1.34E-04 (0.7%) | 0.44 (4.1%) | 0.14 (4.3%) | 0.14 (4.3%) |
| set452 | 0.44 | 1.01 | 3.41E-03 | 1.34E-04 (0.7%) | 0.45 (4.2%) | 0.14 (4.4%) | 0.14 (4.3%) |
| set454 | 0.44 | 1.01 | 3.41E-03 | 1.34E-04 (0.7%) | 0.45 (4.2%) | 0.14 (4.4%) | 0.14 (4.3%) |
| set453 | 0.44 | 1.01 | 3.41E-03 | 1.34E-04 (0.7%) | 0.45 (4.2%) | 0.14 (4.4%) | 0.14 (4.3%) |
| set455 | 0.44 | 1.01 | 3.41E-03 | 1.34E-04 (0.7%) | 0.46 (4.3%) | 0.14 (4.4%) | 0.14 (4.4%) |
| set450 | 0.44 | 1.01 | 3.41E-03 | 1.35E-04 (0.7%) | 0.46 (4.2%) | 0.14 (4.4%) | 0.14 (4.3%) |
| set459 | 0.44 | 1.01 | 3.41E-03 | 1.34E-04 (0.7%) | 0.46 (4.3%) | 0.14 (4.4%) | 0.15 (4.4%) |
| set456 | 0.44 | 1.01 | 3.41E-03 | 1.34E-04 (0.7%) | 0.47 (4.3%) | 0.15 (4.5%) | 0.15 (4.4%) |
| set457 | 0.44 | 1.01 | 3.41E-03 | 1.34E-04 (0.7%) | 0.47 (4.3%) | 0.15 (4.5%) | 0.15 (4.5%) |



## 6 Population Plots of sets A to E.

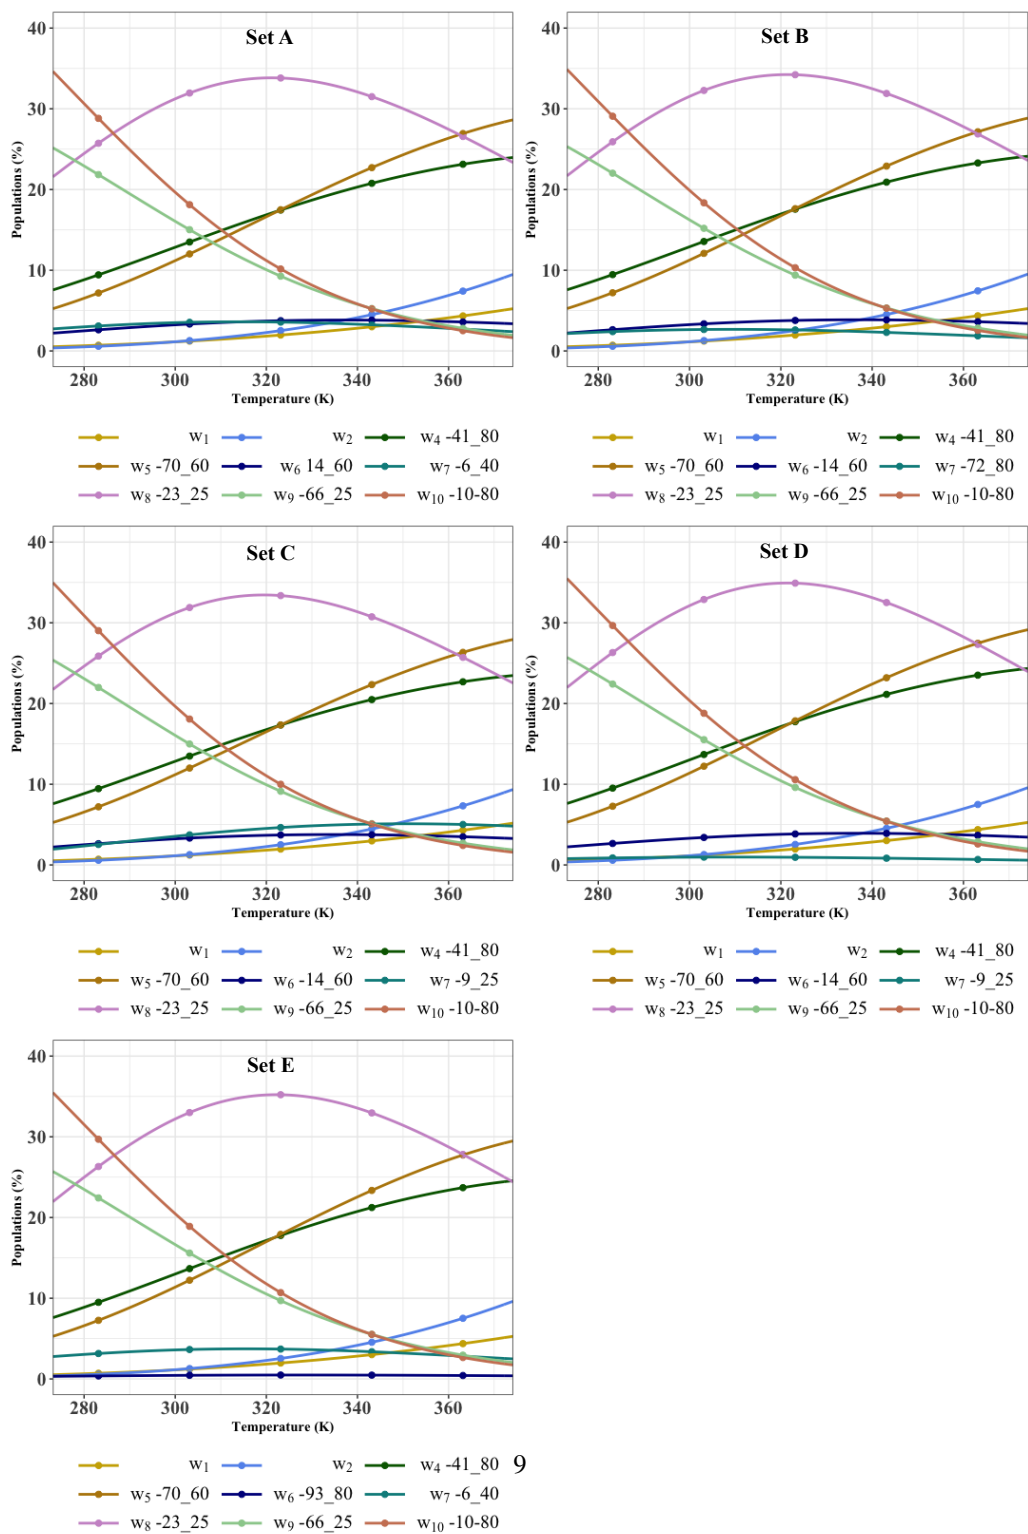

Figure S1: Population plots of set A, B, C, D and E.

## 7 Errors of all complete 459 clustersets

Note: Sets 346, 347, 345, 348 and 349 correspond to sets A, B, C, D and E in the text.

Table S7: Error of all 459 complete sets tested throughout this work

| 459 complete sets |      |      |           | Mean Absolute Error          |                                        |                                       |                                       |
|-------------------|------|------|-----------|------------------------------|----------------------------------------|---------------------------------------|---------------------------------------|
| Set               | amf  | bxv  | QCE error | Volume<br>(dm <sup>3</sup> ) | $\Delta S$<br>(J mol K <sup>-1</sup> ) | $\Delta H$<br>(kJ mol <sup>-1</sup> ) | $\Delta U$<br>(kJ mol <sup>-1</sup> ) |
| set346            | 0.44 | 1.01 | 3.41E-03  | 1.34E-04 (0.7%)              | 0.22 (2.9%)                            | 0.07 (3.1%)                           | 0.07 (3.1%)                           |
| set347            | 0.44 | 1.01 | 3.41E-03  | 1.35E-04 (0.7%)              | 0.27 (3.1%)                            | 0.09 (3.2%)                           | 0.09 (3.2%)                           |
| set345            | 0.44 | 1.01 | 3.41E-03  | 1.33E-04 (0.7%)              | 0.25 (3.1%)                            | 0.08 (3.3%)                           | 0.08 (3.3%)                           |
| set348            | 0.44 | 1.01 | 3.41E-03  | 1.34E-04 (0.7%)              | 0.33 (3.4%)                            | 0.10 (3.6%)                           | 0.11 (3.5%)                           |
| set349            | 0.44 | 1.01 | 3.41E-03  | 1.33E-04 (0.7%)              | 0.31 (3.4%)                            | 0.10 (3.6%)                           | 0.10 (3.6%)                           |
| set363            | 0.44 | 1.01 | 3.41E-03  | 1.35E-04 (0.7%)              | 0.30 (3.4%)                            | 0.10 (3.7%)                           | 0.10 (3.6%)                           |
| set352            | 0.44 | 1.01 | 3.41E-03  | 1.33E-04 (0.7%)              | 0.32 (3.4%)                            | 0.10 (3.7%)                           | 0.10 (3.6%)                           |
| set350            | 0.44 | 1.01 | 3.41E-03  | 1.33E-04 (0.7%)              | 0.32 (3.4%)                            | 0.10 (3.7%)                           | 0.10 (3.6%)                           |
| set351            | 0.44 | 1.01 | 3.41E-03  | 1.33E-04 (0.7%)              | 0.32 (3.5%)                            | 0.10 (3.7%)                           | 0.10 (3.6%)                           |
| set357            | 0.44 | 1.01 | 3.41E-03  | 1.33E-04 (0.7%)              | 0.33 (3.5%)                            | 0.11 (3.7%)                           | 0.11 (3.6%)                           |
| set353            | 0.44 | 1.01 | 3.41E-03  | 1.33E-04 (0.7%)              | 0.33 (3.5%)                            | 0.11 (3.7%)                           | 0.11 (3.7%)                           |
| set354            | 0.44 | 1.01 | 3.41E-03  | 1.33E-04 (0.7%)              | 0.34 (3.6%)                            | 0.11 (3.8%)                           | 0.11 (3.7%)                           |
| set448            | 0.44 | 1.01 | 3.41E-03  | 1.34E-04 (0.7%)              | 0.34 (3.6%)                            | 0.11 (3.8%)                           | 0.11 (3.7%)                           |
| set355            | 0.44 | 1.01 | 3.41E-03  | 1.33E-04 (0.7%)              | 0.34 (3.6%)                            | 0.11 (3.8%)                           | 0.11 (3.7%)                           |
| set364            | 0.44 | 1.01 | 3.41E-03  | 1.36E-04 (0.7%)              | 0.36 (3.6%)                            | 0.12 (3.8%)                           | 0.12 (3.8%)                           |
| set362            | 0.44 | 1.01 | 3.41E-03  | 1.34E-04 (0.7%)              | 0.33 (3.6%)                            | 0.11 (3.9%)                           | 0.11 (3.8%)                           |
| set447            | 0.44 | 1.01 | 3.41E-03  | 1.34E-04 (0.7%)              | 0.37 (3.8%)                            | 0.12 (4.0%)                           | 0.12 (3.9%)                           |
| set449            | 0.44 | 1.01 | 3.41E-03  | 1.35E-04 (0.7%)              | 0.41 (3.9%)                            | 0.13 (4.0%)                           | 0.13 (4.0%)                           |
| set366            | 0.44 | 1.01 | 3.41E-03  | 1.34E-04 (0.7%)              | 0.39 (3.9%)                            | 0.13 (4.2%)                           | 0.13 (4.1%)                           |
| set365            | 0.44 | 1.01 | 3.41E-03  | 1.35E-04 (0.7%)              | 0.42 (4.0%)                            | 0.13 (4.2%)                           | 0.13 (4.1%)                           |
| set367            | 0.44 | 1.01 | 3.41E-03  | 1.34E-04 (0.7%)              | 0.40 (4.0%)                            | 0.13 (4.2%)                           | 0.13 (4.2%)                           |
| set369            | 0.44 | 1.01 | 3.41E-03  | 1.34E-04 (0.7%)              | 0.40 (4.0%)                            | 0.13 (4.2%)                           | 0.13 (4.2%)                           |
| set368            | 0.44 | 1.01 | 3.41E-03  | 1.34E-04 (0.7%)              | 0.40 (4.0%)                            | 0.13 (4.2%)                           | 0.13 (4.2%)                           |
| set374            | 0.44 | 1.01 | 3.41E-03  | 1.34E-04 (0.7%)              | 0.42 (4.0%)                            | 0.14 (4.3%)                           | 0.14 (4.2%)                           |
| set370            | 0.44 | 1.01 | 3.41E-03  | 1.34E-04 (0.7%)              | 0.41 (4.0%)                            | 0.13 (4.3%)                           | 0.14 (4.2%)                           |
| set371            | 0.44 | 1.01 | 3.41E-03  | 1.34E-04 (0.7%)              | 0.42 (4.1%)                            | 0.14 (4.3%)                           | 0.14 (4.3%)                           |
| set326            | 0.44 | 1.01 | 3.43E-03  | 1.45E-04 (0.8%)              | 0.52 (4.1%)                            | 0.17 (4.4%)                           | 0.17 (4.3%)                           |
| set372            | 0.44 | 1.01 | 3.41E-03  | 1.34E-04 (0.7%)              | 0.43 (4.1%)                            | 0.14 (4.4%)                           | 0.14 (4.3%)                           |
| set451            | 0.44 | 1.01 | 3.41E-03  | 1.34E-04 (0.7%)              | 0.44 (4.1%)                            | 0.14 (4.3%)                           | 0.14 (4.3%)                           |
| set454            | 0.44 | 1.01 | 3.41E-03  | 1.34E-04 (0.7%)              | 0.45 (4.2%)                            | 0.14 (4.4%)                           | 0.15 (4.4%)                           |
| set452            | 0.44 | 1.01 | 3.41E-03  | 1.34E-04 (0.7%)              | 0.45 (4.2%)                            | 0.14 (4.4%)                           | 0.15 (4.4%)                           |
| set453            | 0.44 | 1.01 | 3.41E-03  | 1.34E-04 (0.7%)              | 0.45 (4.2%)                            | 0.15 (4.4%)                           | 0.15 (4.4%)                           |
| set450            | 0.44 | 1.01 | 3.41E-03  | 1.35E-04 (0.7%)              | 0.47 (4.2%)                            | 0.15 (4.4%)                           | 0.15 (4.4%)                           |
| set356            | 0.44 | 1.01 | 3.41E-03  | 1.35E-04 (0.7%)              | 0.47 (4.2%)                            | 0.15 (4.4%)                           | 0.15 (4.4%)                           |
| set455            | 0.44 | 1.01 | 3.41E-03  | 1.34E-04 (0.7%)              | 0.46 (4.3%)                            | 0.15 (4.5%)                           | 0.15 (4.4%)                           |
| set459            | 0.44 | 1.01 | 3.41E-03  | 1.34E-04 (0.7%)              | 0.47 (4.3%)                            | 0.15 (4.5%)                           | 0.15 (4.4%)                           |
| set456            | 0.44 | 1.01 | 3.41E-03  | 1.34E-04 (0.7%)              | 0.47 (4.3%)                            | 0.15 (4.5%)                           | 0.15 (4.5%)                           |

|        |      |      |          |                 |             |             |             |
|--------|------|------|----------|-----------------|-------------|-------------|-------------|
| set329 | 0.44 | 1.01 | 3.41E-03 | 1.34E-04 (0.7%) | 0.47 (4.3%) | 0.14 (4.4%) | 0.14 (4.4%) |
| set457 | 0.44 | 1.01 | 3.41E-03 | 1.34E-04 (0.7%) | 0.48 (4.3%) | 0.15 (4.6%) | 0.15 (4.5%) |
| set312 | 0.44 | 1.01 | 3.42E-03 | 1.36E-04 (0.7%) | 0.32 (4.6%) | 0.10 (4.6%) | 0.10 (4.7%) |
| set328 | 0.44 | 1.01 | 3.41E-03 | 1.33E-04 (0.7%) | 0.51 (4.6%) | 0.15 (4.6%) | 0.16 (4.6%) |
| set311 | 0.44 | 1.01 | 3.42E-03 | 1.35E-04 (0.7%) | 0.32 (4.7%) | 0.10 (4.7%) | 0.10 (4.8%) |
| set373 | 0.44 | 1.01 | 3.41E-03 | 1.36E-04 (0.7%) | 0.56 (4.8%) | 0.18 (5.0%) | 0.18 (5.0%) |
| set315 | 0.44 | 1.01 | 3.42E-03 | 1.35E-04 (0.7%) | 0.33 (5.0%) | 0.10 (5.0%) | 0.11 (5.1%) |
| set330 | 0.44 | 1.01 | 3.42E-03 | 1.34E-04 (0.7%) | 0.54 (5.0%) | 0.16 (5.0%) | 0.16 (5.0%) |
| set316 | 0.44 | 1.01 | 3.42E-03 | 1.35E-04 (0.7%) | 0.34 (5.0%) | 0.10 (5.0%) | 0.11 (5.1%) |
| set318 | 0.44 | 1.01 | 3.42E-03 | 1.35E-04 (0.7%) | 0.34 (5.0%) | 0.11 (5.0%) | 0.11 (5.1%) |
| set317 | 0.44 | 1.01 | 3.42E-03 | 1.35E-04 (0.7%) | 0.34 (5.0%) | 0.11 (5.0%) | 0.11 (5.1%) |
| set332 | 0.44 | 1.01 | 3.41E-03 | 1.33E-04 (0.7%) | 0.58 (5.1%) | 0.18 (5.2%) | 0.18 (5.2%) |
| set313 | 0.44 | 1.01 | 3.42E-03 | 1.36E-04 (0.7%) | 0.35 (5.1%) | 0.11 (5.1%) | 0.11 (5.2%) |
| set319 | 0.44 | 1.01 | 3.42E-03 | 1.35E-04 (0.7%) | 0.34 (5.1%) | 0.11 (5.1%) | 0.11 (5.2%) |
| set320 | 0.44 | 1.01 | 3.42E-03 | 1.35E-04 (0.7%) | 0.34 (5.1%) | 0.11 (5.1%) | 0.11 (5.2%) |
| set333 | 0.44 | 1.01 | 3.41E-03 | 1.33E-04 (0.7%) | 0.59 (5.1%) | 0.18 (5.2%) | 0.18 (5.2%) |
| set335 | 0.44 | 1.01 | 3.41E-03 | 1.33E-04 (0.7%) | 0.59 (5.1%) | 0.18 (5.2%) | 0.18 (5.2%) |
| set458 | 0.44 | 1.01 | 3.42E-03 | 1.36E-04 (0.7%) | 0.61 (5.1%) | 0.19 (5.3%) | 0.19 (5.3%) |
| set334 | 0.44 | 1.01 | 3.41E-03 | 1.33E-04 (0.7%) | 0.59 (5.2%) | 0.18 (5.2%) | 0.18 (5.2%) |
| set323 | 0.44 | 1.01 | 3.42E-03 | 1.35E-04 (0.7%) | 0.35 (5.2%) | 0.11 (5.1%) | 0.11 (5.2%) |
| set321 | 0.44 | 1.01 | 3.42E-03 | 1.35E-04 (0.7%) | 0.35 (5.2%) | 0.11 (5.1%) | 0.11 (5.2%) |
| set445 | 0.44 | 1.01 | 3.43E-03 | 1.46E-04 (0.8%) | 0.60 (5.2%) | 0.19 (5.4%) | 0.19 (5.3%) |
| set314 | 0.44 | 1.01 | 3.42E-03 | 1.36E-04 (0.7%) | 0.35 (5.2%) | 0.11 (5.2%) | 0.11 (5.3%) |
| set336 | 0.44 | 1.01 | 3.41E-03 | 1.33E-04 (0.7%) | 0.60 (5.2%) | 0.18 (5.3%) | 0.19 (5.3%) |
| set308 | 0.44 | 1.01 | 3.43E-03 | 1.42E-04 (0.8%) | 0.67 (5.3%) | 0.21 (5.6%) | 0.21 (5.5%) |
| set340 | 0.44 | 1.01 | 3.41E-03 | 1.33E-04 (0.7%) | 0.61 (5.3%) | 0.18 (5.4%) | 0.19 (5.4%) |
| set337 | 0.44 | 1.01 | 3.41E-03 | 1.33E-04 (0.7%) | 0.62 (5.3%) | 0.19 (5.4%) | 0.19 (5.4%) |
| set338 | 0.44 | 1.01 | 3.41E-03 | 1.33E-04 (0.7%) | 0.62 (5.3%) | 0.19 (5.4%) | 0.19 (5.4%) |
| set331 | 0.44 | 1.01 | 3.42E-03 | 1.34E-04 (0.7%) | 0.60 (5.4%) | 0.18 (5.4%) | 0.18 (5.4%) |
| set325 | 0.44 | 1.01 | 3.42E-03 | 1.40E-04 (0.8%) | 0.48 (5.4%) | 0.14 (5.5%) | 0.14 (5.4%) |
| set360 | 0.44 | 1.01 | 3.43E-03 | 1.46E-04 (0.8%) | 0.64 (5.6%) | 0.20 (5.8%) | 0.20 (5.7%) |
| set322 | 0.44 | 1.01 | 3.42E-03 | 1.36E-04 (0.7%) | 0.38 (5.7%) | 0.12 (5.6%) | 0.12 (5.8%) |
| set343 | 0.44 | 1.01 | 3.43E-03 | 1.46E-04 (0.8%) | 0.71 (6.1%) | 0.22 (6.3%) | 0.22 (6.2%) |
| set309 | 0.44 | 1.01 | 3.44E-03 | 1.46E-04 (0.8%) | 0.85 (6.1%) | 0.28 (6.4%) | 0.28 (6.4%) |
| set339 | 0.44 | 1.01 | 3.42E-03 | 1.35E-04 (0.7%) | 0.73 (6.4%) | 0.22 (6.4%) | 0.22 (6.4%) |
| set444 | 0.44 | 1.01 | 3.42E-03 | 1.40E-04 (0.8%) | 0.64 (7.2%) | 0.19 (7.2%) | 0.19 (7.1%) |
| set327 | 0.44 | 1.01 | 3.44E-03 | 1.49E-04 (0.8%) | 0.98 (7.7%) | 0.31 (8.0%) | 0.31 (7.8%) |
| set359 | 0.44 | 1.01 | 3.42E-03 | 1.40E-04 (0.8%) | 0.70 (7.7%) | 0.20 (7.7%) | 0.20 (7.6%) |
| set342 | 0.44 | 1.01 | 3.42E-03 | 1.40E-04 (0.8%) | 0.75 (8.0%) | 0.22 (8.1%) | 0.22 (8.0%) |
| set35  | 0.42 | 1.01 | 3.41E-03 | 1.27E-04 (0.7%) | 0.98 (8.3%) | 0.33 (8.7%) | 0.33 (8.8%) |
| set52  | 0.42 | 1.01 | 3.41E-03 | 1.26E-04 (0.7%) | 0.96 (8.4%) | 0.32 (8.7%) | 0.32 (8.8%) |
| set137 | 0.42 | 1.01 | 3.41E-03 | 1.27E-04 (0.7%) | 0.97 (8.4%) | 0.32 (8.8%) | 0.32 (8.9%) |
| set307 | 0.44 | 1.01 | 3.43E-03 | 1.45E-04 (0.8%) | 1.05 (8.6%) | 0.33 (8.8%) | 0.33 (8.7%) |
| set446 | 0.44 | 1.01 | 3.44E-03 | 1.50E-04 (0.8%) | 1.06 (8.6%) | 0.33 (8.8%) | 0.33 (8.7%) |
| set18  | 0.42 | 1.01 | 3.41E-03 | 1.28E-04 (0.7%) | 1.03 (8.7%) | 0.34 (9.0%) | 0.34 (9.1%) |

|        |      |      |          |                 |              |              |              |
|--------|------|------|----------|-----------------|--------------|--------------|--------------|
| set324 | 0.44 | 1.01 | 3.43E-03 | 1.44E-04 (0.8%) | 0.91 (8.7%)  | 0.28 (8.8%)  | 0.27 (8.7%)  |
| set310 | 0.44 | 1.01 | 3.44E-03 | 1.50E-04 (0.8%) | 1.24 (8.9%)  | 0.39 (9.3%)  | 0.39 (9.2%)  |
| set361 | 0.44 | 1.01 | 3.44E-03 | 1.50E-04 (0.8%) | 1.09 (8.9%)  | 0.34 (9.2%)  | 0.34 (9.1%)  |
| set36  | 0.42 | 1.01 | 3.41E-03 | 1.26E-04 (0.7%) | 0.93 (9.1%)  | 0.31 (9.4%)  | 0.31 (9.5%)  |
| set53  | 0.42 | 1.01 | 3.41E-03 | 1.26E-04 (0.7%) | 0.92 (9.2%)  | 0.31 (9.6%)  | 0.31 (9.7%)  |
| set138 | 0.42 | 1.01 | 3.41E-03 | 1.26E-04 (0.7%) | 0.92 (9.2%)  | 0.31 (9.6%)  | 0.31 (9.7%)  |
| set19  | 0.42 | 1.01 | 3.41E-03 | 1.27E-04 (0.7%) | 0.98 (9.4%)  | 0.33 (9.7%)  | 0.33 (9.8%)  |
| set344 | 0.44 | 1.01 | 3.44E-03 | 1.50E-04 (0.8%) | 1.15 (9.4%)  | 0.36 (9.6%)  | 0.36 (9.5%)  |
| set55  | 0.42 | 1.01 | 3.41E-03 | 1.29E-04 (0.7%) | 1.25 (9.7%)  | 0.41 (10.1%) | 0.41 (10.2%) |
| set38  | 0.42 | 1.01 | 3.41E-03 | 1.29E-04 (0.7%) | 1.29 (9.8%)  | 0.42 (10.2%) | 0.42 (10.3%) |
| set140 | 0.42 | 1.01 | 3.41E-03 | 1.29E-04 (0.7%) | 1.26 (9.8%)  | 0.42 (10.2%) | 0.42 (10.3%) |
| set1   | 0.42 | 1.01 | 3.42E-03 | 1.31E-04 (0.7%) | 1.36 (9.8%)  | 0.45 (10.2%) | 0.45 (10.3%) |
| set37  | 0.42 | 1.01 | 3.41E-03 | 1.28E-04 (0.7%) | 1.18 (10.0%) | 0.39 (10.4%) | 0.39 (10.5%) |
| set2   | 0.42 | 1.01 | 3.42E-03 | 1.31E-04 (0.7%) | 1.29 (10.0%) | 0.43 (10.4%) | 0.43 (10.5%) |
| set54  | 0.42 | 1.01 | 3.41E-03 | 1.28E-04 (0.7%) | 1.15 (10.0%) | 0.38 (10.4%) | 0.38 (10.5%) |
| set139 | 0.42 | 1.01 | 3.41E-03 | 1.28E-04 (0.7%) | 1.16 (10.1%) | 0.39 (10.5%) | 0.39 (10.6%) |
| set21  | 0.42 | 1.01 | 3.41E-03 | 1.30E-04 (0.7%) | 1.34 (10.1%) | 0.44 (10.5%) | 0.44 (10.6%) |
| set20  | 0.42 | 1.01 | 3.41E-03 | 1.29E-04 (0.7%) | 1.23 (10.3%) | 0.41 (10.7%) | 0.41 (10.8%) |
| set443 | 0.44 | 1.01 | 3.43E-03 | 1.44E-04 (0.8%) | 1.07 (10.3%) | 0.32 (10.3%) | 0.32 (10.2%) |
| set358 | 0.44 | 1.01 | 3.43E-03 | 1.44E-04 (0.8%) | 1.11 (10.7%) | 0.33 (10.8%) | 0.33 (10.7%) |
| set341 | 0.44 | 1.01 | 3.43E-03 | 1.44E-04 (0.8%) | 1.17 (11.1%) | 0.35 (11.1%) | 0.35 (11.0%) |
| set157 | 0.42 | 1.01 | 3.42E-03 | 1.30E-04 (0.7%) | 0.78 (11.3%) | 0.25 (11.4%) | 0.25 (11.5%) |
| set6   | 0.42 | 1.01 | 3.42E-03 | 1.31E-04 (0.7%) | 1.33 (11.4%) | 0.44 (11.9%) | 0.44 (12.0%) |
| set40  | 0.44 | 1.05 | 7.37E-03 | 7.35E-04 (4.0%) | 1.01 (11.4%) | 0.34 (11.8%) | 0.34 (11.9%) |
| set3   | 0.42 | 1.01 | 3.42E-03 | 1.32E-04 (0.7%) | 1.58 (11.4%) | 0.51 (11.9%) | 0.51 (11.9%) |
| set5   | 0.42 | 1.01 | 3.42E-03 | 1.31E-04 (0.7%) | 1.32 (11.4%) | 0.44 (11.9%) | 0.44 (12.0%) |
| set39  | 0.44 | 1.05 | 7.37E-03 | 7.35E-04 (4.0%) | 1.00 (11.5%) | 0.34 (11.9%) | 0.34 (12.0%) |
| set9   | 0.42 | 1.01 | 3.42E-03 | 1.31E-04 (0.7%) | 1.32 (11.5%) | 0.44 (12.0%) | 0.44 (12.1%) |
| set11  | 0.42 | 1.01 | 3.42E-03 | 1.31E-04 (0.7%) | 1.32 (11.6%) | 0.44 (12.1%) | 0.44 (12.2%) |
| set12  | 0.42 | 1.01 | 3.42E-03 | 1.31E-04 (0.7%) | 1.32 (11.6%) | 0.44 (12.1%) | 0.44 (12.2%) |
| set10  | 0.42 | 1.01 | 3.42E-03 | 1.31E-04 (0.7%) | 1.32 (11.6%) | 0.44 (12.1%) | 0.44 (12.2%) |
| set7   | 0.42 | 1.01 | 3.42E-03 | 1.31E-04 (0.7%) | 1.35 (11.6%) | 0.45 (12.1%) | 0.45 (12.2%) |
| set41  | 0.44 | 1.05 | 7.36E-03 | 7.35E-04 (4.0%) | 1.03 (11.6%) | 0.34 (12.0%) | 0.34 (12.1%) |
| set13  | 0.42 | 1.01 | 3.42E-03 | 1.31E-04 (0.7%) | 1.32 (11.6%) | 0.44 (12.1%) | 0.44 (12.2%) |
| set14  | 0.42 | 1.01 | 3.42E-03 | 1.31E-04 (0.7%) | 1.32 (11.6%) | 0.44 (12.1%) | 0.44 (12.2%) |
| set15  | 0.42 | 1.01 | 3.42E-03 | 1.31E-04 (0.7%) | 1.32 (11.6%) | 0.44 (12.1%) | 0.44 (12.2%) |
| set17  | 0.42 | 1.01 | 3.42E-03 | 1.31E-04 (0.7%) | 1.33 (11.6%) | 0.44 (12.1%) | 0.44 (12.2%) |
| set8   | 0.42 | 1.01 | 3.42E-03 | 1.31E-04 (0.7%) | 1.34 (11.6%) | 0.45 (12.1%) | 0.45 (12.2%) |
| set23  | 0.44 | 1.05 | 7.36E-03 | 7.33E-04 (4.0%) | 1.06 (11.6%) | 0.35 (12.0%) | 0.35 (12.2%) |
| set43  | 0.46 | 1.09 | 1.52E-02 | 1.33E-03 (7.2%) | 1.01 (11.7%) | 0.34 (12.0%) | 0.34 (12.2%) |
| set16  | 0.42 | 1.01 | 3.42E-03 | 1.31E-04 (0.7%) | 1.34 (11.7%) | 0.45 (12.2%) | 0.45 (12.3%) |
| set42  | 0.46 | 1.09 | 1.52E-02 | 1.32E-03 (7.2%) | 1.03 (11.7%) | 0.34 (12.1%) | 0.34 (12.2%) |
| set22  | 0.46 | 1.09 | 1.52E-02 | 1.32E-03 (7.2%) | 1.06 (11.7%) | 0.35 (12.1%) | 0.35 (12.2%) |
| set46  | 0.46 | 1.09 | 1.52E-02 | 1.33E-03 (7.3%) | 1.01 (11.7%) | 0.34 (12.1%) | 0.34 (12.2%) |
| set44  | 0.46 | 1.09 | 1.52E-02 | 1.33E-03 (7.3%) | 1.01 (11.7%) | 0.34 (12.1%) | 0.34 (12.2%) |

|        |      |      |          |                 |              |              |              |
|--------|------|------|----------|-----------------|--------------|--------------|--------------|
| set45  | 0.46 | 1.09 | 1.52E-02 | 1.33E-03 (7.3%) | 1.01 (11.7%) | 0.34 (12.1%) | 0.34 (12.2%) |
| set142 | 0.46 | 1.09 | 1.52E-02 | 1.32E-03 (7.2%) | 1.01 (11.7%) | 0.34 (12.1%) | 0.34 (12.2%) |
| set57  | 0.44 | 1.05 | 7.37E-03 | 7.35E-04 (4.0%) | 1.00 (11.7%) | 0.33 (12.1%) | 0.33 (12.2%) |
| set47  | 0.46 | 1.09 | 1.52E-02 | 1.33E-03 (7.3%) | 1.01 (11.7%) | 0.34 (12.1%) | 0.34 (12.2%) |
| set49  | 0.46 | 1.10 | 1.89E-02 | 1.53E-03 (8.4%) | 1.02 (11.7%) | 0.34 (12.1%) | 0.34 (12.2%) |
| set51  | 0.46 | 1.09 | 1.52E-02 | 1.33E-03 (7.2%) | 1.02 (11.7%) | 0.34 (12.1%) | 0.34 (12.2%) |
| set4   | 0.42 | 1.01 | 3.42E-03 | 1.33E-04 (0.7%) | 1.69 (11.7%) | 0.55 (12.2%) | 0.54 (12.2%) |
| set48  | 0.46 | 1.09 | 1.52E-02 | 1.33E-03 (7.3%) | 1.01 (11.7%) | 0.34 (12.1%) | 0.34 (12.2%) |
| set56  | 0.46 | 1.09 | 1.52E-02 | 1.33E-03 (7.3%) | 1.00 (11.8%) | 0.33 (12.1%) | 0.33 (12.2%) |
| set24  | 0.46 | 1.09 | 1.52E-02 | 1.32E-03 (7.2%) | 1.08 (11.8%) | 0.36 (12.2%) | 0.36 (12.3%) |
| set50  | 0.46 | 1.09 | 1.52E-02 | 1.32E-03 (7.2%) | 1.03 (11.8%) | 0.34 (12.2%) | 0.34 (12.3%) |
| set141 | 0.46 | 1.09 | 1.52E-02 | 1.33E-03 (7.2%) | 1.01 (11.8%) | 0.34 (12.2%) | 0.34 (12.3%) |
| set26  | 0.46 | 1.10 | 1.89E-02 | 1.53E-03 (8.4%) | 1.06 (11.8%) | 0.36 (12.2%) | 0.36 (12.3%) |
| set143 | 0.46 | 1.10 | 1.89E-02 | 1.53E-03 (8.4%) | 1.03 (11.8%) | 0.35 (12.2%) | 0.35 (12.3%) |
| set58  | 0.46 | 1.09 | 1.52E-02 | 1.32E-03 (7.2%) | 1.02 (11.8%) | 0.34 (12.2%) | 0.34 (12.3%) |
| set25  | 0.46 | 1.10 | 1.89E-02 | 1.53E-03 (8.4%) | 1.08 (11.8%) | 0.36 (12.3%) | 0.36 (12.4%) |
| set28  | 0.46 | 1.10 | 1.89E-02 | 1.53E-03 (8.4%) | 1.07 (11.9%) | 0.36 (12.3%) | 0.36 (12.4%) |
| set27  | 0.46 | 1.10 | 1.89E-02 | 1.53E-03 (8.4%) | 1.07 (11.9%) | 0.36 (12.3%) | 0.36 (12.4%) |
| set29  | 0.46 | 1.10 | 1.89E-02 | 1.53E-03 (8.4%) | 1.07 (11.9%) | 0.36 (12.3%) | 0.36 (12.4%) |
| set30  | 0.46 | 1.10 | 1.89E-02 | 1.53E-03 (8.4%) | 1.07 (11.9%) | 0.36 (12.3%) | 0.36 (12.4%) |
| set34  | 0.46 | 1.10 | 1.89E-02 | 1.53E-03 (8.4%) | 1.07 (11.9%) | 0.36 (12.3%) | 0.36 (12.4%) |
| set31  | 0.46 | 1.10 | 1.89E-02 | 1.53E-03 (8.4%) | 1.07 (11.9%) | 0.36 (12.3%) | 0.36 (12.4%) |
| set60  | 0.46 | 1.10 | 1.89E-02 | 1.53E-03 (8.4%) | 1.00 (11.9%) | 0.34 (12.3%) | 0.34 (12.4%) |
| set32  | 0.46 | 1.10 | 1.89E-02 | 1.53E-03 (8.4%) | 1.07 (11.9%) | 0.36 (12.3%) | 0.36 (12.4%) |
| set59  | 0.46 | 1.10 | 1.89E-02 | 1.53E-03 (8.4%) | 1.02 (11.9%) | 0.34 (12.3%) | 0.34 (12.4%) |
| set33  | 0.46 | 1.10 | 1.89E-02 | 1.53E-03 (8.4%) | 1.08 (11.9%) | 0.36 (12.4%) | 0.36 (12.5%) |
| set63  | 0.46 | 1.10 | 1.89E-02 | 1.53E-03 (8.4%) | 1.01 (11.9%) | 0.34 (12.3%) | 0.34 (12.4%) |
| set62  | 0.46 | 1.10 | 1.89E-02 | 1.53E-03 (8.4%) | 1.01 (11.9%) | 0.34 (12.3%) | 0.34 (12.4%) |
| set145 | 0.46 | 1.10 | 1.89E-02 | 1.53E-03 (8.4%) | 1.01 (11.9%) | 0.34 (12.3%) | 0.34 (12.4%) |
| set61  | 0.46 | 1.10 | 1.89E-02 | 1.53E-03 (8.4%) | 1.01 (11.9%) | 0.34 (12.3%) | 0.34 (12.4%) |
| set144 | 0.46 | 1.10 | 1.89E-02 | 1.53E-03 (8.4%) | 1.03 (12.0%) | 0.34 (12.3%) | 0.34 (12.4%) |
| set146 | 0.46 | 1.10 | 1.89E-02 | 1.53E-03 (8.4%) | 1.01 (12.0%) | 0.34 (12.3%) | 0.34 (12.5%) |
| set147 | 0.46 | 1.10 | 1.89E-02 | 1.53E-03 (8.4%) | 1.01 (12.0%) | 0.34 (12.3%) | 0.34 (12.5%) |
| set66  | 0.46 | 1.11 | 2.31E-02 | 1.74E-03 (9.5%) | 1.01 (12.0%) | 0.34 (12.3%) | 0.34 (12.5%) |
| set64  | 0.46 | 1.10 | 1.89E-02 | 1.53E-03 (8.4%) | 1.01 (12.0%) | 0.34 (12.3%) | 0.34 (12.5%) |
| set148 | 0.46 | 1.10 | 1.89E-02 | 1.53E-03 (8.4%) | 1.01 (12.0%) | 0.34 (12.3%) | 0.34 (12.5%) |
| set68  | 0.46 | 1.10 | 1.89E-02 | 1.53E-03 (8.4%) | 1.01 (12.0%) | 0.34 (12.3%) | 0.34 (12.5%) |
| set150 | 0.46 | 1.11 | 2.31E-02 | 1.74E-03 (9.5%) | 1.02 (12.0%) | 0.34 (12.4%) | 0.34 (12.5%) |
| set149 | 0.46 | 1.10 | 1.89E-02 | 1.53E-03 (8.4%) | 1.02 (12.0%) | 0.34 (12.4%) | 0.34 (12.5%) |
| set151 | 0.46 | 1.11 | 2.31E-02 | 1.74E-03 (9.5%) | 1.02 (12.0%) | 0.34 (12.4%) | 0.34 (12.5%) |
| set65  | 0.46 | 1.10 | 1.89E-02 | 1.53E-03 (8.4%) | 1.01 (12.0%) | 0.34 (12.4%) | 0.34 (12.5%) |
| set152 | 0.46 | 1.11 | 2.31E-02 | 1.73E-03 (9.5%) | 1.03 (12.0%) | 0.35 (12.4%) | 0.35 (12.5%) |
| set153 | 0.46 | 1.10 | 1.89E-02 | 1.53E-03 (8.4%) | 1.02 (12.0%) | 0.34 (12.4%) | 0.34 (12.5%) |
| set67  | 0.46 | 1.10 | 1.89E-02 | 1.53E-03 (8.4%) | 1.02 (12.0%) | 0.34 (12.4%) | 0.34 (12.5%) |
| set154 | 0.42 | 1.01 | 3.41E-03 | 1.29E-04 (0.7%) | 0.87 (13.1%) | 0.26 (12.9%) | 0.26 (13.1%) |

|        |      |      |          |                 |              |              |              |
|--------|------|------|----------|-----------------|--------------|--------------|--------------|
| set156 | 0.60 | 1.01 | 6.91E-02 | 2.28E-04 (1.2%) | 0.95 (14.3%) | 0.29 (14.3%) | 0.29 (14.4%) |
| set174 | 0.46 | 1.11 | 2.27E-02 | 1.71E-03 (9.4%) | 0.95 (14.7%) | 0.28 (14.5%) | 0.28 (14.6%) |
| set191 | 0.46 | 1.11 | 2.27E-02 | 1.72E-03 (9.4%) | 1.00 (15.1%) | 0.29 (14.8%) | 0.29 (15.0%) |
| set155 | 0.60 | 1.02 | 6.49E-02 | 1.56E-04 (0.8%) | 1.11 (16.1%) | 0.32 (15.8%) | 0.32 (16.0%) |
| set293 | 0.60 | 1.00 | 6.17E-02 | 4.28E-04 (2.3%) | 1.17 (16.6%) | 0.33 (16.1%) | 0.33 (16.3%) |
| set208 | 0.60 | 1.01 | 6.11E-02 | 2.28E-04 (1.2%) | 1.18 (16.6%) | 0.33 (16.1%) | 0.33 (16.3%) |
| set171 | 0.60 | 1.00 | 5.79E-02 | 4.27E-04 (2.3%) | 1.43 (18.4%) | 0.39 (17.7%) | 0.39 (17.9%) |
| set188 | 0.60 | 1.01 | 5.61E-02 | 2.25E-04 (1.2%) | 1.51 (18.9%) | 0.41 (18.1%) | 0.41 (18.2%) |
| set173 | 0.60 | 1.02 | 6.36E-02 | 1.55E-04 (0.8%) | 1.34 (19.1%) | 0.38 (18.5%) | 0.38 (18.7%) |
| set290 | 0.60 | 1.01 | 5.61E-02 | 2.25E-04 (1.2%) | 1.57 (19.5%) | 0.43 (18.7%) | 0.43 (18.8%) |
| set190 | 0.60 | 1.02 | 6.23E-02 | 1.55E-04 (0.8%) | 1.42 (19.6%) | 0.39 (18.9%) | 0.39 (19.1%) |
| set205 | 0.60 | 1.02 | 5.60E-02 | 1.54E-04 (0.8%) | 1.58 (19.6%) | 0.43 (18.7%) | 0.43 (18.9%) |
| set292 | 0.60 | 1.02 | 6.23E-02 | 1.55E-04 (0.8%) | 1.48 (20.2%) | 0.41 (19.5%) | 0.41 (19.7%) |
| set207 | 0.60 | 1.00 | 6.17E-02 | 4.26E-04 (2.3%) | 1.51 (20.4%) | 0.42 (19.7%) | 0.42 (19.8%) |
| set160 | 0.60 | 1.02 | 6.76E-02 | 1.57E-04 (0.8%) | 1.39 (20.6%) | 0.40 (20.1%) | 0.40 (20.3%) |
| set159 | 0.60 | 1.02 | 6.76E-02 | 1.57E-04 (0.8%) | 1.40 (20.6%) | 0.40 (20.1%) | 0.40 (20.3%) |
| set161 | 0.60 | 1.02 | 6.76E-02 | 1.57E-04 (0.8%) | 1.42 (21.0%) | 0.40 (20.5%) | 0.40 (20.6%) |
| set158 | 0.60 | 1.00 | 6.69E-02 | 4.24E-04 (2.3%) | 1.45 (21.1%) | 0.41 (20.5%) | 0.41 (20.7%) |
| set169 | 0.60 | 1.02 | 6.76E-02 | 1.57E-04 (0.8%) | 1.43 (21.1%) | 0.41 (20.6%) | 0.41 (20.8%) |
| set162 | 0.60 | 1.02 | 6.76E-02 | 1.57E-04 (0.8%) | 1.44 (21.2%) | 0.41 (20.7%) | 0.41 (20.8%) |
| set163 | 0.60 | 1.02 | 6.76E-02 | 1.57E-04 (0.8%) | 1.45 (21.3%) | 0.41 (20.7%) | 0.41 (20.9%) |
| set165 | 0.60 | 1.02 | 6.76E-02 | 1.57E-04 (0.8%) | 1.45 (21.3%) | 0.41 (20.7%) | 0.41 (20.9%) |
| set170 | 0.60 | 1.02 | 6.76E-02 | 1.57E-04 (0.8%) | 1.44 (21.3%) | 0.41 (20.7%) | 0.41 (20.9%) |
| set164 | 0.60 | 1.02 | 6.76E-02 | 1.57E-04 (0.8%) | 1.45 (21.3%) | 0.41 (20.7%) | 0.41 (20.9%) |
| set166 | 0.60 | 1.02 | 6.76E-02 | 1.57E-04 (0.8%) | 1.45 (21.3%) | 0.41 (20.8%) | 0.41 (20.9%) |
| set167 | 0.60 | 1.02 | 6.76E-02 | 1.57E-04 (0.8%) | 1.46 (21.4%) | 0.41 (20.8%) | 0.41 (21.0%) |
| set168 | 0.60 | 1.02 | 6.76E-02 | 1.57E-04 (0.8%) | 1.46 (21.4%) | 0.41 (20.9%) | 0.41 (21.0%) |
| set172 | 0.60 | 1.00 | 5.91E-02 | 4.25E-04 (2.3%) | 1.75 (22.0%) | 0.47 (21.0%) | 0.47 (21.2%) |
| set189 | 0.60 | 1.00 | 5.79E-02 | 4.24E-04 (2.3%) | 1.85 (22.5%) | 0.50 (21.5%) | 0.50 (21.7%) |
| set291 | 0.60 | 1.01 | 5.73E-02 | 2.23E-04 (1.2%) | 1.91 (23.2%) | 0.52 (22.2%) | 0.52 (22.4%) |
| set206 | 0.60 | 1.01 | 5.73E-02 | 2.23E-04 (1.2%) | 1.93 (23.3%) | 0.52 (22.3%) | 0.52 (22.5%) |
| set177 | 0.60 | 1.02 | 6.23E-02 | 1.55E-04 (0.8%) | 2.18 (28.1%) | 0.58 (26.9%) | 0.58 (27.0%) |
| set176 | 0.60 | 1.00 | 6.16E-02 | 4.21E-04 (2.3%) | 2.24 (28.3%) | 0.60 (27.1%) | 0.60 (27.2%) |
| set178 | 0.60 | 1.02 | 6.23E-02 | 1.55E-04 (0.8%) | 2.23 (28.6%) | 0.59 (27.3%) | 0.60 (27.5%) |
| set175 | 0.60 | 1.00 | 6.16E-02 | 4.21E-04 (2.3%) | 2.27 (28.6%) | 0.61 (27.3%) | 0.61 (27.5%) |
| set186 | 0.60 | 1.02 | 6.23E-02 | 1.55E-04 (0.8%) | 2.24 (28.8%) | 0.60 (27.5%) | 0.60 (27.7%) |
| set194 | 0.60 | 1.02 | 6.10E-02 | 1.55E-04 (0.8%) | 2.31 (28.9%) | 0.62 (27.6%) | 0.62 (27.8%) |
| set187 | 0.60 | 1.02 | 6.23E-02 | 1.55E-04 (0.8%) | 2.27 (29.0%) | 0.61 (27.7%) | 0.61 (27.9%) |
| set193 | 0.60 | 1.00 | 6.04E-02 | 4.21E-04 (2.3%) | 2.37 (29.1%) | 0.64 (27.8%) | 0.64 (28.0%) |
| set179 | 0.60 | 1.00 | 6.16E-02 | 4.21E-04 (2.3%) | 2.31 (29.1%) | 0.62 (27.8%) | 0.62 (28.0%) |
| set182 | 0.60 | 1.00 | 6.16E-02 | 4.21E-04 (2.3%) | 2.32 (29.2%) | 0.62 (27.9%) | 0.62 (28.1%) |
| set180 | 0.60 | 1.00 | 6.16E-02 | 4.21E-04 (2.3%) | 2.32 (29.2%) | 0.62 (27.9%) | 0.62 (28.1%) |
| set181 | 0.60 | 1.00 | 6.16E-02 | 4.21E-04 (2.3%) | 2.32 (29.2%) | 0.62 (27.9%) | 0.62 (28.1%) |
| set183 | 0.60 | 1.00 | 6.16E-02 | 4.21E-04 (2.3%) | 2.32 (29.3%) | 0.62 (28.0%) | 0.62 (28.1%) |
| set192 | 0.60 | 1.00 | 6.04E-02 | 4.21E-04 (2.3%) | 2.40 (29.4%) | 0.65 (28.1%) | 0.65 (28.3%) |

|        |      |      |          |                 |              |              |              |
|--------|------|------|----------|-----------------|--------------|--------------|--------------|
| set184 | 0.60 | 1.00 | 6.16E-02 | 4.21E-04 (2.3%) | 2.33 (29.4%) | 0.62 (28.1%) | 0.63 (28.2%) |
| set195 | 0.60 | 1.02 | 6.10E-02 | 1.55E-04 (0.8%) | 2.36 (29.4%) | 0.63 (28.1%) | 0.63 (28.3%) |
| set185 | 0.60 | 1.00 | 6.16E-02 | 4.21E-04 (2.3%) | 2.33 (29.4%) | 0.62 (28.1%) | 0.63 (28.2%) |
| set203 | 0.60 | 1.02 | 6.10E-02 | 1.55E-04 (0.8%) | 2.37 (29.6%) | 0.64 (28.3%) | 0.64 (28.4%) |
| set196 | 0.60 | 1.02 | 6.10E-02 | 1.55E-04 (0.8%) | 2.40 (29.7%) | 0.65 (28.4%) | 0.65 (28.6%) |
| set197 | 0.60 | 1.02 | 6.10E-02 | 1.55E-04 (0.8%) | 2.41 (29.8%) | 0.65 (28.5%) | 0.65 (28.6%) |
| set199 | 0.60 | 1.02 | 6.10E-02 | 1.55E-04 (0.8%) | 2.41 (29.8%) | 0.65 (28.5%) | 0.65 (28.6%) |
| set296 | 0.60 | 1.02 | 6.10E-02 | 1.55E-04 (0.8%) | 2.39 (29.8%) | 0.64 (28.5%) | 0.64 (28.6%) |
| set198 | 0.60 | 1.02 | 6.10E-02 | 1.55E-04 (0.8%) | 2.41 (29.8%) | 0.65 (28.5%) | 0.65 (28.7%) |
| set204 | 0.60 | 1.02 | 6.10E-02 | 1.55E-04 (0.8%) | 2.41 (29.8%) | 0.65 (28.5%) | 0.65 (28.7%) |
| set200 | 0.60 | 1.02 | 6.10E-02 | 1.55E-04 (0.8%) | 2.42 (29.9%) | 0.65 (28.6%) | 0.65 (28.7%) |
| set211 | 0.60 | 1.02 | 6.10E-02 | 1.54E-04 (0.8%) | 2.41 (29.9%) | 0.65 (28.6%) | 0.65 (28.8%) |
| set295 | 0.60 | 1.00 | 6.04E-02 | 4.21E-04 (2.3%) | 2.45 (30.0%) | 0.66 (28.6%) | 0.66 (28.8%) |
| set201 | 0.60 | 1.02 | 6.10E-02 | 1.55E-04 (0.8%) | 2.42 (30.0%) | 0.65 (28.6%) | 0.65 (28.8%) |
| set202 | 0.60 | 1.02 | 6.10E-02 | 1.55E-04 (0.8%) | 2.43 (30.0%) | 0.65 (28.7%) | 0.65 (28.9%) |
| set210 | 0.60 | 1.01 | 5.98E-02 | 2.20E-04 (1.2%) | 2.46 (30.0%) | 0.66 (28.7%) | 0.66 (28.9%) |
| set294 | 0.60 | 1.00 | 6.04E-02 | 4.21E-04 (2.3%) | 2.48 (30.3%) | 0.67 (28.9%) | 0.67 (29.1%) |
| set297 | 0.60 | 1.02 | 6.10E-02 | 1.55E-04 (0.8%) | 2.44 (30.3%) | 0.65 (28.9%) | 0.66 (29.1%) |
| set209 | 0.60 | 1.01 | 5.98E-02 | 2.20E-04 (1.2%) | 2.49 (30.3%) | 0.67 (29.0%) | 0.67 (29.2%) |
| set305 | 0.60 | 1.02 | 6.10E-02 | 1.55E-04 (0.8%) | 2.45 (30.5%) | 0.66 (29.1%) | 0.66 (29.3%) |
| set212 | 0.60 | 1.00 | 6.04E-02 | 4.21E-04 (2.3%) | 2.50 (30.6%) | 0.67 (29.3%) | 0.68 (29.5%) |
| set220 | 0.60 | 1.02 | 6.10E-02 | 1.55E-04 (0.8%) | 2.48 (30.7%) | 0.67 (29.3%) | 0.67 (29.5%) |
| set298 | 0.60 | 1.00 | 6.04E-02 | 4.20E-04 (2.3%) | 2.52 (30.8%) | 0.68 (29.5%) | 0.68 (29.6%) |
| set213 | 0.60 | 1.01 | 5.98E-02 | 2.19E-04 (1.2%) | 2.53 (30.9%) | 0.68 (29.5%) | 0.68 (29.7%) |
| set301 | 0.60 | 1.00 | 6.04E-02 | 4.20E-04 (2.3%) | 2.53 (30.9%) | 0.68 (29.5%) | 0.68 (29.7%) |
| set299 | 0.60 | 1.00 | 6.04E-02 | 4.20E-04 (2.3%) | 2.53 (30.9%) | 0.68 (29.5%) | 0.68 (29.7%) |
| set300 | 0.60 | 1.00 | 6.04E-02 | 4.20E-04 (2.3%) | 2.53 (30.9%) | 0.68 (29.5%) | 0.68 (29.7%) |
| set306 | 0.60 | 1.00 | 6.04E-02 | 4.20E-04 (2.3%) | 2.53 (30.9%) | 0.68 (29.6%) | 0.68 (29.7%) |
| set216 | 0.60 | 1.01 | 5.98E-02 | 2.19E-04 (1.2%) | 2.53 (30.9%) | 0.68 (29.6%) | 0.69 (29.8%) |
| set214 | 0.60 | 1.01 | 5.98E-02 | 2.19E-04 (1.2%) | 2.54 (30.9%) | 0.68 (29.6%) | 0.69 (29.8%) |
| set215 | 0.60 | 1.01 | 5.98E-02 | 2.19E-04 (1.2%) | 2.54 (30.9%) | 0.68 (29.6%) | 0.69 (29.8%) |
| set302 | 0.60 | 1.00 | 6.04E-02 | 4.20E-04 (2.3%) | 2.54 (31.0%) | 0.68 (29.6%) | 0.69 (29.8%) |
| set217 | 0.60 | 1.01 | 5.98E-02 | 2.19E-04 (1.2%) | 2.54 (31.0%) | 0.69 (29.7%) | 0.69 (29.9%) |
| set221 | 0.60 | 1.00 | 6.04E-02 | 4.20E-04 (2.3%) | 2.55 (31.0%) | 0.69 (29.7%) | 0.69 (29.9%) |
| set303 | 0.60 | 1.00 | 6.04E-02 | 4.20E-04 (2.3%) | 2.55 (31.1%) | 0.69 (29.7%) | 0.69 (29.9%) |
| set304 | 0.60 | 1.00 | 6.04E-02 | 4.20E-04 (2.3%) | 2.55 (31.1%) | 0.69 (29.7%) | 0.69 (29.9%) |
| set218 | 0.60 | 1.01 | 5.98E-02 | 2.19E-04 (1.2%) | 2.55 (31.1%) | 0.69 (29.8%) | 0.69 (29.9%) |
| set219 | 0.60 | 1.01 | 5.98E-02 | 2.19E-04 (1.2%) | 2.55 (31.2%) | 0.69 (29.8%) | 0.69 (30.0%) |
| set104 | 0.40 | 1.01 | 3.51E-03 | 1.88E-04 (1.0%) | 4.52 (37.5%) | 1.38 (37.6%) | 1.37 (37.5%) |
| set103 | 0.40 | 1.01 | 3.51E-03 | 1.88E-04 (1.0%) | 4.52 (37.5%) | 1.38 (37.6%) | 1.37 (37.5%) |
| set105 | 0.40 | 1.01 | 3.51E-03 | 1.88E-04 (1.0%) | 4.52 (37.5%) | 1.38 (37.6%) | 1.37 (37.5%) |
| set106 | 0.40 | 1.01 | 3.51E-03 | 1.88E-04 (1.0%) | 4.52 (37.5%) | 1.38 (37.6%) | 1.37 (37.5%) |
| set409 | 0.40 | 1.01 | 3.51E-03 | 1.88E-04 (1.0%) | 4.52 (37.5%) | 1.38 (37.6%) | 1.37 (37.5%) |
| set422 | 0.40 | 1.01 | 3.51E-03 | 1.88E-04 (1.0%) | 4.52 (37.5%) | 1.38 (37.6%) | 1.37 (37.5%) |
| set425 | 0.40 | 1.01 | 3.51E-03 | 1.88E-04 (1.0%) | 4.52 (37.5%) | 1.38 (37.6%) | 1.37 (37.5%) |











|        |      |      |          |                 |              |              |              |
|--------|------|------|----------|-----------------|--------------|--------------|--------------|
| set433 | 0.40 | 1.01 | 3.51E-03 | 1.88E-04 (1.0%) | 4.59 (38.2%) | 1.40 (38.2%) | 1.40 (38.1%) |
| set434 | 0.40 | 1.01 | 3.51E-03 | 1.88E-04 (1.0%) | 4.59 (38.2%) | 1.40 (38.2%) | 1.40 (38.1%) |
| set123 | 0.40 | 1.01 | 3.51E-03 | 1.88E-04 (1.0%) | 4.59 (38.2%) | 1.40 (38.2%) | 1.40 (38.1%) |
| set124 | 0.40 | 1.01 | 3.51E-03 | 1.88E-04 (1.0%) | 4.59 (38.2%) | 1.40 (38.2%) | 1.40 (38.1%) |
| set125 | 0.40 | 1.01 | 3.51E-03 | 1.88E-04 (1.0%) | 4.59 (38.2%) | 1.40 (38.2%) | 1.40 (38.1%) |
| set122 | 0.40 | 1.01 | 3.51E-03 | 1.88E-04 (1.0%) | 4.59 (38.2%) | 1.40 (38.2%) | 1.40 (38.1%) |
| set273 | 0.40 | 1.01 | 3.51E-03 | 1.88E-04 (1.0%) | 4.59 (38.2%) | 1.40 (38.2%) | 1.40 (38.1%) |
| set136 | 0.40 | 1.01 | 3.51E-03 | 1.88E-04 (1.0%) | 4.59 (38.2%) | 1.40 (38.2%) | 1.40 (38.1%) |
| set130 | 0.40 | 1.01 | 3.51E-03 | 1.88E-04 (1.0%) | 4.59 (38.2%) | 1.40 (38.2%) | 1.40 (38.1%) |
| set129 | 0.40 | 1.01 | 3.51E-03 | 1.88E-04 (1.0%) | 4.59 (38.2%) | 1.40 (38.2%) | 1.40 (38.1%) |
| set127 | 0.40 | 1.01 | 3.51E-03 | 1.88E-04 (1.0%) | 4.59 (38.2%) | 1.40 (38.2%) | 1.40 (38.1%) |
| set120 | 0.40 | 1.01 | 3.51E-03 | 1.88E-04 (1.0%) | 4.59 (38.2%) | 1.40 (38.2%) | 1.40 (38.1%) |
| set121 | 0.40 | 1.01 | 3.51E-03 | 1.88E-04 (1.0%) | 4.59 (38.2%) | 1.40 (38.2%) | 1.40 (38.1%) |
| set126 | 0.40 | 1.01 | 3.51E-03 | 1.88E-04 (1.0%) | 4.59 (38.2%) | 1.40 (38.2%) | 1.40 (38.1%) |
| set128 | 0.40 | 1.01 | 3.51E-03 | 1.88E-04 (1.0%) | 4.59 (38.2%) | 1.40 (38.2%) | 1.40 (38.1%) |
| set132 | 0.40 | 1.01 | 3.51E-03 | 1.88E-04 (1.0%) | 4.59 (38.2%) | 1.40 (38.2%) | 1.40 (38.1%) |
| set131 | 0.40 | 1.01 | 3.51E-03 | 1.88E-04 (1.0%) | 4.59 (38.2%) | 1.40 (38.2%) | 1.40 (38.1%) |

## 8 Unscaled and scaled frequencies of top 5 full sets

**w1** (scaling factor 0.998)

Table S8: Scaled and Unscaled Frequencies of w1 cluster

| Vibrational Modes | Unscaled Frequencies (cm <sup>-1</sup> ) | Scaled Frequencies (cm <sup>-1</sup> ) |
|-------------------|------------------------------------------|----------------------------------------|
| Mode 1            | 1639.629                                 | 1636.349742                            |
| Mode 2            | 3774.932                                 | 3767.382136                            |
| Mode 3            | 3902.493                                 | 3894.688014                            |

**w2** (scaling factor 0.997)

Table S9: Scaled and Unscaled Frequencies of w2 cluster

| Vibrational Modes | Unscaled Frequencies (cm <sup>-1</sup> ) | Scaled Frequencies (cm <sup>-1</sup> ) |
|-------------------|------------------------------------------|----------------------------------------|
| Mode 1            | 121.700                                  | 121.334900                             |
| Mode 2            | 136.530                                  | 136.120410                             |
| Mode 3            | 141.013                                  | 140.589961                             |
| Mode 4            | 169.969                                  | 169.459093                             |
| Mode 5            | 335.067                                  | 334.061799                             |
| Mode 6            | 603.654                                  | 601.843038                             |
| Mode 7            | 1641.623                                 | 1636.698131                            |
| Mode 8            | 1658.867                                 | 1653.890399                            |
| Mode 9            | 3709.639                                 | 3698.510083                            |
| Mode 10           | 3771.710                                 | 3760.394870                            |
| Mode 11           | 3875.069                                 | 3863.443793                            |



|         |          |             |
|---------|----------|-------------|
| Mode 4  | 119.996  | 118.676044  |
| Mode 5  | 143.608  | 142.028312  |
| Mode 6  | 159.606  | 157.850334  |
| Mode 7  | 176.548  | 174.605972  |
| Mode 8  | 180.503  | 178.517467  |
| Mode 9  | 184.981  | 182.946209  |
| Mode 10 | 191.532  | 189.425148  |
| Mode 11 | 211.727  | 209.398003  |
| Mode 12 | 227.387  | 224.885743  |
| Mode 13 | 243.570  | 240.890730  |
| Mode 14 | 296.166  | 292.908174  |
| Mode 15 | 328.598  | 324.983422  |
| Mode 16 | 366.738  | 362.703882  |
| Mode 17 | 414.846  | 410.282694  |
| Mode 18 | 444.089  | 439.204021  |
| Mode 19 | 489.673  | 484.286597  |
| Mode 20 | 565.927  | 559.701803  |
| Mode 21 | 623.815  | 616.953035  |
| Mode 22 | 637.707  | 630.692223  |
| Mode 23 | 760.341  | 751.977249  |
| Mode 24 | 877.956  | 868.298484  |
| Mode 25 | 1648.057 | 1629.928373 |
| Mode 26 | 1655.761 | 1637.547629 |
| Mode 27 | 1661.924 | 1643.642836 |
| Mode 28 | 1673.388 | 1654.980732 |
| Mode 29 | 1687.270 | 1668.710030 |
| Mode 30 | 3544.495 | 3505.505555 |
| Mode 31 | 3641.238 | 3601.184382 |
| Mode 32 | 3663.643 | 3623.342927 |
| Mode 33 | 3674.362 | 3633.944018 |
| Mode 34 | 3724.518 | 3683.548302 |
| Mode 35 | 3771.051 | 3729.569439 |
| Mode 36 | 3859.782 | 3817.324398 |
| Mode 37 | 3862.676 | 3820.186564 |
| Mode 38 | 3867.626 | 3825.082114 |
| Mode 39 | 3868.487 | 3825.933643 |

**w6-14\_60** (scaling factor 0.986)

Table S12: Scaled and Unscaled Frequencies of w6-14\_60 cluster

| <b>Vibrational Modes</b> | <b>Unscaled Frequencies (cm<sup>-1</sup>)</b> | <b>Scaled Frequencies (cm<sup>-1</sup>)</b> |
|--------------------------|-----------------------------------------------|---------------------------------------------|
| Mode 1                   | 20.078                                        | 19.796908                                   |
| Mode 2                   | 24.667                                        | 24.321662                                   |
| Mode 3                   | 36.181                                        | 35.674466                                   |
| Mode 4                   | 49.848                                        | 49.150128                                   |

|         |          |             |
|---------|----------|-------------|
| Mode 5  | 53.845   | 53.091170   |
| Mode 6  | 111.624  | 110.061264  |
| Mode 7  | 125.459  | 123.702574  |
| Mode 8  | 144.326  | 142.305436  |
| Mode 9  | 159.294  | 157.063884  |
| Mode 10 | 168.909  | 166.544274  |
| Mode 11 | 186.056  | 183.451216  |
| Mode 12 | 197.091  | 194.331726  |
| Mode 13 | 207.921  | 205.010106  |
| Mode 14 | 238.027  | 234.694622  |
| Mode 15 | 242.915  | 239.514190  |
| Mode 16 | 248.035  | 244.562510  |
| Mode 17 | 255.899  | 252.316414  |
| Mode 18 | 312.782  | 308.403052  |
| Mode 19 | 334.695  | 330.009270  |
| Mode 20 | 358.433  | 353.414938  |
| Mode 21 | 374.401  | 369.159386  |
| Mode 22 | 383.996  | 378.620056  |
| Mode 23 | 437.867  | 431.736862  |
| Mode 24 | 489.011  | 482.164846  |
| Mode 25 | 563.713  | 555.821018  |
| Mode 26 | 663.317  | 654.030562  |
| Mode 27 | 669.676  | 660.300536  |
| Mode 28 | 708.313  | 698.396618  |
| Mode 29 | 747.876  | 737.405736  |
| Mode 30 | 835.120  | 823.428320  |
| Mode 31 | 1645.002 | 1621.971972 |
| Mode 32 | 1659.409 | 1636.177274 |
| Mode 33 | 1666.893 | 1643.556498 |
| Mode 34 | 1675.180 | 1651.727480 |
| Mode 35 | 1686.516 | 1662.904776 |
| Mode 36 | 1709.935 | 1685.995910 |
| Mode 37 | 3558.293 | 3508.476898 |
| Mode 38 | 3598.212 | 3547.837032 |
| Mode 39 | 3619.200 | 3568.531200 |
| Mode 40 | 3636.600 | 3585.687600 |
| Mode 41 | 3691.123 | 3639.447278 |
| Mode 42 | 3716.518 | 3664.486748 |
| Mode 43 | 3797.834 | 3744.664324 |
| Mode 44 | 3859.044 | 3805.017384 |
| Mode 45 | 3859.836 | 3805.798296 |
| Mode 46 | 3860.423 | 3806.377078 |
| Mode 47 | 3863.439 | 3809.350854 |
| Mode 48 | 3872.714 | 3818.496004 |

---

w6-93\_80 (scaling factor 0.995)

Table S13: Scaled and Unscaled Frequencies of w6-93\_80 cluster

| <b>Vibrational Modes</b> | <b>Unscaled Frequencies (cm<sup>-1</sup>)</b> | <b>Scaled Frequencies (cm<sup>-1</sup>)</b> |
|--------------------------|-----------------------------------------------|---------------------------------------------|
| Mode 1                   | 4.263                                         | 4.241685                                    |
| Mode 2                   | 45.675                                        | 45.446625                                   |
| Mode 3                   | 60.879                                        | 60.574605                                   |
| Mode 4                   | 68.144                                        | 67.803280                                   |
| Mode 5                   | 100.711                                       | 100.207445                                  |
| Mode 6                   | 135.772                                       | 135.093140                                  |
| Mode 7                   | 157.896                                       | 157.106520                                  |
| Mode 8                   | 175.285                                       | 174.408575                                  |
| Mode 9                   | 186.947                                       | 186.012265                                  |
| Mode 10                  | 201.956                                       | 200.946220                                  |
| Mode 11                  | 204.747                                       | 203.723265                                  |
| Mode 12                  | 213.000                                       | 211.935000                                  |
| Mode 13                  | 227.617                                       | 226.478915                                  |
| Mode 14                  | 232.877                                       | 231.712615                                  |
| Mode 15                  | 249.741                                       | 248.492295                                  |
| Mode 16                  | 271.287                                       | 269.930565                                  |
| Mode 17                  | 313.252                                       | 311.685740                                  |
| Mode 18                  | 340.122                                       | 338.421390                                  |
| Mode 19                  | 364.744                                       | 362.920280                                  |
| Mode 20                  | 386.202                                       | 384.270990                                  |
| Mode 21                  | 414.079                                       | 412.008605                                  |
| Mode 22                  | 438.355                                       | 436.163225                                  |
| Mode 23                  | 491.754                                       | 489.295230                                  |
| Mode 24                  | 544.391                                       | 541.669045                                  |
| Mode 25                  | 599.225                                       | 596.228875                                  |
| Mode 26                  | 631.211                                       | 628.054945                                  |
| Mode 27                  | 676.609                                       | 673.225955                                  |
| Mode 28                  | 746.588                                       | 742.855060                                  |
| Mode 29                  | 779.878                                       | 775.978610                                  |
| Mode 30                  | 840.180                                       | 835.979100                                  |
| Mode 31                  | 1645.963                                      | 1637.733185                                 |
| Mode 32                  | 1657.982                                      | 1649.692090                                 |
| Mode 33                  | 1663.440                                      | 1655.122800                                 |
| Mode 34                  | 1688.917                                      | 1680.472415                                 |
| Mode 35                  | 1695.804                                      | 1687.324980                                 |
| Mode 36                  | 1702.312                                      | 1693.800440                                 |
| Mode 37                  | 3535.991                                      | 3518.311045                                 |
| Mode 38                  | 3599.085                                      | 3581.089575                                 |
| Mode 39                  | 3615.121                                      | 3597.045395                                 |
| Mode 40                  | 3666.272                                      | 3647.940640                                 |
| Mode 41                  | 3673.530                                      | 3655.162350                                 |
| Mode 42                  | 3719.499                                      | 3700.901505                                 |
| Mode 43                  | 3768.562                                      | 3749.719190                                 |



|         |          |             |
|---------|----------|-------------|
| Mode 44 | 3813.670 | 3794.601650 |
| Mode 45 | 3843.056 | 3823.840720 |
| Mode 46 | 3856.425 | 3837.142875 |
| Mode 47 | 3862.446 | 3843.133770 |
| Mode 48 | 3865.347 | 3846.020265 |

w7-40\_40 (scaling factor 0.983)

Table S14: Scaled and Unscaled Frequencies of w7-40\_40 cluster

| Vibrational Modes | Unscaled Frequencies (cm <sup>-1</sup> ) | Scaled Frequencies (cm <sup>-1</sup> ) |
|-------------------|------------------------------------------|----------------------------------------|
| Mode 1            | 15.753                                   | 15.485199                              |
| Mode 2            | 21.433                                   | 21.068639                              |
| Mode 3            | 32.481                                   | 31.928823                              |
| Mode 4            | 45.879                                   | 45.099057                              |
| Mode 5            | 50.167                                   | 49.314161                              |
| Mode 6            | 62.348                                   | 61.288084                              |
| Mode 7            | 91.622                                   | 90.064426                              |
| Mode 8            | 138.985                                  | 136.622255                             |
| Mode 9            | 141.704                                  | 139.295032                             |
| Mode 10           | 164.681                                  | 161.881423                             |
| Mode 11           | 184.125                                  | 180.994875                             |
| Mode 12           | 189.544                                  | 186.321752                             |
| Mode 13           | 190.703                                  | 187.461049                             |
| Mode 14           | 197.137                                  | 193.785671                             |
| Mode 15           | 207.717                                  | 204.185811                             |
| Mode 16           | 215.374                                  | 211.712642                             |
| Mode 17           | 222.413                                  | 218.631979                             |
| Mode 18           | 228.427                                  | 224.543741                             |
| Mode 19           | 243.180                                  | 239.045940                             |
| Mode 20           | 253.561                                  | 249.250463                             |
| Mode 21           | 293.872                                  | 288.876176                             |
| Mode 22           | 333.873                                  | 328.197159                             |
| Mode 23           | 347.700                                  | 341.789100                             |
| Mode 24           | 352.340                                  | 346.350220                             |
| Mode 25           | 360.883                                  | 354.747989                             |
| Mode 26           | 428.154                                  | 420.875382                             |
| Mode 27           | 465.511                                  | 457.597313                             |
| Mode 28           | 492.539                                  | 484.165837                             |
| Mode 29           | 569.682                                  | 559.997406                             |
| Mode 30           | 634.066                                  | 623.286878                             |
| Mode 31           | 658.358                                  | 647.165914                             |
| Mode 32           | 671.080                                  | 659.671640                             |
| Mode 33           | 689.546                                  | 677.823718                             |
| Mode 34           | 737.120                                  | 724.588960                             |
| Mode 35           | 804.847                                  | 791.164601                             |

|         |          |             |
|---------|----------|-------------|
| Mode 36 | 831.734  | 817.594522  |
| Mode 37 | 1656.267 | 1628.110461 |
| Mode 38 | 1660.265 | 1632.040495 |
| Mode 39 | 1665.016 | 1636.710728 |
| Mode 40 | 1669.257 | 1640.879631 |
| Mode 41 | 1677.658 | 1649.137814 |
| Mode 42 | 1689.538 | 1660.815854 |
| Mode 43 | 1700.962 | 1672.045646 |
| Mode 44 | 3572.126 | 3511.399858 |
| Mode 45 | 3589.682 | 3528.657406 |
| Mode 46 | 3620.953 | 3559.396799 |
| Mode 47 | 3631.239 | 3569.507937 |
| Mode 48 | 3643.440 | 3581.501520 |
| Mode 49 | 3653.884 | 3591.767972 |
| Mode 50 | 3714.469 | 3651.323027 |
| Mode 51 | 3744.436 | 3680.780588 |
| Mode 52 | 3802.101 | 3737.465283 |
| Mode 53 | 3858.080 | 3792.492640 |
| Mode 54 | 3859.662 | 3794.047746 |
| Mode 55 | 3860.965 | 3795.328595 |
| Mode 56 | 3863.942 | 3798.254986 |
| Mode 57 | 3865.300 | 3799.589900 |

w7-6\_40 (scaling factor 0.989)

Table S15: Scaled and Unscaled Frequencies of w7-6\_40 cluster

| Vibrational Modes | Unscaled Frequencies $\text{cm}^{-1}$ | Scaled Frequencies ( $\text{cm}^{-1}$ ) |
|-------------------|---------------------------------------|-----------------------------------------|
| Mode 1            | 14.797                                | 14.634233                               |
| Mode 2            | 23.672                                | 23.411608                               |
| Mode 3            | 30.801                                | 30.462189                               |
| Mode 4            | 34.115                                | 33.739735                               |
| Mode 5            | 43.322                                | 42.845458                               |
| Mode 6            | 66.340                                | 65.610260                               |
| Mode 7            | 91.787                                | 90.777343                               |
| Mode 8            | 103.528                               | 102.389192                              |
| Mode 9            | 108.872                               | 107.674408                              |
| Mode 10           | 131.880                               | 130.429320                              |
| Mode 11           | 153.947                               | 152.253583                              |
| Mode 12           | 166.365                               | 164.534985                              |
| Mode 13           | 176.222                               | 174.283558                              |
| Mode 14           | 181.236                               | 179.242404                              |
| Mode 15           | 190.594                               | 188.497466                              |
| Mode 16           | 193.856                               | 191.723584                              |
| Mode 17           | 209.860                               | 207.551540                              |
| Mode 18           | 217.991                               | 215.593099                              |

|         |          |             |
|---------|----------|-------------|
| Mode 19 | 228.452  | 225.939028  |
| Mode 20 | 250.127  | 247.375603  |
| Mode 21 | 316.040  | 312.563560  |
| Mode 22 | 339.122  | 335.391658  |
| Mode 23 | 344.605  | 340.814345  |
| Mode 24 | 358.925  | 354.976825  |
| Mode 25 | 392.028  | 387.715692  |
| Mode 26 | 414.697  | 410.135333  |
| Mode 27 | 428.945  | 424.226605  |
| Mode 28 | 497.393  | 491.921677  |
| Mode 29 | 566.270  | 560.041030  |
| Mode 30 | 598.565  | 591.980785  |
| Mode 31 | 642.930  | 635.857770  |
| Mode 32 | 669.527  | 662.162203  |
| Mode 33 | 705.005  | 697.249945  |
| Mode 34 | 726.241  | 718.252349  |
| Mode 35 | 773.002  | 764.498978  |
| Mode 36 | 928.453  | 918.240017  |
| Mode 37 | 1639.456 | 1621.421984 |
| Mode 38 | 1655.478 | 1637.267742 |
| Mode 39 | 1659.891 | 1641.632199 |
| Mode 40 | 1663.978 | 1645.674242 |
| Mode 41 | 1666.832 | 1648.496848 |
| Mode 42 | 1672.101 | 1653.707889 |
| Mode 43 | 1712.497 | 1693.659533 |
| Mode 44 | 3542.936 | 3503.963704 |
| Mode 45 | 3617.160 | 3577.371240 |
| Mode 46 | 3622.850 | 3582.998650 |
| Mode 47 | 3651.192 | 3611.028888 |
| Mode 48 | 3662.196 | 3621.911844 |
| Mode 49 | 3673.620 | 3633.210180 |
| Mode 50 | 3704.703 | 3663.951267 |
| Mode 51 | 3726.586 | 3685.593554 |
| Mode 52 | 3773.909 | 3732.396001 |
| Mode 53 | 3858.781 | 3816.334409 |
| Mode 54 | 3863.927 | 3821.423803 |
| Mode 55 | 3865.960 | 3823.434440 |
| Mode 56 | 3872.748 | 3830.147772 |
| Mode 57 | 3876.144 | 3833.506416 |

w7-72\_80 (scaling factor 0.986)

| Vibrational Modes | Unscaled Frequencies (cm <sup>-1</sup> ) | Scaled Frequencies (cm <sup>-1</sup> ) |
|-------------------|------------------------------------------|----------------------------------------|
| Mode 1            | 1.404                                    | 1.384344                               |
| Mode 2            | 33.874                                   | 33.399764                              |

|         |          |             |
|---------|----------|-------------|
| Mode 3  | 35.883   | 35.380638   |
| Mode 4  | 46.851   | 46.195086   |
| Mode 5  | 56.668   | 55.874648   |
| Mode 6  | 71.496   | 70.495056   |
| Mode 7  | 116.672  | 115.038592  |
| Mode 8  | 135.338  | 133.443268  |
| Mode 9  | 167.026  | 164.687636  |
| Mode 10 | 171.852  | 169.446072  |
| Mode 11 | 175.025  | 172.574650  |
| Mode 12 | 180.528  | 178.000608  |
| Mode 13 | 186.673  | 184.059578  |
| Mode 14 | 194.426  | 191.704036  |
| Mode 15 | 200.455  | 197.648630  |
| Mode 16 | 208.023  | 205.110678  |
| Mode 17 | 216.748  | 213.713528  |
| Mode 18 | 234.746  | 231.459556  |
| Mode 19 | 239.100  | 235.752600  |
| Mode 20 | 252.652  | 249.114872  |
| Mode 21 | 318.687  | 314.225382  |
| Mode 22 | 338.837  | 334.093282  |
| Mode 23 | 359.258  | 354.228388  |
| Mode 24 | 384.472  | 379.089392  |
| Mode 25 | 400.370  | 394.764820  |
| Mode 26 | 411.557  | 405.795202  |
| Mode 27 | 456.848  | 450.452128  |
| Mode 28 | 541.381  | 533.801666  |
| Mode 29 | 570.425  | 562.439050  |
| Mode 30 | 593.929  | 585.613994  |
| Mode 31 | 605.878  | 597.395708  |
| Mode 32 | 663.941  | 654.645826  |
| Mode 33 | 693.841  | 684.127226  |
| Mode 34 | 731.515  | 721.273790  |
| Mode 35 | 787.896  | 776.865456  |
| Mode 36 | 804.732  | 793.465752  |
| Mode 37 | 1656.156 | 1632.969816 |
| Mode 38 | 1660.315 | 1637.070590 |
| Mode 39 | 1664.628 | 1641.323208 |
| Mode 40 | 1668.447 | 1645.088742 |
| Mode 41 | 1676.894 | 1653.417484 |
| Mode 42 | 1693.451 | 1669.742686 |
| Mode 43 | 1710.913 | 1686.960218 |
| Mode 44 | 3580.430 | 3530.303980 |
| Mode 45 | 3592.651 | 3542.353886 |
| Mode 46 | 3622.877 | 3572.156722 |
| Mode 47 | 3648.219 | 3597.143934 |
| Mode 48 | 3655.176 | 3604.003536 |

|         |          |             |
|---------|----------|-------------|
| Mode 49 | 3671.907 | 3620.500302 |
| Mode 50 | 3681.703 | 3630.159158 |
| Mode 51 | 3726.686 | 3674.512396 |
| Mode 52 | 3797.350 | 3744.187100 |
| Mode 53 | 3853.663 | 3799.711718 |
| Mode 54 | 3858.014 | 3804.001804 |
| Mode 55 | 3859.895 | 3805.856470 |
| Mode 56 | 3864.775 | 3810.668150 |
| Mode 57 | 3866.107 | 3811.981502 |

w7-9\_25 (scaling factor 0.989)

Table S17: Scaled and Unscaled Frequencies of w7-9\_25 cluster

| Vibrational Modes | Unscaled Frequencies (cm <sup>-1</sup> ) | Scaled Frequencies (cm <sup>-1</sup> ) |
|-------------------|------------------------------------------|----------------------------------------|
| Mode 1            | 2.267                                    | 2.242063                               |
| Mode 2            | 23.135                                   | 22.880515                              |
| Mode 3            | 28.262                                   | 27.951118                              |
| Mode 4            | 36.043                                   | 35.646527                              |
| Mode 5            | 40.151                                   | 39.709339                              |
| Mode 6            | 44.249                                   | 43.762261                              |
| Mode 7            | 51.195                                   | 50.631855                              |
| Mode 8            | 64.788                                   | 64.075332                              |
| Mode 9            | 123.835                                  | 122.472815                             |
| Mode 10           | 143.936                                  | 142.352704                             |
| Mode 11           | 166.150                                  | 164.322350                             |
| Mode 12           | 173.818                                  | 171.906002                             |
| Mode 13           | 176.363                                  | 174.423007                             |
| Mode 14           | 185.750                                  | 183.706750                             |
| Mode 15           | 195.133                                  | 192.986537                             |
| Mode 16           | 199.707                                  | 197.510223                             |
| Mode 17           | 213.807                                  | 211.455123                             |
| Mode 18           | 217.911                                  | 215.513979                             |
| Mode 19           | 225.727                                  | 223.244003                             |
| Mode 20           | 231.664                                  | 229.115696                             |
| Mode 21           | 247.542                                  | 244.819038                             |
| Mode 22           | 254.346                                  | 251.548194                             |
| Mode 23           | 327.279                                  | 323.678931                             |
| Mode 24           | 355.745                                  | 351.831805                             |
| Mode 25           | 365.370                                  | 361.350930                             |
| Mode 26           | 396.270                                  | 391.911030                             |
| Mode 27           | 498.270                                  | 492.789030                             |
| Mode 28           | 518.590                                  | 512.885510                             |
| Mode 29           | 543.245                                  | 537.269305                             |
| Mode 30           | 619.758                                  | 612.940662                             |
| Mode 31           | 629.269                                  | 622.347041                             |

|         |          |             |
|---------|----------|-------------|
| Mode 32 | 677.637  | 670.182993  |
| Mode 33 | 721.902  | 713.961078  |
| Mode 34 | 750.891  | 742.631199  |
| Mode 35 | 838.117  | 828.897713  |
| Mode 36 | 853.539  | 844.150071  |
| Mode 37 | 1639.689 | 1621.652421 |
| Mode 38 | 1655.348 | 1637.139172 |
| Mode 39 | 1659.555 | 1641.299895 |
| Mode 40 | 1666.734 | 1648.399926 |
| Mode 41 | 1680.222 | 1661.739558 |
| Mode 42 | 1690.371 | 1671.776919 |
| Mode 43 | 1702.273 | 1683.547997 |
| Mode 44 | 3534.124 | 3495.248636 |
| Mode 45 | 3601.223 | 3561.609547 |
| Mode 46 | 3615.584 | 3575.812576 |
| Mode 47 | 3640.588 | 3600.541532 |
| Mode 48 | 3653.944 | 3613.750616 |
| Mode 49 | 3668.795 | 3628.438255 |
| Mode 50 | 3735.557 | 3694.465873 |
| Mode 51 | 3749.914 | 3708.664946 |
| Mode 52 | 3776.256 | 3734.717184 |
| Mode 53 | 3857.280 | 3814.849920 |
| Mode 54 | 3858.757 | 3816.310673 |
| Mode 55 | 3862.207 | 3819.722723 |
| Mode 56 | 3864.039 | 3821.534571 |
| Mode 57 | 3898.778 | 3855.891442 |

w8-23\_25 (scaling factor 0.993)

Table S18: Scaled and Unscaled Frequencies of w8-23\_25 cluster

| Vibrational Modes | Unscaled Frequencies (cm <sup>-1</sup> ) | Scaled Frequencies (cm <sup>-1</sup> ) |
|-------------------|------------------------------------------|----------------------------------------|
| Mode 1            | 0.257                                    | 0.255201                               |
| Mode 2            | 2.200                                    | 2.184600                               |
| Mode 3            | 15.947                                   | 15.835371                              |
| Mode 4            | 29.911                                   | 29.701623                              |
| Mode 5            | 47.501                                   | 47.168493                              |
| Mode 6            | 51.243                                   | 50.884299                              |
| Mode 7            | 59.310                                   | 58.894830                              |
| Mode 8            | 76.129                                   | 75.596097                              |
| Mode 9            | 93.248                                   | 92.595264                              |
| Mode 10           | 117.434                                  | 116.611962                             |
| Mode 11           | 134.990                                  | 134.045070                             |
| Mode 12           | 143.097                                  | 142.095321                             |
| Mode 13           | 178.900                                  | 177.647700                             |
| Mode 14           | 182.624                                  | 181.345632                             |

|         |          |             |
|---------|----------|-------------|
| Mode 15 | 188.915  | 187.592595  |
| Mode 16 | 193.027  | 191.675811  |
| Mode 17 | 193.855  | 192.498015  |
| Mode 18 | 200.980  | 199.573140  |
| Mode 19 | 216.014  | 214.501902  |
| Mode 20 | 217.088  | 215.568384  |
| Mode 21 | 244.068  | 242.359524  |
| Mode 22 | 250.733  | 248.977869  |
| Mode 23 | 258.215  | 256.407495  |
| Mode 24 | 292.548  | 290.500164  |
| Mode 25 | 334.099  | 331.760307  |
| Mode 26 | 354.928  | 352.443504  |
| Mode 27 | 368.814  | 366.232302  |
| Mode 28 | 389.549  | 386.822157  |
| Mode 29 | 408.989  | 406.126077  |
| Mode 30 | 423.426  | 420.462018  |
| Mode 31 | 449.620  | 446.472660  |
| Mode 32 | 480.225  | 476.863425  |
| Mode 33 | 520.430  | 516.786990  |
| Mode 34 | 553.215  | 549.342495  |
| Mode 35 | 582.027  | 577.952811  |
| Mode 36 | 613.209  | 608.916537  |
| Mode 37 | 644.237  | 639.727341  |
| Mode 38 | 699.597  | 694.699821  |
| Mode 39 | 716.734  | 711.716862  |
| Mode 40 | 784.285  | 778.795005  |
| Mode 41 | 848.634  | 842.693562  |
| Mode 42 | 876.440  | 870.304920  |
| Mode 43 | 1641.158 | 1629.669894 |
| Mode 44 | 1648.581 | 1637.040933 |
| Mode 45 | 1658.859 | 1647.246987 |
| Mode 46 | 1661.809 | 1650.176337 |
| Mode 47 | 1667.157 | 1655.486901 |
| Mode 48 | 1678.184 | 1666.436712 |
| Mode 49 | 1689.420 | 1677.594060 |
| Mode 50 | 1694.585 | 1682.722905 |
| Mode 51 | 3565.399 | 3540.441207 |
| Mode 52 | 3574.088 | 3549.069384 |
| Mode 53 | 3615.062 | 3589.756566 |
| Mode 54 | 3629.595 | 3604.187835 |
| Mode 55 | 3651.435 | 3625.874955 |
| Mode 56 | 3666.012 | 3640.349916 |
| Mode 57 | 3701.081 | 3675.173433 |
| Mode 58 | 3709.150 | 3683.185950 |
| Mode 59 | 3729.842 | 3703.733106 |

|         |          |             |
|---------|----------|-------------|
| Mode 60 | 3795.671 | 3769.101303 |
| Mode 61 | 3812.037 | 3785.352741 |
| Mode 62 | 3854.886 | 3827.901798 |
| Mode 63 | 3858.210 | 3831.202530 |
| Mode 64 | 3863.547 | 3836.502171 |
| Mode 65 | 3870.002 | 3842.911986 |
| Mode 66 | 3880.171 | 3853.009803 |

w9-66\_25 (scaling factor 0.987)

Table S19: Scaled and Unscaled Frequencies of w9-66\_25 cluster

| Vibrational Modes | Unscaled Frequencies (cm <sup>-1</sup> ) | Scaled Frequencies (cm <sup>-1</sup> ) |
|-------------------|------------------------------------------|----------------------------------------|
| Mode 1            | 0.270                                    | 0.266490                               |
| Mode 2            | 26.732                                   | 26.384484                              |
| Mode 3            | 29.874                                   | 29.485638                              |
| Mode 4            | 36.300                                   | 35.828100                              |
| Mode 5            | 45.687                                   | 45.093069                              |
| Mode 6            | 50.302                                   | 49.648074                              |
| Mode 7            | 58.465                                   | 57.704955                              |
| Mode 8            | 65.277                                   | 64.428399                              |
| Mode 9            | 74.908                                   | 73.934196                              |
| Mode 10           | 130.617                                  | 128.918979                             |
| Mode 11           | 137.548                                  | 135.759876                             |
| Mode 12           | 154.214                                  | 152.209218                             |
| Mode 13           | 169.121                                  | 166.922427                             |
| Mode 14           | 171.937                                  | 169.701819                             |
| Mode 15           | 180.819                                  | 178.468353                             |
| Mode 16           | 193.364                                  | 190.850268                             |
| Mode 17           | 201.740                                  | 199.117380                             |
| Mode 18           | 203.785                                  | 201.135795                             |
| Mode 19           | 216.497                                  | 213.682539                             |
| Mode 20           | 218.205                                  | 215.368335                             |
| Mode 21           | 222.801                                  | 219.904587                             |
| Mode 22           | 227.186                                  | 224.232582                             |
| Mode 23           | 228.048                                  | 225.083376                             |
| Mode 24           | 236.487                                  | 233.412669                             |
| Mode 25           | 241.707                                  | 238.564809                             |
| Mode 26           | 264.050                                  | 260.617350                             |
| Mode 27           | 292.002                                  | 288.205974                             |
| Mode 28           | 339.721                                  | 335.304627                             |
| Mode 29           | 345.583                                  | 341.090421                             |
| Mode 30           | 364.021                                  | 359.288727                             |
| Mode 31           | 367.235                                  | 362.460945                             |
| Mode 32           | 375.915                                  | 371.028105                             |
| Mode 33           | 419.193                                  | 413.743491                             |



|         |          |             |
|---------|----------|-------------|
| Mode 34 | 450.474  | 444.617838  |
| Mode 35 | 478.442  | 472.222254  |
| Mode 36 | 524.372  | 517.555164  |
| Mode 37 | 551.464  | 544.294968  |
| Mode 38 | 590.911  | 583.229157  |
| Mode 39 | 614.727  | 606.735549  |
| Mode 40 | 649.589  | 641.144343  |
| Mode 41 | 666.722  | 658.054614  |
| Mode 42 | 670.637  | 661.918719  |
| Mode 43 | 700.318  | 691.213866  |
| Mode 44 | 761.091  | 751.196817  |
| Mode 45 | 775.387  | 765.306969  |
| Mode 46 | 809.799  | 799.271613  |
| Mode 47 | 849.899  | 838.850313  |
| Mode 48 | 938.160  | 925.963920  |
| Mode 49 | 1651.318 | 1629.850866 |
| Mode 50 | 1653.994 | 1632.492078 |
| Mode 51 | 1657.030 | 1635.488610 |
| Mode 52 | 1658.605 | 1637.043135 |
| Mode 53 | 1672.493 | 1650.750591 |
| Mode 54 | 1673.738 | 1651.979406 |
| Mode 55 | 1683.922 | 1662.031014 |
| Mode 56 | 1701.884 | 1679.759508 |
| Mode 57 | 1709.584 | 1687.359408 |
| Mode 58 | 3534.789 | 3488.836743 |
| Mode 59 | 3559.185 | 3512.915595 |
| Mode 60 | 3585.908 | 3539.291196 |
| Mode 61 | 3605.414 | 3558.543618 |
| Mode 62 | 3613.646 | 3566.668602 |
| Mode 63 | 3638.994 | 3591.687078 |
| Mode 64 | 3651.571 | 3604.100577 |
| Mode 65 | 3665.410 | 3617.759670 |
| Mode 66 | 3672.885 | 3625.137495 |
| Mode 67 | 3687.569 | 3639.630603 |
| Mode 68 | 3727.920 | 3679.457040 |
| Mode 69 | 3770.365 | 3721.350255 |
| Mode 70 | 3841.944 | 3791.998728 |
| Mode 71 | 3853.090 | 3802.999830 |
| Mode 72 | 3860.871 | 3810.679677 |
| Mode 73 | 3861.109 | 3810.914583 |
| Mode 74 | 3862.376 | 3812.165112 |
| Mode 75 | 3863.788 | 3813.558756 |

---

**w10-10\_80** (scaling factor 0.987)

Table S20: Scaled and Unscaled Frequencies of w10-10\_80 cluster

| <b>Vibrational Modes</b> | <b>Unscaled Frequencies (cm<sup>-1</sup>)</b> | <b>Scaled Frequencies (cm<sup>-1</sup>)</b> |
|--------------------------|-----------------------------------------------|---------------------------------------------|
| Mode 1                   | 1.390                                         | 1.371930                                    |
| Mode 2                   | 17.375                                        | 17.149125                                   |
| Mode 3                   | 20.533                                        | 20.266071                                   |
| Mode 4                   | 31.579                                        | 31.168473                                   |
| Mode 5                   | 35.589                                        | 35.126343                                   |
| Mode 6                   | 42.295                                        | 41.745165                                   |
| Mode 7                   | 45.110                                        | 44.523570                                   |
| Mode 8                   | 58.686                                        | 57.923082                                   |
| Mode 9                   | 60.887                                        | 60.095469                                   |
| Mode 10                  | 71.169                                        | 70.243803                                   |
| Mode 11                  | 80.187                                        | 79.144569                                   |
| Mode 12                  | 116.465                                       | 114.950955                                  |
| Mode 13                  | 128.484                                       | 126.813708                                  |
| Mode 14                  | 131.669                                       | 129.957303                                  |
| Mode 15                  | 139.509                                       | 137.695383                                  |
| Mode 16                  | 145.216                                       | 143.328192                                  |
| Mode 17                  | 156.626                                       | 154.589862                                  |
| Mode 18                  | 170.601                                       | 168.383187                                  |
| Mode 19                  | 172.771                                       | 170.524977                                  |
| Mode 20                  | 176.798                                       | 174.499626                                  |
| Mode 21                  | 180.716                                       | 178.366692                                  |
| Mode 22                  | 188.659                                       | 186.206433                                  |
| Mode 23                  | 192.632                                       | 190.127784                                  |
| Mode 24                  | 199.985                                       | 197.385195                                  |
| Mode 25                  | 218.712                                       | 215.868744                                  |
| Mode 26                  | 227.177                                       | 224.223699                                  |
| Mode 27                  | 237.389                                       | 234.302943                                  |
| Mode 28                  | 251.157                                       | 247.891959                                  |
| Mode 29                  | 257.921                                       | 254.568027                                  |
| Mode 30                  | 282.800                                       | 279.123600                                  |
| Mode 31                  | 327.145                                       | 322.892115                                  |
| Mode 32                  | 328.880                                       | 324.604560                                  |
| Mode 33                  | 352.855                                       | 348.267885                                  |
| Mode 34                  | 362.159                                       | 357.450933                                  |
| Mode 35                  | 375.139                                       | 370.262193                                  |
| Mode 36                  | 407.782                                       | 402.480834                                  |
| Mode 37                  | 424.924                                       | 419.399988                                  |
| Mode 38                  | 445.596                                       | 439.803252                                  |
| Mode 39                  | 461.090                                       | 455.095830                                  |
| Mode 40                  | 519.618                                       | 512.862966                                  |
| Mode 41                  | 541.678                                       | 534.636186                                  |
| Mode 42                  | 560.791                                       | 553.500717                                  |
| Mode 43                  | 591.309                                       | 583.621983                                  |

|         |          |             |
|---------|----------|-------------|
| Mode 44 | 598.317  | 590.538879  |
| Mode 45 | 615.809  | 607.803483  |
| Mode 46 | 623.825  | 615.715275  |
| Mode 47 | 641.563  | 633.222681  |
| Mode 48 | 692.559  | 683.555733  |
| Mode 49 | 699.166  | 690.076842  |
| Mode 50 | 723.452  | 714.047124  |
| Mode 51 | 733.389  | 723.854943  |
| Mode 52 | 762.894  | 752.976378  |
| Mode 53 | 819.101  | 808.452687  |
| Mode 54 | 888.380  | 876.831060  |
| Mode 55 | 1651.373 | 1629.905151 |
| Mode 56 | 1657.148 | 1635.605076 |
| Mode 57 | 1658.974 | 1637.407338 |
| Mode 58 | 1660.410 | 1638.824670 |
| Mode 59 | 1663.558 | 1641.931746 |
| Mode 60 | 1677.170 | 1655.366790 |
| Mode 61 | 1690.970 | 1668.987390 |
| Mode 62 | 1706.237 | 1684.055919 |
| Mode 63 | 1711.010 | 1688.766870 |
| Mode 64 | 1719.531 | 1697.177097 |
| Mode 65 | 3554.025 | 3507.822675 |
| Mode 66 | 3600.410 | 3553.604670 |
| Mode 67 | 3610.169 | 3563.236803 |
| Mode 68 | 3616.905 | 3569.885235 |
| Mode 69 | 3638.977 | 3591.670299 |
| Mode 70 | 3655.580 | 3608.057460 |
| Mode 71 | 3656.753 | 3609.215211 |
| Mode 72 | 3665.814 | 3618.158418 |
| Mode 73 | 3681.308 | 3633.450996 |
| Mode 74 | 3687.204 | 3639.270348 |
| Mode 75 | 3705.195 | 3657.027465 |
| Mode 76 | 3722.881 | 3674.483547 |
| Mode 77 | 3728.790 | 3680.315730 |
| Mode 78 | 3780.397 | 3731.251839 |
| Mode 79 | 3859.060 | 3808.892220 |
| Mode 80 | 3860.219 | 3810.036153 |
| Mode 81 | 3864.677 | 3814.436199 |
| Mode 82 | 3866.580 | 3816.314460 |
| Mode 83 | 3870.667 | 3820.348329 |
| Mode 84 | 3878.407 | 3827.987709 |

---

## 9 List of all 459 clustersets tested

Table S21: List of  $W_n$  clusters making up all the 459 clustersets tested in this work.

| Set   | Clusters |      |          |          |          |          |          |          |           |
|-------|----------|------|----------|----------|----------|----------|----------|----------|-----------|
| set1  | w1       | 2-w2 | w4-41_80 | w5-59_80 | w6-28_60 | w7-97_25 | w8-23_25 | w9-66_25 | w10-10_80 |
| set2  | w1       | 2-w2 | w4-41_80 | w5-59_80 | w6-28_60 | w7-76_40 | w8-23_25 | w9-66_25 | w10-10_80 |
| set3  | w1       | 2-w2 | w4-41_80 | w5-59_80 | w6-28_60 | w7-95_40 | w8-23_25 | w9-66_25 | w10-10_80 |
| set4  | w1       | 2-w2 | w4-41_80 | w5-59_80 | w6-28_60 | w7-33_40 | w8-23_25 | w9-66_25 | w10-10_80 |
| set5  | w1       | 2-w2 | w4-41_80 | w5-59_80 | w6-28_60 | w7-72_80 | w8-23_25 | w9-66_25 | w10-10_80 |
| set6  | w1       | 2-w2 | w4-41_80 | w5-59_80 | w6-28_60 | w7-6_40  | w8-23_25 | w9-66_25 | w10-10_80 |
| set7  | w1       | 2-w2 | w4-41_80 | w5-59_80 | w6-28_60 | w7-9_25  | w8-23_25 | w9-66_25 | w10-10_80 |
| set8  | w1       | 2-w2 | w4-41_80 | w5-59_80 | w6-28_60 | w7-92_60 | w8-23_25 | w9-66_25 | w10-10_80 |
| set9  | w1       | 2-w2 | w4-41_80 | w5-59_80 | w6-28_60 | w7-40_40 | w8-23_25 | w9-66_25 | w10-10_80 |
| set10 | w1       | 2-w2 | w4-41_80 | w5-59_80 | w6-28_60 | w7-17_60 | w8-23_25 | w9-66_25 | w10-10_80 |
| set11 | w1       | 2-w2 | w4-41_80 | w5-59_80 | w6-28_60 | w7-47_80 | w8-23_25 | w9-66_25 | w10-10_80 |
| set12 | w1       | 2-w2 | w4-41_80 | w5-59_80 | w6-28_60 | w7-67_25 | w8-23_25 | w9-66_25 | w10-10_80 |
| set13 | w1       | 2-w2 | w4-41_80 | w5-59_80 | w6-28_60 | w7-86_60 | w8-23_25 | w9-66_25 | w10-10_80 |
| set14 | w1       | 2-w2 | w4-41_80 | w5-59_80 | w6-28_60 | w7-1_80  | w8-23_25 | w9-66_25 | w10-10_80 |
| set15 | w1       | 2-w2 | w4-41_80 | w5-59_80 | w6-28_60 | w7-35_60 | w8-23_25 | w9-66_25 | w10-10_80 |
| set16 | w1       | 2-w2 | w4-41_80 | w5-59_80 | w6-28_60 | w7-40_80 | w8-23_25 | w9-66_25 | w10-10_80 |
| set17 | w1       | 2-w2 | w4-41_80 | w5-59_80 | w6-28_60 | w7-56_40 | w8-23_25 | w9-66_25 | w10-10_80 |
| set18 | w1       | 2-w2 | w4-41_80 | w5-59_80 | w6-59_25 | w7-97_25 | w8-23_25 | w9-66_25 | w10-10_80 |
| set19 | w1       | 2-w2 | w4-41_80 | w5-59_80 | w6-59_25 | w7-76_40 | w8-23_25 | w9-66_25 | w10-10_80 |
| set20 | w1       | 2-w2 | w4-41_80 | w5-59_80 | w6-59_25 | w7-95_40 | w8-23_25 | w9-66_25 | w10-10_80 |
| set21 | w1       | 2-w2 | w4-41_80 | w5-59_80 | w6-59_25 | w7-33_40 | w8-23_25 | w9-66_25 | w10-10_80 |
| set22 | w1       | 2-w2 | w4-41_80 | w5-59_80 | w6-59_25 | w7-72_80 | w8-23_25 | w9-66_25 | w10-10_80 |
| set23 | w1       | 2-w2 | w4-41_80 | w5-59_80 | w6-59_25 | w7-6_40  | w8-23_25 | w9-66_25 | w10-10_80 |
| set24 | w1       | 2-w2 | w4-41_80 | w5-59_80 | w6-59_25 | w7-9_25  | w8-23_25 | w9-66_25 | w10-10_80 |
| set25 | w1       | 2-w2 | w4-41_80 | w5-59_80 | w6-59_25 | w7-92_60 | w8-23_25 | w9-66_25 | w10-10_80 |
| set26 | w1       | 2-w2 | w4-41_80 | w5-59_80 | w6-59_25 | w7-40_40 | w8-23_25 | w9-66_25 | w10-10_80 |
| set27 | w1       | 2-w2 | w4-41_80 | w5-59_80 | w6-59_25 | w7-17_60 | w8-23_25 | w9-66_25 | w10-10_80 |
| set28 | w1       | 2-w2 | w4-41_80 | w5-59_80 | w6-59_25 | w7-47_80 | w8-23_25 | w9-66_25 | w10-10_80 |
| set29 | w1       | 2-w2 | w4-41_80 | w5-59_80 | w6-59_25 | w7-67_25 | w8-23_25 | w9-66_25 | w10-10_80 |
| set30 | w1       | 2-w2 | w4-41_80 | w5-59_80 | w6-59_25 | w7-86_60 | w8-23_25 | w9-66_25 | w10-10_80 |
| set31 | w1       | 2-w2 | w4-41_80 | w5-59_80 | w6-59_25 | w7-1_80  | w8-23_25 | w9-66_25 | w10-10_80 |
| set32 | w1       | 2-w2 | w4-41_80 | w5-59_80 | w6-59_25 | w7-35_60 | w8-23_25 | w9-66_25 | w10-10_80 |
| set33 | w1       | 2-w2 | w4-41_80 | w5-59_80 | w6-59_25 | w7-40_80 | w8-23_25 | w9-66_25 | w10-10_80 |
| set34 | w1       | 2-w2 | w4-41_80 | w5-59_80 | w6-59_25 | w7-56_40 | w8-23_25 | w9-66_25 | w10-10_80 |
| set35 | w1       | 2-w2 | w4-41_80 | w5-59_80 | w6-14_60 | w7-97_25 | w8-23_25 | w9-66_25 | w10-10_80 |
| set36 | w1       | 2-w2 | w4-41_80 | w5-59_80 | w6-14_60 | w7-76_40 | w8-23_25 | w9-66_25 | w10-10_80 |
| set37 | w1       | 2-w2 | w4-41_80 | w5-59_80 | w6-14_60 | w7-95_40 | w8-23_25 | w9-66_25 | w10-10_80 |
| set38 | w1       | 2-w2 | w4-41_80 | w5-59_80 | w6-14_60 | w7-33_40 | w8-23_25 | w9-66_25 | w10-10_80 |
| set39 | w1       | 2-w2 | w4-41_80 | w5-59_80 | w6-14_60 | w7-72_80 | w8-23_25 | w9-66_25 | w10-10_80 |
| set40 | w1       | 2-w2 | w4-41_80 | w5-59_80 | w6-14_60 | w7-6_40  | w8-23_25 | w9-66_25 | w10-10_80 |



|               |    |      |          |          |          |          |          |          |           |
|---------------|----|------|----------|----------|----------|----------|----------|----------|-----------|
| <b>set87</b>  | w1 | 2-w2 | w4-41_80 | w5-59_80 | w6-65_40 | w7-76_40 | w8-23_25 | w9-66_25 | w10-10_80 |
| <b>set88</b>  | w1 | 2-w2 | w4-41_80 | w5-59_80 | w6-65_40 | w7-95_40 | w8-23_25 | w9-66_25 | w10-10_80 |
| <b>set89</b>  | w1 | 2-w2 | w4-41_80 | w5-59_80 | w6-65_40 | w7-33_40 | w8-23_25 | w9-66_25 | w10-10_80 |
| <b>set90</b>  | w1 | 2-w2 | w4-41_80 | w5-59_80 | w6-65_40 | w7-72_80 | w8-23_25 | w9-66_25 | w10-10_80 |
| <b>set91</b>  | w1 | 2-w2 | w4-41_80 | w5-59_80 | w6-65_40 | w7-6_40  | w8-23_25 | w9-66_25 | w10-10_80 |
| <b>set92</b>  | w1 | 2-w2 | w4-41_80 | w5-59_80 | w6-65_40 | w7-9_25  | w8-23_25 | w9-66_25 | w10-10_80 |
| <b>set93</b>  | w1 | 2-w2 | w4-41_80 | w5-59_80 | w6-65_40 | w7-92_60 | w8-23_25 | w9-66_25 | w10-10_80 |
| <b>set94</b>  | w1 | 2-w2 | w4-41_80 | w5-59_80 | w6-65_40 | w7-40_40 | w8-23_25 | w9-66_25 | w10-10_80 |
| <b>set95</b>  | w1 | 2-w2 | w4-41_80 | w5-59_80 | w6-65_40 | w7-17_60 | w8-23_25 | w9-66_25 | w10-10_80 |
| <b>set96</b>  | w1 | 2-w2 | w4-41_80 | w5-59_80 | w6-65_40 | w7-47_80 | w8-23_25 | w9-66_25 | w10-10_80 |
| <b>set97</b>  | w1 | 2-w2 | w4-41_80 | w5-59_80 | w6-65_40 | w7-67_25 | w8-23_25 | w9-66_25 | w10-10_80 |
| <b>set98</b>  | w1 | 2-w2 | w4-41_80 | w5-59_80 | w6-65_40 | w7-86_60 | w8-23_25 | w9-66_25 | w10-10_80 |
| <b>set99</b>  | w1 | 2-w2 | w4-41_80 | w5-59_80 | w6-65_40 | w7-1_80  | w8-23_25 | w9-66_25 | w10-10_80 |
| <b>set100</b> | w1 | 2-w2 | w4-41_80 | w5-59_80 | w6-65_40 | w7-35_60 | w8-23_25 | w9-66_25 | w10-10_80 |
| <b>set101</b> | w1 | 2-w2 | w4-41_80 | w5-59_80 | w6-65_40 | w7-40_80 | w8-23_25 | w9-66_25 | w10-10_80 |
| <b>set102</b> | w1 | 2-w2 | w4-41_80 | w5-59_80 | w6-65_40 | w7-56_40 | w8-23_25 | w9-66_25 | w10-10_80 |
| <b>set103</b> | w1 | 2-w2 | w4-41_80 | w5-59_80 | w6-13_40 | w7-97_25 | w8-23_25 | w9-66_25 | w10-10_80 |
| <b>set104</b> | w1 | 2-w2 | w4-41_80 | w5-59_80 | w6-13_40 | w7-76_40 | w8-23_25 | w9-66_25 | w10-10_80 |
| <b>set105</b> | w1 | 2-w2 | w4-41_80 | w5-59_80 | w6-13_40 | w7-95_40 | w8-23_25 | w9-66_25 | w10-10_80 |
| <b>set106</b> | w1 | 2-w2 | w4-41_80 | w5-59_80 | w6-13_40 | w7-33_40 | w8-23_25 | w9-66_25 | w10-10_80 |
| <b>set107</b> | w1 | 2-w2 | w4-41_80 | w5-59_80 | w6-13_40 | w7-72_80 | w8-23_25 | w9-66_25 | w10-10_80 |
| <b>set108</b> | w1 | 2-w2 | w4-41_80 | w5-59_80 | w6-13_40 | w7-6_40  | w8-23_25 | w9-66_25 | w10-10_80 |
| <b>set109</b> | w1 | 2-w2 | w4-41_80 | w5-59_80 | w6-13_40 | w7-9_25  | w8-23_25 | w9-66_25 | w10-10_80 |
| <b>set110</b> | w1 | 2-w2 | w4-41_80 | w5-59_80 | w6-13_40 | w7-92_60 | w8-23_25 | w9-66_25 | w10-10_80 |
| <b>set111</b> | w1 | 2-w2 | w4-41_80 | w5-59_80 | w6-13_40 | w7-40_40 | w8-23_25 | w9-66_25 | w10-10_80 |
| <b>set112</b> | w1 | 2-w2 | w4-41_80 | w5-59_80 | w6-13_40 | w7-17_60 | w8-23_25 | w9-66_25 | w10-10_80 |
| <b>set113</b> | w1 | 2-w2 | w4-41_80 | w5-59_80 | w6-13_40 | w7-47_80 | w8-23_25 | w9-66_25 | w10-10_80 |
| <b>set114</b> | w1 | 2-w2 | w4-41_80 | w5-59_80 | w6-13_40 | w7-67_25 | w8-23_25 | w9-66_25 | w10-10_80 |
| <b>set115</b> | w1 | 2-w2 | w4-41_80 | w5-59_80 | w6-13_40 | w7-86_60 | w8-23_25 | w9-66_25 | w10-10_80 |
| <b>set116</b> | w1 | 2-w2 | w4-41_80 | w5-59_80 | w6-13_40 | w7-1_80  | w8-23_25 | w9-66_25 | w10-10_80 |
| <b>set117</b> | w1 | 2-w2 | w4-41_80 | w5-59_80 | w6-13_40 | w7-35_60 | w8-23_25 | w9-66_25 | w10-10_80 |
| <b>set118</b> | w1 | 2-w2 | w4-41_80 | w5-59_80 | w6-13_40 | w7-40_80 | w8-23_25 | w9-66_25 | w10-10_80 |
| <b>set119</b> | w1 | 2-w2 | w4-41_80 | w5-59_80 | w6-13_40 | w7-56_40 | w8-23_25 | w9-66_25 | w10-10_80 |
| <b>set120</b> | w1 | 2-w2 | w4-41_80 | w5-59_80 | w6-47_40 | w7-97_25 | w8-23_25 | w9-66_25 | w10-10_80 |
| <b>set121</b> | w1 | 2-w2 | w4-41_80 | w5-59_80 | w6-47_40 | w7-76_40 | w8-23_25 | w9-66_25 | w10-10_80 |
| <b>set122</b> | w1 | 2-w2 | w4-41_80 | w5-59_80 | w6-47_40 | w7-95_40 | w8-23_25 | w9-66_25 | w10-10_80 |
| <b>set123</b> | w1 | 2-w2 | w4-41_80 | w5-59_80 | w6-47_40 | w7-33_40 | w8-23_25 | w9-66_25 | w10-10_80 |
| <b>set124</b> | w1 | 2-w2 | w4-41_80 | w5-59_80 | w6-47_40 | w7-72_80 | w8-23_25 | w9-66_25 | w10-10_80 |
| <b>set125</b> | w1 | 2-w2 | w4-41_80 | w5-59_80 | w6-47_40 | w7-6_40  | w8-23_25 | w9-66_25 | w10-10_80 |
| <b>set126</b> | w1 | 2-w2 | w4-41_80 | w5-59_80 | w6-47_40 | w7-9_25  | w8-23_25 | w9-66_25 | w10-10_80 |
| <b>set127</b> | w1 | 2-w2 | w4-41_80 | w5-59_80 | w6-47_40 | w7-92_60 | w8-23_25 | w9-66_25 | w10-10_80 |
| <b>set128</b> | w1 | 2-w2 | w4-41_80 | w5-59_80 | w6-47_40 | w7-40_40 | w8-23_25 | w9-66_25 | w10-10_80 |
| <b>set129</b> | w1 | 2-w2 | w4-41_80 | w5-59_80 | w6-47_40 | w7-17_60 | w8-23_25 | w9-66_25 | w10-10_80 |
| <b>set130</b> | w1 | 2-w2 | w4-41_80 | w5-59_80 | w6-47_40 | w7-47_80 | w8-23_25 | w9-66_25 | w10-10_80 |
| <b>set131</b> | w1 | 2-w2 | w4-41_80 | w5-59_80 | w6-47_40 | w7-67_25 | w8-23_25 | w9-66_25 | w10-10_80 |









|               |    |      |          |          |          |          |          |          |           |
|---------------|----|------|----------|----------|----------|----------|----------|----------|-----------|
| <b>set267</b> | w1 | 2-w2 | w4-41_80 | w5-76_80 | w6-13_40 | w7-67_25 | w8-23_25 | w9-66_25 | w10-10_80 |
| <b>set268</b> | w1 | 2-w2 | w4-41_80 | w5-76_80 | w6-13_40 | w7-86_60 | w8-23_25 | w9-66_25 | w10-10_80 |
| <b>set269</b> | w1 | 2-w2 | w4-41_80 | w5-76_80 | w6-13_40 | w7-1_80  | w8-23_25 | w9-66_25 | w10-10_80 |
| <b>set270</b> | w1 | 2-w2 | w4-41_80 | w5-76_80 | w6-13_40 | w7-35_60 | w8-23_25 | w9-66_25 | w10-10_80 |
| <b>set271</b> | w1 | 2-w2 | w4-41_80 | w5-76_80 | w6-13_40 | w7-40_80 | w8-23_25 | w9-66_25 | w10-10_80 |
| <b>set272</b> | w1 | 2-w2 | w4-41_80 | w5-76_80 | w6-13_40 | w7-56_40 | w8-23_25 | w9-66_25 | w10-10_80 |
| <b>set273</b> | w1 | 2-w2 | w4-41_80 | w5-76_80 | w6-47_40 | w7-97_25 | w8-23_25 | w9-66_25 | w10-10_80 |
| <b>set274</b> | w1 | 2-w2 | w4-41_80 | w5-76_80 | w6-47_40 | w7-76_40 | w8-23_25 | w9-66_25 | w10-10_80 |
| <b>set275</b> | w1 | 2-w2 | w4-41_80 | w5-76_80 | w6-47_40 | w7-95_40 | w8-23_25 | w9-66_25 | w10-10_80 |
| <b>set276</b> | w1 | 2-w2 | w4-41_80 | w5-76_80 | w6-47_40 | w7-33_40 | w8-23_25 | w9-66_25 | w10-10_80 |
| <b>set277</b> | w1 | 2-w2 | w4-41_80 | w5-76_80 | w6-47_40 | w7-72_80 | w8-23_25 | w9-66_25 | w10-10_80 |
| <b>set278</b> | w1 | 2-w2 | w4-41_80 | w5-76_80 | w6-47_40 | w7-6_40  | w8-23_25 | w9-66_25 | w10-10_80 |
| <b>set279</b> | w1 | 2-w2 | w4-41_80 | w5-76_80 | w6-47_40 | w7-9_25  | w8-23_25 | w9-66_25 | w10-10_80 |
| <b>set280</b> | w1 | 2-w2 | w4-41_80 | w5-76_80 | w6-47_40 | w7-92_60 | w8-23_25 | w9-66_25 | w10-10_80 |
| <b>set281</b> | w1 | 2-w2 | w4-41_80 | w5-76_80 | w6-47_40 | w7-40_40 | w8-23_25 | w9-66_25 | w10-10_80 |
| <b>set282</b> | w1 | 2-w2 | w4-41_80 | w5-76_80 | w6-47_40 | w7-17_60 | w8-23_25 | w9-66_25 | w10-10_80 |
| <b>set283</b> | w1 | 2-w2 | w4-41_80 | w5-76_80 | w6-47_40 | w7-47_80 | w8-23_25 | w9-66_25 | w10-10_80 |
| <b>set284</b> | w1 | 2-w2 | w4-41_80 | w5-76_80 | w6-47_40 | w7-67_25 | w8-23_25 | w9-66_25 | w10-10_80 |
| <b>set285</b> | w1 | 2-w2 | w4-41_80 | w5-76_80 | w6-47_40 | w7-86_60 | w8-23_25 | w9-66_25 | w10-10_80 |
| <b>set286</b> | w1 | 2-w2 | w4-41_80 | w5-76_80 | w6-47_40 | w7-1_80  | w8-23_25 | w9-66_25 | w10-10_80 |
| <b>set287</b> | w1 | 2-w2 | w4-41_80 | w5-76_80 | w6-47_40 | w7-35_60 | w8-23_25 | w9-66_25 | w10-10_80 |
| <b>set288</b> | w1 | 2-w2 | w4-41_80 | w5-76_80 | w6-47_40 | w7-40_80 | w8-23_25 | w9-66_25 | w10-10_80 |
| <b>set289</b> | w1 | 2-w2 | w4-41_80 | w5-76_80 | w6-47_40 | w7-56_40 | w8-23_25 | w9-66_25 | w10-10_80 |
| <b>set290</b> | w1 | 2-w2 | w4-41_80 | w5-76_80 | w6-32_80 | w7-97_25 | w8-23_25 | w9-66_25 | w10-10_80 |
| <b>set291</b> | w1 | 2-w2 | w4-41_80 | w5-76_80 | w6-32_80 | w7-76_40 | w8-23_25 | w9-66_25 | w10-10_80 |
| <b>set292</b> | w1 | 2-w2 | w4-41_80 | w5-76_80 | w6-32_80 | w7-95_40 | w8-23_25 | w9-66_25 | w10-10_80 |
| <b>set293</b> | w1 | 2-w2 | w4-41_80 | w5-76_80 | w6-32_80 | w7-33_40 | w8-23_25 | w9-66_25 | w10-10_80 |
| <b>set294</b> | w1 | 2-w2 | w4-41_80 | w5-76_80 | w6-32_80 | w7-72_80 | w8-23_25 | w9-66_25 | w10-10_80 |
| <b>set295</b> | w1 | 2-w2 | w4-41_80 | w5-76_80 | w6-32_80 | w7-6_40  | w8-23_25 | w9-66_25 | w10-10_80 |
| <b>set296</b> | w1 | 2-w2 | w4-41_80 | w5-76_80 | w6-32_80 | w7-9_25  | w8-23_25 | w9-66_25 | w10-10_80 |
| <b>set297</b> | w1 | 2-w2 | w4-41_80 | w5-76_80 | w6-32_80 | w7-92_60 | w8-23_25 | w9-66_25 | w10-10_80 |
| <b>set298</b> | w1 | 2-w2 | w4-41_80 | w5-76_80 | w6-32_80 | w7-40_40 | w8-23_25 | w9-66_25 | w10-10_80 |
| <b>set299</b> | w1 | 2-w2 | w4-41_80 | w5-76_80 | w6-32_80 | w7-17_60 | w8-23_25 | w9-66_25 | w10-10_80 |
| <b>set300</b> | w1 | 2-w2 | w4-41_80 | w5-76_80 | w6-32_80 | w7-47_80 | w8-23_25 | w9-66_25 | w10-10_80 |
| <b>set301</b> | w1 | 2-w2 | w4-41_80 | w5-76_80 | w6-32_80 | w7-67_25 | w8-23_25 | w9-66_25 | w10-10_80 |
| <b>set302</b> | w1 | 2-w2 | w4-41_80 | w5-76_80 | w6-32_80 | w7-86_60 | w8-23_25 | w9-66_25 | w10-10_80 |
| <b>set303</b> | w1 | 2-w2 | w4-41_80 | w5-76_80 | w6-32_80 | w7-1_80  | w8-23_25 | w9-66_25 | w10-10_80 |
| <b>set304</b> | w1 | 2-w2 | w4-41_80 | w5-76_80 | w6-32_80 | w7-35_60 | w8-23_25 | w9-66_25 | w10-10_80 |
| <b>set305</b> | w1 | 2-w2 | w4-41_80 | w5-76_80 | w6-32_80 | w7-40_80 | w8-23_25 | w9-66_25 | w10-10_80 |
| <b>set306</b> | w1 | 2-w2 | w4-41_80 | w5-76_80 | w6-32_80 | w7-56_40 | w8-23_25 | w9-66_25 | w10-10_80 |
| <b>set307</b> | w1 | 2-w2 | w4-41_80 | w5-70_60 | w6-28_60 | w7-97_25 | w8-23_25 | w9-66_25 | w10-10_80 |
| <b>set308</b> | w1 | 2-w2 | w4-41_80 | w5-70_60 | w6-28_60 | w7-76_40 | w8-23_25 | w9-66_25 | w10-10_80 |
| <b>set309</b> | w1 | 2-w2 | w4-41_80 | w5-70_60 | w6-28_60 | w7-95_40 | w8-23_25 | w9-66_25 | w10-10_80 |
| <b>set310</b> | w1 | 2-w2 | w4-41_80 | w5-70_60 | w6-28_60 | w7-33_40 | w8-23_25 | w9-66_25 | w10-10_80 |
| <b>set311</b> | w1 | 2-w2 | w4-41_80 | w5-70_60 | w6-28_60 | w7-72_80 | w8-23_25 | w9-66_25 | w10-10_80 |







|               |    |      |          |          |          |          |          |          |           |
|---------------|----|------|----------|----------|----------|----------|----------|----------|-----------|
| <b>set447</b> | w1 | 2-w2 | w4-41_80 | w5-70_60 | w6-32_80 | w7-72_80 | w8-23_25 | w9-66_25 | w10-10_80 |
| <b>set448</b> | w1 | 2-w2 | w4-41_80 | w5-70_60 | w6-32_80 | w7-6_40  | w8-23_25 | w9-66_25 | w10-10_80 |
| <b>set449</b> | w1 | 2-w2 | w4-41_80 | w5-70_60 | w6-32_80 | w7-9_25  | w8-23_25 | w9-66_25 | w10-10_80 |
| <b>set450</b> | w1 | 2-w2 | w4-41_80 | w5-70_60 | w6-32_80 | w7-92_60 | w8-23_25 | w9-66_25 | w10-10_80 |
| <b>set451</b> | w1 | 2-w2 | w4-41_80 | w5-70_60 | w6-32_80 | w7-40_40 | w8-23_25 | w9-66_25 | w10-10_80 |
| <b>set452</b> | w1 | 2-w2 | w4-41_80 | w5-70_60 | w6-32_80 | w7-17_60 | w8-23_25 | w9-66_25 | w10-10_80 |
| <b>set453</b> | w1 | 2-w2 | w4-41_80 | w5-70_60 | w6-32_80 | w7-47_80 | w8-23_25 | w9-66_25 | w10-10_80 |
| <b>set454</b> | w1 | 2-w2 | w4-41_80 | w5-70_60 | w6-32_80 | w7-67_25 | w8-23_25 | w9-66_25 | w10-10_80 |
| <b>set455</b> | w1 | 2-w2 | w4-41_80 | w5-70_60 | w6-32_80 | w7-86_60 | w8-23_25 | w9-66_25 | w10-10_80 |
| <b>set456</b> | w1 | 2-w2 | w4-41_80 | w5-70_60 | w6-32_80 | w7-1_80  | w8-23_25 | w9-66_25 | w10-10_80 |
| <b>set457</b> | w1 | 2-w2 | w4-41_80 | w5-70_60 | w6-32_80 | w7-35_60 | w8-23_25 | w9-66_25 | w10-10_80 |
| <b>set458</b> | w1 | 2-w2 | w4-41_80 | w5-70_60 | w6-32_80 | w7-40_80 | w8-23_25 | w9-66_25 | w10-10_80 |
| <b>set459</b> | w1 | 2-w2 | w4-41_80 | w5-70_60 | w6-32_80 | w7-56_40 | w8-23_25 | w9-66_25 | w10-10_80 |

## 10 Cartesian coordinates of $W_n$ for all 459 sets

### w1-w1

|   |              |             |              |
|---|--------------|-------------|--------------|
| O | -4.373887254 | 2.199597294 | -4.092304572 |
| H | -4.562108491 | 1.250724812 | -4.106033927 |
| H | -5.222714255 | 2.600477894 | -3.858291501 |

### w2

|   |              |             |              |
|---|--------------|-------------|--------------|
| O | -1.705990148 | 2.09296745  | -2.983665308 |
| H | -2.55489867  | 2.153994512 | -3.454606039 |
| H | -1.096812019 | 2.610267667 | -3.526978388 |
| O | -4.405188256 | 2.119243589 | -4.219588082 |
| H | -4.703655563 | 1.214373176 | -4.389475285 |
| H | -5.056025344 | 2.469463605 | -3.594626897 |

### w4-41\_80

12

|   |              |              |              |
|---|--------------|--------------|--------------|
| O | -0.216710815 | 1.630595376  | -0.383144575 |
| H | -0.854986048 | 2.030599211  | -0.988463023 |
| H | 0.083867714  | 0.82008447   | -0.838581103 |
| O | -1.02559137  | 0.513419352  | 2.119164804  |
| H | -0.782354678 | 1.013595959  | 1.315350911  |
| H | -0.648835958 | 1.025518468  | 2.846761312  |
| O | -0.241044493 | -2.086148388 | 1.198628114  |
| H | -0.506141967 | -1.272949437 | 1.670872953  |
| H | 0.327598977  | -2.559131678 | 1.820253548  |

|   |             |              |              |
|---|-------------|--------------|--------------|
| O | 0.668472908 | -0.953020433 | -1.261619121 |
| H | 0.337523972 | -1.470905029 | -2.007228907 |
| H | 0.400591759 | -1.461817871 | -0.471294915 |

**w5-59\_80**

15

|   |              |              |              |
|---|--------------|--------------|--------------|
| O | -0.654135222 | 0.920246474  | 1.676642093  |
| H | -0.344544556 | 1.046090956  | 2.583557376  |
| H | 0.105929463  | 0.511580859  | 1.212384447  |
| O | 2.382959184  | 0.908391146  | -2.125890825 |
| H | 2.792402865  | 1.7601998    | -1.917215169 |
| H | 1.656520469  | 1.135978683  | -2.723778433 |
| O | -0.606937314 | -2.544137726 | -0.457934289 |
| H | -1.356334613 | -2.168846018 | 0.044385642  |
| H | -0.538936918 | -3.45710373  | -0.148276389 |
| O | -2.562718996 | -1.122694617 | 1.087563714  |
| H | -3.343109751 | -0.725050201 | 0.679136145  |
| H | -2.009225899 | -0.361611255 | 1.353303378  |
| O | 1.31583054   | -0.508351494 | 0.250323686  |
| H | 1.70141907   | -0.118471704 | -0.552575313 |
| H | 0.796131678  | -1.271671174 | -0.063276061 |

**w5-70\_60**

15

|   |              |              |              |
|---|--------------|--------------|--------------|
| O | -0.195367053 | 0.898983601  | -1.53335214  |
| H | 0.335314025  | 0.118069403  | -1.28734317  |
| H | -0.158804688 | 0.926803707  | -2.498796298 |
| O | 1.532203449  | 0.821712057  | 1.886914942  |
| H | 1.453622399  | 1.720857094  | 1.53867609   |
| H | 1.75268023   | 0.285727364  | 1.106380521  |
| O | 1.198931891  | -1.249626621 | -0.233886436 |
| H | 1.592105922  | -2.093579766 | -0.490693312 |
| H | 0.502407556  | -1.467692613 | 0.421781374  |
| O | -2.576003252 | 0.245414119  | -0.026776767 |
| H | -1.879515967 | 0.594083926  | -0.614209027 |
| H | -3.142236221 | 1.003904987  | 0.166748195  |
| O | -0.738065178 | -1.114675207 | 1.770095886  |
| H | -0.220757201 | -0.376760901 | 2.1370549    |
| H | -1.48151591  | -0.67507115  | 1.317055242  |

**w5-76\_80**

15

|   |              |             |              |
|---|--------------|-------------|--------------|
| O | -1.090964138 | 0.609218725 | -2.459081001 |
|---|--------------|-------------|--------------|

|   |              |              |              |
|---|--------------|--------------|--------------|
| H | -1.614387351 | 1.009415414  | -3.164690824 |
| H | -0.16636585  | 0.65756922   | -2.760503838 |
| O | 1.781396572  | 0.539917247  | -2.191834978 |
| H | 1.49665088   | 0.633998089  | -1.263678408 |
| H | 2.510812339  | 1.165477743  | -2.292264433 |
| O | -0.257826354 | 1.527829966  | 2.831998474  |
| H | -0.170818887 | 0.579195425  | 3.036438635  |
| H | 0.260528011  | 1.980569961  | 3.509654364  |
| O | -0.179143041 | -1.299770552 | 2.307526778  |
| H | -0.066299361 | -0.960707232 | 1.400154262  |
| H | 0.37451075   | -2.089931174 | 2.351387055  |
| O | 0.089381745  | 0.579912772  | 0.135436311  |
| H | -0.06537008  | 1.199569156  | 0.870089908  |
| H | -0.617625236 | 0.74183524   | -0.513672303 |

**w6-13\_40**

18

|   |              |              |              |
|---|--------------|--------------|--------------|
| O | -1.446711504 | 2.148750304  | -1.889912863 |
| H | -0.533093926 | 1.812104361  | -1.994423055 |
| H | -1.776467154 | 2.249541933  | -2.792386143 |
| O | -2.405230771 | 0.457927547  | 0.149845306  |
| H | -2.870794688 | 0.974870999  | 0.820540161  |
| H | -2.204962729 | 1.093239947  | -0.567324185 |
| O | -2.309810285 | -2.459421706 | -0.145732011 |
| H | -2.625907007 | -1.540710972 | -0.191842083 |
| H | -2.89864652  | -2.955640343 | -0.729034692 |
| O | 2.492140905  | 0.823683033  | 0.68501363   |
| H | 3.198983681  | 0.675868357  | 1.326467576  |
| H | 1.877938236  | 0.08011093   | 0.810550396  |
| O | 1.061353545  | 0.840774373  | -1.950009612 |
| H | 0.799482377  | 0.069574843  | -1.416078781 |
| H | 1.78576929   | 1.209047114  | -1.418528776 |
| O | 0.195214459  | -0.898431955 | 0.265821225  |
| H | -0.593626732 | -0.352669848 | 0.434692177  |
| H | -0.188791176 | -1.782138918 | 0.150571729  |

**w6-14\_60**

18

|   |              |              |              |
|---|--------------|--------------|--------------|
| O | -2.232446696 | -1.031536571 | -1.622016728 |
| H | -3.147789254 | -0.722826678 | -1.613366024 |
| H | -1.985487547 | -1.10537753  | -0.677746576 |
| O | -0.161281221 | 0.228653241  | -3.09615916  |
| H | 0.104112637  | -0.423747914 | -3.757895697 |
| H | -0.904257039 | -0.194919308 | -2.622182047 |



|   |              |              |              |
|---|--------------|--------------|--------------|
| O | 1.804566141  | 1.319789404  | -1.366145383 |
| H | 1.141174629  | 0.953799565  | -1.985130712 |
| H | 1.843141758  | 2.259643447  | -1.587206613 |
| O | 1.234172989  | -2.675014217 | 1.408231657  |
| H | 1.518928059  | -1.758128928 | 1.245725646  |
| H | 1.790693945  | -3.21259924  | 0.829350468  |
| O | 1.285539714  | 0.243183657  | 1.20178247   |
| H | 1.508935908  | 0.701046385  | 0.366734076  |
| H | 1.698981534  | 0.770199519  | 1.898119765  |
| O | -1.331274868 | -1.180584483 | 1.059080912  |
| H | -0.661164073 | -0.486918004 | 1.182633141  |
| H | -0.804656617 | -1.986102346 | 1.197390805  |

**w6-28\_60**

18

|   |              |              |              |
|---|--------------|--------------|--------------|
| O | 0.626629316  | 2.100446744  | -0.326369701 |
| H | 1.4816524    | 1.958052378  | 0.115504839  |
| H | 0.714082312  | 1.510995636  | -1.094901498 |
| O | -0.795290775 | -1.880047387 | -3.299457815 |
| H | -1.570402947 | -1.38033272  | -2.981378121 |
| H | -0.921560014 | -1.965881858 | -4.252846077 |
| O | -1.18606543  | 0.10662737   | 0.533367548  |
| H | -0.631234904 | 0.911475905  | 0.485062148  |
| H | -1.461136904 | 0.030992255  | 1.456203516  |
| O | 2.95300522   | 0.429617621  | 0.394193215  |
| H | 3.902732184  | 0.258778436  | 0.352927394  |
| H | 2.56093816   | -0.154066373 | -0.27955327  |
| O | -2.789848969 | -0.36966025  | -1.84162872  |
| H | -2.346341218 | -0.135454024 | -1.00549299  |
| H | -3.234906399 | 0.444326747  | -2.112571264 |
| O | 0.962230281  | -0.699758314 | -1.334203854 |
| H | 0.276436199  | -0.818648046 | -0.656154617 |
| H | 0.602301488  | -1.16660412  | -2.108630733 |

**w6-32\_80**

18

|   |              |              |              |
|---|--------------|--------------|--------------|
| O | 0.84392654   | -3.639803694 | 0.402301919  |
| H | 1.507916396  | -4.222170026 | 0.010898896  |
| H | 1.348209597  | -2.867533355 | 0.729495623  |
| O | 1.990817304  | -1.14948465  | 1.173591283  |
| H | 1.539399167  | -0.848850343 | 1.980148443  |
| H | 1.542399032  | -0.615853689 | 0.493260045  |
| O | -1.267272821 | -2.27475235  | -0.955568964 |
| H | -2.072418676 | -2.466517046 | -0.455514048 |

|   |              |              |              |
|---|--------------|--------------|--------------|
| H | -0.590050703 | -2.846559539 | -0.542797448 |
| O | 0.087178731  | 2.300159581  | -2.463419101 |
| H | 0.959917356  | 2.407889932  | -2.867056695 |
| H | -0.221865736 | 3.204250427  | -2.31265218  |
| O | -0.344987397 | 0.200265164  | 2.489210706  |
| H | -0.430519298 | 0.43183049   | 1.546239678  |
| H | -0.598362696 | 1.000905459  | 2.966612781  |
| O | -0.068494244 | 0.242669597  | -0.387027445 |
| H | -0.557911632 | -0.537246826 | -0.714306858 |
| H | -0.08294092  | 0.893690868  | -1.108166635 |

**w6-38\_40**

18

|   |              |              |              |
|---|--------------|--------------|--------------|
| O | -0.366700441 | -1.466840739 | 3.134960989  |
| H | -0.880727699 | -0.843686464 | 2.586938996  |
| H | -1.002099944 | -2.149114147 | 3.390236052  |
| O | 0.760845218  | 2.421120792  | 0.666465086  |
| H | 0.91041719   | 3.296739994  | 1.044923251  |
| H | -0.08257302  | 2.115844461  | 1.041497181  |
| O | 1.82154665   | -2.089709228 | 1.365799489  |
| H | 2.66075508   | -2.06465127  | 1.844208357  |
| H | 1.140713741  | -1.953732714 | 2.052808682  |
| O | -1.329694145 | 0.424056223  | 1.185008533  |
| H | -0.657304296 | 0.094282165  | 0.556480565  |
| H | -2.14259252  | 0.371385998  | 0.659313356  |
| O | -1.816830126 | -0.449445466 | -1.696351291 |
| H | -0.847023605 | -0.465448005 | -1.625747683 |
| H | -1.999327562 | -0.656248283 | -2.62217843  |
| O | 0.870147335  | -0.204875362 | -0.571340912 |
| H | 1.366346296  | -0.832405105 | -0.012180141 |
| H | 1.238621848  | 0.67007715   | -0.364102081 |

**w6-47\_40**

18

|   |              |              |              |
|---|--------------|--------------|--------------|
| O | -2.644997876 | -1.71455351  | -1.356158492 |
| H | -1.790922029 | -2.097572262 | -1.637440921 |
| H | -2.827704728 | -2.107960187 | -0.493308105 |
| O | -0.10181788  | -2.016789371 | -2.599969927 |
| H | 0.682033057  | -1.9498076   | -2.025743774 |
| H | -0.251090711 | -1.102792002 | -2.891534921 |
| O | 0.818247393  | -0.815978885 | 1.675979361  |
| H | 0.554098761  | -0.019289621 | 1.176397262  |
| H | 0.16804483   | -0.91455692  | 2.38209445   |
| O | -1.447578803 | 0.688895507  | -2.293937968 |

|   |              |              |              |
|---|--------------|--------------|--------------|
| H | -1.987135639 | 1.35215022   | -2.7438493   |
| H | -2.08142086  | 0.05061756   | -1.914781457 |
| O | 2.113084168  | -1.543900735 | -0.742727465 |
| H | 2.978337723  | -1.973733641 | -0.730347346 |
| H | 1.791536261  | -1.583579127 | 0.176808006  |
| O | 0.720385597  | 1.131498532  | -0.377310456 |
| H | 1.397092528  | 0.564471524  | -0.781676317 |
| H | -0.02159179  | 1.088900518  | -1.006912631 |

**w6-59\_25**

18

|   |              |              |              |
|---|--------------|--------------|--------------|
| O | 1.710372389  | -2.737773681 | -2.019592285 |
| H | 1.036955465  | -2.942673541 | -1.339420084 |
| H | 2.410386975  | -3.388644723 | -1.879347428 |
| O | -2.335173815 | -0.960835406 | -0.889909145 |
| H | -3.208160878 | -0.62191299  | -0.65272258  |
| H | -1.708043584 | -0.415783527 | -0.380438863 |
| O | -0.253953516 | -2.912645783 | 0.03185466   |
| H | -1.127384686 | -2.728876624 | -0.35307566  |
| H | -0.047751252 | -2.05909576  | 0.45272382   |
| O | 0.597439231  | 1.660792833  | 2.817843069  |
| H | 0.969032068  | 1.172860874  | 3.56646184   |
| H | 1.175311087  | 2.431333901  | 2.725298785  |
| O | 1.849735939  | 0.094568035  | -1.70323861  |
| H | 1.484226315  | 0.467537424  | -2.517190531 |
| H | 1.907175512  | -0.864084494 | -1.887389883 |
| O | 0.028688265  | -0.027525472 | 0.486834178  |
| H | 0.692883007  | 0.14606694   | -0.208407668 |
| H | 0.245431478  | 0.574351993  | 1.218616385  |

**w6-65\_40**

18

|   |              |              |              |
|---|--------------|--------------|--------------|
| O | 0.573749965  | 0.237365766  | -2.974898083 |
| H | -0.355950254 | 0.509316724  | -2.90849971  |
| H | 0.968254714  | 0.689082863  | -2.210891059 |
| O | -2.651369016 | -1.674134931 | -0.979845285 |
| H | -3.303840919 | -1.873135347 | -0.29541951  |
| H | -2.608438228 | -0.700989401 | -1.009576548 |
| O | 1.967881902  | 1.604209319  | 2.461485998  |
| H | 1.735119111  | 2.364033774  | 3.01272433   |
| H | 2.931452271  | 1.647600305  | 2.385049154  |
| O | -1.912202764 | 1.110965369  | -1.2698935   |
| H | -2.374928969 | 1.956469098  | -1.206895441 |
| H | -1.134506391 | 1.194299187  | -0.683077171 |

|   |              |              |              |
|---|--------------|--------------|--------------|
| O | 0.27284322   | -1.882010547 | -0.861342472 |
| H | 0.427242293  | -1.529090959 | -1.7554      |
| H | -0.689574063 | -2.033996984 | -0.84883679  |
| O | 0.584049182  | 0.796091822  | 0.003843028  |
| H | 1.011309946  | 1.029534238  | 0.844504611  |
| H | 0.565088002  | -0.181320296 | -0.032091553 |

**w6-93\_80**

18

|   |              |              |              |
|---|--------------|--------------|--------------|
| O | -0.997721434 | -0.594295534 | -2.721705079 |
| H | -1.462981146 | -0.368611534 | -3.537789783 |
| H | -0.836427288 | 0.262163725  | -2.278577183 |
| O | -1.574180326 | -2.075183707 | -0.290136328 |
| H | -1.622514202 | -1.641830317 | -1.161709049 |
| H | -1.74509511  | -1.350018473 | 0.335569786  |
| O | 1.283063201  | -2.172020842 | -0.26521167  |
| H | 1.525291839  | -2.201511039 | -1.201528612 |
| H | 0.310337073  | -2.287059671 | -0.276501336 |
| O | -1.519509347 | 0.295592389  | 1.504311791  |
| H | -1.895282103 | 0.368111482  | 2.391845285  |
| H | -0.55272618  | 0.304360054  | 1.631136972  |
| O | -0.529051341 | 1.659092337  | -1.015304191 |
| H | 0.279857589  | 1.423115964  | -0.529264029 |
| H | -1.209884225 | 1.549048903  | -0.331808389 |
| O | 1.299484364  | 0.35555512   | 0.942762648  |
| H | 1.439501382  | -0.53095686  | 0.547065886  |
| H | 2.120657252  | 0.559708003  | 1.40890328   |

**w7-17\_60**

21

|   |              |              |              |
|---|--------------|--------------|--------------|
| O | 0.591446065  | 2.424105752  | -2.598023905 |
| H | 1.150371396  | 1.663550285  | -2.349782261 |
| H | 0.106816125  | 2.123744151  | -3.378988495 |
| O | 2.252904141  | 0.214261339  | -1.742770367 |
| H | 3.176321881  | 0.260472217  | -2.02602468  |
| H | 2.29195797   | 0.178950292  | -0.767254285 |
| O | 0.754003724  | -2.356081088 | -0.742456521 |
| H | 1.186343896  | -1.947196287 | 0.027379162  |
| H | 1.082579405  | -1.805227105 | -1.470382162 |
| O | 1.856763699  | -0.26157136  | 1.042427847  |
| H | 0.98591751   | 0.152463629  | 1.238563574  |
| H | 2.367505191  | -0.177851611 | 1.857975799  |
| O | -1.830542121 | -1.687261999 | 0.316873452  |
| H | -2.616237631 | -2.03688297  | -0.12128769  |

|   |              |              |              |
|---|--------------|--------------|--------------|
| H | -1.072132155 | -2.030232413 | -0.192391151 |
| O | -1.144335665 | 3.014179588  | -0.389633601 |
| H | -0.539915466 | 2.908703538  | -1.149173507 |
| H | -1.02827894  | 3.930183616  | -0.105181218 |
| O | -0.692730828 | 0.748731815  | 1.350091451  |
| H | -1.27104128  | 0.037606694  | 1.019986616  |
| H | -0.906796922 | 1.523791919  | 0.798981944  |

**w7-1\_80**

21

|   |              |              |              |
|---|--------------|--------------|--------------|
| O | 2.481108659  | -0.041791943 | 0.678241037  |
| H | 1.80852804   | 0.556226866  | 1.07242488   |
| H | 3.177583523  | -0.121195967 | 1.342946635  |
| O | -1.660714451 | 0.339180699  | 2.944923789  |
| H | -1.626087386 | 0.357901843  | 3.910372405  |
| H | -1.59469962  | -0.607364134 | 2.711975153  |
| O | 0.259697354  | -1.741627167 | -0.341941045 |
| H | 1.091785183  | -1.392922772 | 0.022327052  |
| H | -0.100767606 | -0.973814216 | -0.817965618 |
| O | 0.332793356  | 1.607135096  | 1.282828966  |
| H | -0.075868089 | 1.564389397  | 0.400840917  |
| H | -0.348650225 | 1.243783934  | 1.879503302  |
| O | -1.25808088  | -2.324954781 | 1.99879787   |
| H | -1.948650305 | -2.968016903 | 1.791897767  |
| H | -0.775922822 | -2.198674532 | 1.156803766  |
| O | 2.47404103   | 1.037577033  | -1.992603452 |
| H | 2.901579132  | 0.432008863  | -2.613457619 |
| H | 2.68402461   | 0.672173215  | -1.112121348 |
| O | -0.313709545 | 0.961564282  | -1.509615801 |
| H | 0.5804934    | 1.089796823  | -1.884400349 |
| H | -0.919103355 | 1.380854366  | -2.134998304 |

**w7-33\_40**

21

|   |              |              |              |
|---|--------------|--------------|--------------|
| O | -0.402794793 | 3.236302091  | 1.697158111  |
| H | 0.357348662  | 2.712429542  | 1.368528181  |
| H | -0.159043375 | 3.480452898  | 2.59956195   |
| O | 2.453463839  | 1.821134583  | -2.038418185 |
| H | 3.309924152  | 1.468955271  | -2.31548423  |
| H | 1.801986354  | 1.203616109  | -2.423009603 |
| O | -0.711735479 | -3.017476043 | 1.14548714   |
| H | 0.105756847  | -3.164218831 | 1.642826988  |
| H | -1.414879992 | -3.227059906 | 1.776576697  |
| O | 0.412706268  | -0.071235983 | -2.773832338 |

|   |              |              |              |
|---|--------------|--------------|--------------|
| H | -0.068652055 | -0.23357352  | -1.940016959 |
| H | -0.278749525 | 0.062481078  | -3.435103501 |
| O | -2.500041758 | 1.462874987  | 0.973430179  |
| H | -3.142992249 | 1.954541987  | 0.445333911  |
| H | -1.868858447 | 2.142966722  | 1.284153179  |
| O | 1.50282151   | 1.408225637  | 0.697866528  |
| H | 0.882927153  | 0.694791645  | 0.461006636  |
| H | 1.932324664  | 1.62289053   | -0.150907017 |
| O | -0.647663186 | -0.396444682 | -0.137553633 |
| H | -1.372950299 | 0.159951837  | 0.20643725   |
| H | -0.763038293 | -1.267625951 | 0.280308716  |

**w7-35\_60**

21

|   |              |              |              |
|---|--------------|--------------|--------------|
| O | 0.240677944  | -0.518798197 | 2.719373569  |
| H | -0.274309687 | 0.236981868  | 3.058773935  |
| H | 0.966898443  | -0.098581734 | 2.226172734  |
| O | -1.421754643 | 1.794529847  | 3.203140384  |
| H | -1.394096986 | 2.490407647  | 3.872613398  |
| H | -1.123685314 | 2.224643429  | 2.376472617  |
| O | -1.873043286 | 0.586996753  | -0.958053553 |
| H | -1.940745632 | -0.178068621 | -0.356696941 |
| H | -2.778709786 | 0.765663775  | -1.244820852 |
| O | -0.397186284 | 2.56478323   | 0.661739021  |
| H | 0.480977234  | 2.146370072  | 0.645509694  |
| H | -0.92161719  | 2.005585839  | 0.060802511  |
| O | 1.983739905  | 0.77364658   | 0.720046998  |
| H | 2.936374051  | 0.917714563  | 0.646422516  |
| H | 1.744708392  | 0.214997995  | -0.048223055 |
| O | -1.212501783 | -1.700449416 | 0.659162559  |
| H | -1.643653484 | -2.521308061 | 0.930550532  |
| H | -0.770681256 | -1.361296192 | 1.468593396  |
| O | 0.797794112  | -0.810251219 | -1.295288795 |
| H | 0.127437842  | -0.23632778  | -1.700032146 |
| H | 0.25264741   | -1.389380378 | -0.733738522 |

**w7-40\_40**

21

|   |              |              |             |
|---|--------------|--------------|-------------|
| O | -0.607422597 | 1.294363849  | 3.713617296 |
| H | -1.005989641 | 1.91879677   | 4.333633407 |
| H | 0.056968339  | 1.819695518  | 3.224580312 |
| O | -1.754148896 | -0.254152737 | 1.636624848 |
| H | -1.518006344 | 0.244708839  | 2.444326885 |
| H | -2.72015192  | -0.266609947 | 1.619904088 |

|   |              |              |              |
|---|--------------|--------------|--------------|
| O | -0.659370874 | -2.321890643 | -2.265878584 |
| H | -0.352139345 | -2.385335978 | -1.339040994 |
| H | -0.293646763 | -3.105177691 | -2.697709699 |
| O | 0.077973337  | 0.383971122  | -2.855432598 |
| H | -0.196981117 | -0.552311191 | -2.80673403  |
| H | -0.536432052 | 0.791158472  | -3.47995277  |
| O | 0.301229227  | -2.105988721 | 0.417185866  |
| H | -0.43605207  | -1.881626986 | 1.009241767  |
| H | 0.713918116  | -1.234452179 | 0.287177387  |
| O | 1.24026902   | 2.623066026  | 1.992189969  |
| H | 1.053847881  | 2.132724473  | 1.167819631  |
| H | 2.189832855  | 2.506667848  | 2.131568667  |
| O | 0.343113143  | 0.868439876  | -0.042587961 |
| H | -0.532731105 | 0.625972766  | 0.306673102  |
| H | 0.235430806  | 0.868010513  | -1.01229659  |

**w7-40\_80**

21

|   |              |              |              |
|---|--------------|--------------|--------------|
| O | 2.310453465  | 1.923735378  | 2.047511913  |
| H | 2.780071136  | 1.154885674  | 1.676732949  |
| H | 1.64599058   | 2.11177631   | 1.363585777  |
| O | -0.08059753  | 1.53027615   | 3.58489637   |
| H | -0.182967036 | 2.096619204  | 4.360889982  |
| H | 0.856547817  | 1.626026788  | 3.325728389  |
| O | 3.208926469  | -0.39676935  | 0.48710709   |
| H | 2.36892178   | -0.683767111 | 0.083841663  |
| H | 3.684732417  | -1.215106502 | 0.67875599   |
| O | -0.48056055  | 1.399923854  | -2.179209216 |
| H | -0.630475738 | 1.841617141  | -1.324335821 |
| H | 0.004045289  | 2.048991787  | -2.706993135 |
| O | -0.396033713 | 1.651582435  | 0.678078084  |
| H | -0.14651615  | 0.7177976    | 0.55500275   |
| H | -0.623720684 | 1.718031202  | 1.621238114  |
| O | -1.125656712 | -3.12973317  | -0.269255378 |
| H | -1.743990666 | -3.452786762 | -0.93976923  |
| H | -1.669908955 | -3.020133505 | 0.523804571  |
| O | 0.552455379  | -0.770528038 | -0.583808426 |
| H | -0.003496144 | -1.568564867 | -0.612125573 |
| H | 0.292199546  | -0.237514219 | -1.357136864 |

**w7-47\_80**

21

|   |              |              |              |
|---|--------------|--------------|--------------|
| O | -2.919796935 | -1.322022861 | -1.035034515 |
| H | -2.280960085 | -1.328999798 | -0.299420684 |

|   |              |              |              |
|---|--------------|--------------|--------------|
| H | -3.516839354 | -2.059180616 | -0.852490325 |
| O | 1.858640881  | 1.481125293  | 2.516444849  |
| H | 2.717709729  | 1.873706178  | 2.312741759  |
| H | 1.26209433   | 1.812007863  | 1.820261299  |
| O | 0.029565557  | 2.092352659  | -2.19647967  |
| H | -0.093126539 | 1.143460358  | -2.407400447 |
| H | 0.758035978  | 2.38150892   | -2.760939931 |
| O | 1.327174367  | -1.349257426 | 2.671580554  |
| H | 1.611105274  | -0.417426196 | 2.73424659   |
| H | 1.094784793  | -1.59482538  | 3.577023627  |
| O | -0.220836967 | 2.089698255  | 0.597369897  |
| H | -0.948493198 | 2.68058229   | 0.83393286   |
| H | -0.102291625 | 2.209541192  | -0.367395945 |
| O | -0.327607616 | -0.701136529 | -2.394091226 |
| H | -1.26708712  | -0.948687617 | -2.427911133 |
| H | -0.105724481 | -0.919113054 | -1.471228448 |
| O | -0.547372483 | -0.822955051 | 0.528085176  |
| H | 0.01162415   | -1.158289611 | 1.252590572  |
| H | -0.529008655 | 0.143451133  | 0.64833514   |

**w7-56\_40**

21

|   |              |              |              |
|---|--------------|--------------|--------------|
| O | -2.415662676 | 1.42677242   | 1.901444529  |
| H | -2.0539014   | 2.282002584  | 2.169917307  |
| H | -1.935849292 | 0.774041398  | 2.447854094  |
| O | -1.036153925 | -0.638762434 | 3.309751877  |
| H | -0.755867059 | -0.613723949 | 4.233840922  |
| H | -0.294942645 | -1.063555174 | 2.835922056  |
| O | -0.484730859 | -0.943710568 | -3.728470978 |
| H | -0.223776045 | -1.607239916 | -4.380606115 |
| H | -0.159174004 | -1.285089623 | -2.87703183  |
| O | 0.401689677  | 1.61386159   | -2.431607719 |
| H | -0.446681587 | 1.674121564  | -1.961389333 |
| H | 0.184018424  | 1.031237838  | -3.178984175 |
| O | 1.065797963  | -1.814657542 | 1.757563944  |
| H | 0.912653644  | -1.55618151  | 0.827521943  |
| H | 1.169289409  | -2.775106826 | 1.726381384  |
| O | -2.003847938 | 0.679234529  | -0.783410326 |
| H | -2.837660426 | 0.458725114  | -1.220026237 |
| H | -2.251434804 | 0.968152552  | 0.118267812  |
| O | 0.359293788  | -0.950699357 | -0.881747866 |
| H | 0.842208751  | -0.169202079 | -1.205913777 |
| H | -0.528888996 | -0.570520607 | -0.735757512 |

**w7-67\_25**



21

|   |              |              |              |
|---|--------------|--------------|--------------|
| O | -3.403838319 | 1.312750393  | 0.463513892  |
| H | -3.946017816 | 1.994183818  | 0.882289295  |
| H | -2.898187092 | 1.781484768  | -0.232146609 |
| O | -3.862361005 | -1.578145053 | 0.32324819   |
| H | -3.948411906 | -0.625697633 | 0.143435532  |
| H | -4.23337917  | -2.013983107 | -0.455288539 |
| O | 1.041686681  | -0.389741689 | 3.02545802   |
| H | 0.847903502  | -0.172167776 | 3.946537467  |
| H | 0.16773551   | -0.500548472 | 2.607785154  |
| O | -1.327094898 | -0.541103056 | 1.402365436  |
| H | -1.90286141  | -1.285032339 | 1.15791631   |
| H | -1.936937061 | 0.215078729  | 1.338014355  |
| O | -1.643810628 | 2.441817513  | -1.413190167 |
| H | -0.848789737 | 1.892853318  | -1.248076589 |
| H | -1.739848047 | 2.44880258   | -2.374471896 |
| O | 2.565882761  | 1.135339205  | 1.10896792   |
| H | 2.162839879  | 0.64530416   | 1.850927285  |
| H | 3.412972132  | 0.692958283  | 0.96267635   |
| O | 0.358889015  | 0.59640715   | -0.730861135 |
| H | -0.132546009 | 0.048492642  | -0.093679993 |
| H | 1.164083617  | 0.843066565  | -0.239320276 |

**w7-6\_40**

21

|   |              |              |              |
|---|--------------|--------------|--------------|
| O | 2.268017604  | -2.20207442  | 0.35994838   |
| H | 2.237305066  | -3.168151447 | 0.377463329  |
| H | 2.284492524  | -1.975430438 | -0.590076821 |
| O | 0.030330514  | 1.892051077  | 2.273913662  |
| H | -0.033080611 | 2.438017377  | 1.467955822  |
| H | 0.743164037  | 2.293593972  | 2.788074816  |
| O | -0.31699462  | 3.047140462  | -0.350600893 |
| H | -0.265486471 | 2.289274439  | -0.963078131 |
| H | -0.031876131 | 3.811976845  | -0.866396898 |
| O | -2.386881448 | -1.234469566 | -0.653117103 |
| H | -3.27478131  | -1.309230775 | -0.279855583 |
| H | -1.796866633 | -1.168011068 | 0.118141912  |
| O | 2.028148883  | -1.284935522 | -2.359795301 |
| H | 1.293093971  | -0.644937299 | -2.302776799 |
| H | 2.722431309  | -0.82106041  | -2.846013372 |
| O | -0.038890024 | -0.636562068 | 0.959946934  |
| H | 0.766542641  | -1.186392156 | 0.980248405  |
| H | 0.102519873  | 0.101050484  | 1.582187865  |
| O | -0.155586624 | 0.467988156  | -1.642372827 |

|   |              |             |              |
|---|--------------|-------------|--------------|
| H | -0.047230107 | 0.119607985 | -0.732283605 |
| H | -1.033902444 | 0.121094371 | -1.873963792 |

**w7-72\_80**

21

|   |              |              |              |
|---|--------------|--------------|--------------|
| O | 2.427161919  | -2.241078707 | 0.952265938  |
| H | 1.980002269  | -2.182456876 | 1.821198762  |
| H | 3.154139939  | -2.863528364 | 1.085431787  |
| O | -2.329189033 | 1.351152218  | -0.252250633 |
| H | -1.569200614 | 1.615683347  | -0.805463152 |
| H | -2.704857062 | 2.18209016   | 0.067051422  |
| O | 1.603784363  | 0.620586274  | 0.443734078  |
| H | 0.780080307  | 0.226799444  | 0.789693484  |
| H | 2.214762826  | -0.133279541 | 0.451695953  |
| O | 0.123387394  | 1.671898468  | -1.737974945 |
| H | 0.521619846  | 2.433983494  | -2.178031479 |
| H | 0.795715751  | 1.372667755  | -1.094762389 |
| O | 0.734794864  | -1.839220597 | 3.201930651  |
| H | 0.952241251  | -1.249200505 | 3.936275494  |
| H | 0.01465705   | -1.382091899 | 2.728473474  |
| O | -0.001198347 | -2.754940821 | -0.582419489 |
| H | 0.080335093  | -2.495166665 | -1.510784638 |
| H | 0.904754613  | -2.684217759 | -0.228440627 |
| O | -0.893115109 | -0.681934745 | 1.177417934  |
| H | -0.833302906 | -1.386030434 | 0.503781214  |
| H | -1.549784414 | -0.050194248 | 0.83187716   |

**w7-76\_40**

21

|   |              |              |              |
|---|--------------|--------------|--------------|
| O | -3.042722143 | 1.763004052  | -1.712936016 |
| H | -2.154375739 | 1.604658081  | -2.087011452 |
| H | -3.292433036 | 2.640328723  | -2.031791397 |
| O | 2.93554631   | -1.943600983 | 2.104413363  |
| H | 2.196799809  | -2.305534595 | 1.57742972   |
| H | 3.722312357  | -2.391126071 | 1.766563507  |
| O | 0.558171298  | -2.526710888 | 0.617136802  |
| H | 0.42693207   | -2.986303693 | -0.222590914 |
| H | 0.282896131  | -1.60509335  | 0.440975513  |
| O | -2.523733282 | 1.181368582  | 1.037209691  |
| H | -3.165795768 | 0.53565644   | 1.361825346  |
| H | -2.837029429 | 1.411567479  | 0.140472656  |
| O | -0.35170798  | 1.017266287  | -2.37501213  |
| H | 0.365500882  | 1.528806686  | -2.771645104 |
| H | -0.039419598 | 0.807141702  | -1.472554373 |

|   |              |              |             |
|---|--------------|--------------|-------------|
| O | 2.446055503  | 0.851054907  | 1.781427882 |
| H | 2.473503489  | 1.296022188  | 2.638908797 |
| H | 2.725163145  | -0.066459873 | 1.970380107 |
| O | 0.069534177  | 0.268208393  | 0.332715491 |
| H | 0.794788727  | 0.609394586  | 0.891019692 |
| H | -0.761236925 | 0.600281341  | 0.72557282  |

**w7-86\_60**

21

|   |              |              |              |
|---|--------------|--------------|--------------|
| O | 1.732964438  | 0.855578169  | 2.437141543  |
| H | 1.238601485  | 0.015654476  | 2.374621025  |
| H | 1.125077421  | 1.462915049  | 2.880646963  |
| O | -1.495418961 | 0.510534172  | 0.162062095  |
| H | -0.793329891 | -0.098978975 | -0.127714494 |
| H | -1.720152336 | 0.197949134  | 1.048717739  |
| O | -0.123823043 | 2.350113534  | -1.656597826 |
| H | 0.745003556  | 2.249378913  | -1.23109532  |
| H | -0.734332588 | 2.031916938  | -0.969235236 |
| O | 2.35526056   | 1.346777575  | -0.279433603 |
| H | 3.287398407  | 1.555708072  | -0.426124634 |
| H | 2.250908677  | 1.296560926  | 0.692165997  |
| O | 0.340124399  | -1.617571564 | 1.900196035  |
| H | 0.510678864  | -1.724960856 | 0.946536787  |
| H | 0.595305832  | -2.461534668 | 2.296351774  |
| O | -0.021677118 | 0.01955364   | -3.352961662 |
| H | -0.753326686 | -0.069135007 | -3.977357573 |
| H | -0.160125892 | 0.886354475  | -2.921854209 |
| O | 0.828901919  | -1.053911511 | -0.831690703 |
| H | 1.481313198  | -0.332713105 | -0.769089096 |
| H | 0.52585776   | -1.002449386 | -1.756365602 |

**w7-92\_60**

21

|   |              |              |              |
|---|--------------|--------------|--------------|
| O | 1.740597281  | 1.680156251  | 2.670524846  |
| H | 1.565489224  | 2.363187059  | 2.001528281  |
| H | 1.139342398  | 1.878965866  | 3.399862871  |
| O | -3.729392857 | -0.664400531 | -1.703888003 |
| H | -4.518970538 | -0.192563079 | -2.000618756 |
| H | -3.038070193 | -0.420564501 | -2.350430964 |
| O | -1.467718395 | 0.142483414  | -3.253048655 |
| H | -0.862695995 | 0.379352208  | -2.522658789 |
| H | -0.959507905 | -0.467676095 | -3.804005146 |
| O | 1.787690567  | 2.883393096  | -0.012401064 |
| H | 2.258350586  | 3.621456737  | -0.421323949 |

|   |              |              |              |
|---|--------------|--------------|--------------|
| H | 2.392646065  | 2.116872249  | -0.072366725 |
| O | 2.689453664  | 0.21454193   | 0.26746548   |
| H | 1.810401251  | 0.008840304  | -0.097553547 |
| H | 2.517362878  | 0.287077835  | 1.221679606  |
| O | -2.321065375 | 0.007683421  | 0.685090943  |
| H | -2.916536629 | -0.261320822 | -0.042277926 |
| H | -2.284894628 | -0.762695456 | 1.267929965  |
| O | -0.032739263 | 0.719090943  | -0.848611422 |
| H | 0.271851559  | 1.619800045  | -0.646075031 |
| H | -0.766733693 | 0.545799124  | -0.226192018 |

**w7-95\_40**

21

|   |              |              |              |
|---|--------------|--------------|--------------|
| O | -1.6691687   | 1.130177588  | -2.24909164  |
| H | -1.989036723 | 0.673516241  | -1.449347544 |
| H | -2.222357765 | 0.789897748  | -2.964456762 |
| O | -0.899956422 | 0.240174961  | 2.801838813  |
| H | -0.112257137 | 0.221979363  | 2.22688437   |
| H | -0.683271359 | 0.864426135  | 3.506904608  |
| O | -1.006395394 | -2.605748517 | 1.287587208  |
| H | -1.124895675 | -2.339350469 | 2.212357302  |
| H | -0.169962088 | -2.169974477 | 1.047604047  |
| O | -2.305135018 | -0.187043156 | 0.207249209  |
| H | -2.204280481 | 0.248589607  | 1.069830328  |
| H | -2.106462449 | -1.116794168 | 0.422586999  |
| O | 2.84319534   | 0.75104074   | -1.015198774 |
| H | 2.312066947  | 1.2220215    | -1.686712811 |
| H | 3.446311879  | 0.195004449  | -1.526377537 |
| O | 1.003941501  | 2.046022305  | -2.771361693 |
| H | 0.945249227  | 3.01060127   | -2.783828804 |
| H | 0.090295505  | 1.750018331  | -2.59952362  |
| O | 0.704572051  | -0.348850629 | 0.527511803  |
| H | -0.053752893 | -0.095934643 | -0.023032498 |
| H | 1.486629654  | -0.027954174 | 0.039106994  |

**w7-97\_25**

21

|   |              |              |              |
|---|--------------|--------------|--------------|
| O | -0.163385513 | 3.350291467  | -0.43915292  |
| H | 0.443998868  | 2.601936964  | -0.585656008 |
| H | 0.416924098  | 4.108122666  | -0.288459124 |
| O | -1.479481519 | -2.07446365  | -0.954817431 |
| H | -1.538543826 | -2.958961095 | -0.569518457 |
| H | -1.410137986 | -1.473821731 | -0.186907989 |
| O | 1.914669475  | -0.029194946 | 2.000648493  |

|   |              |              |              |
|---|--------------|--------------|--------------|
| H | 0.957392789  | -0.191276896 | 2.066830534  |
| H | 2.308112547  | -0.483015312 | 2.756362384  |
| O | 0.79810743   | -1.237150472 | -2.499594378 |
| H | 0.555997462  | -1.116983685 | -3.427432796 |
| H | -0.004374456 | -1.603128327 | -2.07914014  |
| O | 1.307058911  | 0.880612931  | -0.658571647 |
| H | 1.913899534  | 0.54990899   | 0.025156124  |
| H | 1.302535878  | 0.205873119  | -1.363966637 |
| O | -2.221436501 | 2.416669735  | 1.352799425  |
| H | -3.085156701 | 2.603415584  | 0.960893426  |
| H | -1.585092158 | 2.867150447  | 0.764346107  |
| O | -0.830948231 | -0.096721163 | 1.008409547  |
| H | -1.442089007 | 0.62833364   | 1.239251354  |
| H | -0.226791094 | 0.320801734  | 0.363770132  |

**w7-9\_25**

21

|   |              |              |              |
|---|--------------|--------------|--------------|
| O | 3.033471185  | 1.853655056  | -1.601553471 |
| H | 3.25379475   | 1.782003926  | -2.540164102 |
| H | 2.829194877  | 0.937880799  | -1.329707857 |
| O | 0.490618534  | 3.126802822  | -0.973983177 |
| H | 1.367055732  | 2.791935243  | -1.240941236 |
| H | -0.128935154 | 2.546260709  | -1.452724994 |
| O | 2.288229018  | -0.755715282 | -0.633558461 |
| H | 2.84831671   | -1.099617399 | 0.075309506  |
| H | 1.404873775  | -0.671814995 | -0.225211398 |
| O | -1.913689427 | -2.488068257 | 1.551062542  |
| H | -1.789747896 | -3.348185268 | 1.125681797  |
| H | -2.078352    | -2.699213629 | 2.480610866  |
| O | -0.086091238 | 2.243886852  | 1.636097913  |
| H | 0.532894062  | 2.591520522  | 2.290922572  |
| H | 0.170827437  | 2.676430998  | 0.793795303  |
| O | -1.261515811 | 1.007169503  | -1.965678946 |
| H | -1.097285039 | 0.465073894  | -1.170914711 |
| H | -2.22207659  | 1.110854234  | -1.995615235 |
| O | -0.33244304  | -0.297092652 | 0.443651231  |
| H | -0.283675199 | 0.48628111   | 1.02601194   |
| H | -0.856414685 | -0.962278185 | 0.921139918  |

**w8-23\_25**

24

|   |             |              |              |
|---|-------------|--------------|--------------|
| O | 3.3232648   | -1.440686771 | -3.298482569 |
| H | 3.926394097 | -1.838518832 | -3.940582499 |
| H | 3.340777465 | -0.486384731 | -3.489336116 |

|   |              |              |              |
|---|--------------|--------------|--------------|
| O | 2.521242794  | 1.279945862  | -2.809911172 |
| H | 2.736475692  | 1.00381896   | -1.894841653 |
| H | 2.666379403  | 2.234423902  | -2.836775823 |
| O | -2.931917636 | 0.446003355  | 2.108744219  |
| H | -2.237893098 | 1.015245978  | 1.720694689  |
| H | -3.726293904 | 0.658940842  | 1.600808482  |
| O | 0.356205891  | -0.776911341 | -2.965941563 |
| H | 1.091518928  | -1.368633359 | -3.195563855 |
| H | 0.773237636  | 0.097817138  | -3.05100257  |
| O | 3.113226852  | -0.241870375 | -0.519443414 |
| H | 2.232358209  | -0.521608822 | -0.205685697 |
| H | 3.385608265  | -0.964714252 | -1.107847001 |
| O | -1.420427924 | -1.951222779 | 1.725563083  |
| H | -2.075092521 | -1.257352159 | 1.932404424  |
| H | -1.820486728 | -2.782230641 | 2.009082176  |
| O | -0.712011961 | 1.785701414  | 0.890004985  |
| H | -0.276181983 | 1.002559714  | 0.498196077  |
| H | -0.040107941 | 2.172842823  | 1.467424641  |
| O | 0.3138713    | -0.684331222 | -0.116968812 |
| H | -0.250382088 | -1.296382478 | 0.390044538  |
| H | 0.133964453  | -0.852172227 | -1.06199457  |

**w9-66\_25**

27

|   |              |              |              |
|---|--------------|--------------|--------------|
| O | 2.49921747   | 0.234719651  | 2.989872184  |
| H | 3.366201091  | 0.237719702  | 3.416984827  |
| H | 2.544169917  | 0.939533005  | 2.309466384  |
| O | -0.9809234   | -0.290911929 | 1.334345217  |
| H | -1.900165863 | -0.245174087 | 1.009956264  |
| H | -0.939652778 | 0.240286493  | 2.1504203    |
| O | -0.14683138  | 1.160977843  | 3.664223661  |
| H | -0.493536591 | 0.995779298  | 4.551326262  |
| H | 0.766358943  | 0.819418184  | 3.685581577  |
| O | -3.403412694 | -0.028449914 | -0.128400448 |
| H | -3.924443765 | -0.78584558  | -0.426676041 |
| H | -3.001737557 | 0.330433563  | -0.943694293 |
| O | 1.358760861  | -2.056674453 | 1.493077568  |
| H | 0.453337189  | -1.699800189 | 1.474063908  |
| H | 1.829296083  | -1.412170139 | 2.050972968  |
| O | 2.153413147  | 2.277714633  | 1.096301069  |
| H | 1.539916536  | 2.91895186   | 1.482395879  |
| H | 1.647095719  | 1.880253075  | 0.360274631  |
| O | -1.876388092 | 0.999492382  | -2.32938384  |
| H | -1.99154888  | 1.871317838  | -2.729731736 |
| H | -0.977604283 | 1.017062193  | -1.945345801 |

|   |             |              |              |
|---|-------------|--------------|--------------|
| O | 2.317866734 | -1.41215387  | -1.110547204 |
| H | 2.054507492 | -1.801088471 | -0.251919799 |
| H | 2.303634746 | -2.149183696 | -1.73504449  |
| O | 0.538011687 | 0.811286329  | -0.797929087 |
| H | 1.137085544 | 0.092756201  | -1.081652717 |
| H | 0.034652123 | 0.40877008   | -0.060607238 |

**w10-10\_80**

30

|   |              |              |              |
|---|--------------|--------------|--------------|
| O | 2.522998298  | 2.858228189  | 1.064143573  |
| H | 2.421247272  | 2.108675925  | 0.446706542  |
| H | 2.997171907  | 3.531476821  | 0.559329945  |
| O | 0.510196018  | 2.957927459  | 3.098729788  |
| H | 1.191380209  | 3.083325497  | 2.410681942  |
| H | -0.02815007  | 3.759508889  | 3.062495201  |
| O | 2.041055888  | -1.263541413 | 1.71556991   |
| H | 2.390699507  | -0.747748298 | 0.963547961  |
| H | 2.800600678  | -1.4341578   | 2.288305732  |
| O | 2.661130743  | 0.604667414  | -3.315348895 |
| H | 1.70281731   | 0.621295042  | -3.498738824 |
| H | 2.994295278  | -0.130583349 | -3.847454013 |
| O | -1.791854206 | -2.043529079 | 2.885900733  |
| H | -2.737665045 | -1.996268692 | 3.076855894  |
| H | -1.494429018 | -1.115630366 | 2.845842923  |
| O | -0.342092281 | 0.349214419  | 2.266988986  |
| H | -0.147924531 | 1.226725254  | 2.646801932  |
| H | 0.519325523  | -0.107205428 | 2.253291042  |
| O | 2.175895117  | 0.473480777  | -0.489173318 |
| H | 1.225184632  | 0.277464484  | -0.60624924  |
| H | 2.523413968  | 0.463724615  | -1.400977317 |
| O | -0.223668268 | -2.803767502 | 0.524611676  |
| H | 0.630754549  | -2.58608854  | 0.934707279  |
| H | -0.840246159 | -2.771427011 | 1.278930447  |
| O | -0.216060343 | 0.552235772  | -3.317533638 |
| H | -0.970533352 | 0.923328608  | -3.791944091 |
| H | -0.548554725 | 0.3527253    | -2.424126665 |
| O | -0.614616777 | -0.188192984 | -0.569809213 |
| H | -0.583711823 | -1.141209093 | -0.347468489 |
| H | -0.770160299 | 0.220445091  | 0.301042197  |
